# Supplementary material for: Substance use disorders and adherence to antituberculosis medications in Southwest Ethiopia: a prospective cohort study
Source: PubMed Central journal article supplement — BMJ Open. 2021 Jul 5;11(7):e043050. doi: 10.1136/bmjopen-2020-043050 (PMC8258551; doi:10.1136/bmjopen-2020-043050), 2021-07-05
Supplement: bmjopen-2020-043050.draft_revisions.pdf [file bmjopen-2020-043050.draft_revisions.pdf]

# BMJ Open

BMJ Open is committed to open peer review. As part of this commitment we make the peer review history of every article we publish publicly available.

When an article is published we post the peer reviewers' comments and the authors' responses online. We also post the versions of the paper that were used during peer review. These are the versions that the peer review comments apply to.

The versions of the paper that follow are the versions that were submitted during the peer review process. They are not the versions of record or the final published versions. They should not be cited or distributed as the published version of this manuscript.

BMJ Open is an open access journal and the full, final, typeset and author-corrected version of record of the manuscript is available on our site with no access controls, subscription charges or pay-per-view fees (<http://bmjopen.bmj.com>).

If you have any questions on BMJ Open's open peer review process please email [info.bmjopen@bmj.com](mailto:info.bmjopen@bmj.com)

# BMJ Open

## Khat and alcohol use disorders predict poorer adherence to anti-tuberculosis medications in Southwest Ethiopia: A prospective cohort study

|                               |                                                                                                                                                                                                                                                                                                                                                                                                                                                                                                                                                                                                                                                                                                                                                                                                                                                                                                                                                                                                                                                                                                                                                                                                                                                                                                                                                                                     |
|-------------------------------|-------------------------------------------------------------------------------------------------------------------------------------------------------------------------------------------------------------------------------------------------------------------------------------------------------------------------------------------------------------------------------------------------------------------------------------------------------------------------------------------------------------------------------------------------------------------------------------------------------------------------------------------------------------------------------------------------------------------------------------------------------------------------------------------------------------------------------------------------------------------------------------------------------------------------------------------------------------------------------------------------------------------------------------------------------------------------------------------------------------------------------------------------------------------------------------------------------------------------------------------------------------------------------------------------------------------------------------------------------------------------------------|
| Journal:                      | <i>BMJ Open</i>                                                                                                                                                                                                                                                                                                                                                                                                                                                                                                                                                                                                                                                                                                                                                                                                                                                                                                                                                                                                                                                                                                                                                                                                                                                                                                                                                                     |
| Manuscript ID                 | bmjopen-2020-043050                                                                                                                                                                                                                                                                                                                                                                                                                                                                                                                                                                                                                                                                                                                                                                                                                                                                                                                                                                                                                                                                                                                                                                                                                                                                                                                                                                 |
| Article Type:                 | Original research                                                                                                                                                                                                                                                                                                                                                                                                                                                                                                                                                                                                                                                                                                                                                                                                                                                                                                                                                                                                                                                                                                                                                                                                                                                                                                                                                                   |
| Date Submitted by the Author: | 24-Jul-2020                                                                                                                                                                                                                                                                                                                                                                                                                                                                                                                                                                                                                                                                                                                                                                                                                                                                                                                                                                                                                                                                                                                                                                                                                                                                                                                                                                         |
| Complete List of Authors:     | Daba, Matiwas; Jimma University College of Public Health and Medical Sciences, Psychiatry; Center for International Health, Ludwig Maxmillians University, Munich, Germany<br>Tesfaye, Markos ; Department of Psychiatry, St. Paul's Hospital Millennium Medical College, Addis Ababa, Ethiopia, Psychiatry; Center for International Health, Ludwig Maxmillians University, Munich, Germany<br>Adorjan, Kristina; Department of Psychiatry and Psychotherapy, LMU Munich, Germany; Institute of Psychiatric Phenomics and Genomics (IPPG), University Hospital, LMU Munich, Germany<br>Krahl, Wolfgang ; Department of Forensic Psychiatry, Isar Amper Klinikum, Munich, Germany, Forensic Psychiatry; Center for International Health, Ludwig Maxmillians University, Munich, Germany<br>Tesfaye, Elias ; Department of Psychiatry, Medical Faculty, Jimma University, Jimma Ethiopia, Psychiatry<br>Yitayih, Yimenu; Jimma University College of Public Health and Medical Sciences, Psychiatry<br>Strobl, Ralf; Ludwig-Maximilians-Universitat Munchen, Institute for Medical Information Processing, Biometrics and Epidemiology<br>Grill, Eva; Ludwig Maximilians University Munich, Institute for Medical Information Processing, Biometrics and Epidemiology, LMU Munich, Munich, Germany ; Center for International Health, Ludwig Maxmillians University, Munich, Germany |
| Keywords:                     | Substance misuse < PSYCHIATRY, Tuberculosis < INFECTIOUS DISEASES, INFECTIOUS DISEASES, CLINICAL PHARMACOLOGY                                                                                                                                                                                                                                                                                                                                                                                                                                                                                                                                                                                                                                                                                                                                                                                                                                                                                                                                                                                                                                                                                                                                                                                                                                                                       |
|                               |                                                                                                                                                                                                                                                                                                                                                                                                                                                                                                                                                                                                                                                                                                                                                                                                                                                                                                                                                                                                                                                                                                                                                                                                                                                                                                                                                                                     |

SCHOLARONE™  
Manuscripts

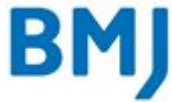

I, the Submitting Author has the right to grant and does grant on behalf of all authors of the Work (as defined in the below author licence), an exclusive licence and/or a non-exclusive licence for contributions from authors who are: i) UK Crown employees; ii) where BMJ has agreed a CC-BY licence shall apply, and/or iii) in accordance with the terms applicable for US Federal Government officers or employees acting as part of their official duties; on a worldwide, perpetual, irrevocable, royalty-free basis to BMJ Publishing Group Ltd ("BMJ") its licensees and where the relevant Journal is co-owned by BMJ to the co-owners of the Journal, to publish the Work in this journal and any other BMJ products and to exploit all rights, as set out in our [licence](#).

The Submitting Author accepts and understands that any supply made under these terms is made by BMJ to the Submitting Author unless you are acting as an employee on behalf of your employer or a postgraduate student of an affiliated institution which is paying any applicable article publishing charge ("APC") for Open Access articles. Where the Submitting Author wishes to make the Work available on an Open Access basis (and intends to pay the relevant APC), the terms of reuse of such Open Access shall be governed by a Creative Commons licence – details of these licences and which [Creative Commons](#) licence will apply to this Work are set out in our licence referred to above.

Other than as permitted in any relevant BMJ Author's Self Archiving Policies, I confirm this Work has not been accepted for publication elsewhere, is not being considered for publication elsewhere and does not duplicate material already published. I confirm all authors consent to publication of this Work and authorise the granting of this licence.

1  
2  
3  
4  
5 **Khat and alcohol use disorders predict poorer adherence to anti-tuberculosis medications**  
6  
7 **in Southwest Ethiopia: A prospective cohort study**  
8

9  
10 Matiws Soboka<sup>1\*,8</sup>, Markos Tesfaye<sup>2,8</sup>, Kristina Adorjan<sup>3,4,8</sup>, Wolfgang Krahl<sup>5,8</sup>, Elias  
11  
12 Tesfaye<sup>1</sup>, Yimenu Yitayih<sup>1</sup>, Ralf Strobl<sup>6</sup>, Eva Grill<sup>6,8</sup>  
13  
14  
15  
16  
17  
18  
19  
20

21 **\* Corresponding author:** Matiws Soboka, Department of Psychiatry, Medical Faculty, Jimma University, Jimma  
22  
23 Ethiopia, Center for International Health, Ludwig Maxmillians University, Munich, Germany  
24

25  
26 **Email:** [matiws2004@yahoo.com](mailto:matiws2004@yahoo.com)  
27

28  
29 **Phone:** +251913792348  
30

31 <sup>1</sup> Department of Psychiatry, Medical Faculty, Jimma University, Jimma Ethiopia.  
32

33  
34 <sup>2</sup> Department of Psychiatry, St. Paul's Hospital Millennium Medical College, Addis Ababa, Ethiopia  
35

36  
37 <sup>3</sup> Department of Psychiatry and Psychotherapy, LMU Munich, Germany  
38

39  
40 <sup>4</sup> Institute of Psychiatric Phenomics and Genomics (IPPG), University Hospital, LMU Munich, Germany  
41

42  
43 <sup>5</sup>Department of Forensic Psychiatry, Isar Amper Klinikum, Munich, Germany  
44

45  
46 <sup>6</sup> Institute for Medical Information Processing, Biometrics and Epidemiology, LMU Munich, Munich, Germany  
47

48  
49 <sup>7</sup> Institute for Medical Information Processing, Biometrics and Epidemiology, LMU Munich, Munich, Germany  
50

51  
52 <sup>8</sup>Center for International Health, Ludwig Maxmillians University, Munich, Germany  
53  
54  
55  
56  
57

## Abstract

**Introduction:** Non-adherence to anti tuberculosis (anti-TB) medication greatly contributes to the rise in multi-drug resistance tuberculosis which is associated with high rates of mortality.

Substance use is frequently seen among patients with poor adherence, however, little is known about the effect of substance use on adherence to anti-TB medications in Ethiopia. The objective of this study was to assess the effect of substance use disorders on adherence to anti-TB medications in Southwest Ethiopia.

**Methods:** A prospective cohort study was conducted among 268 patients with tuberculosis in Southwest Ethiopia between October 2017 and 2018. A structured questionnaire translated to local language was used to assess substance use disorders, adherence and other potential risk factors. Patients were followed for six months and data were collected on three occasions. Generalized linear mixed model was used to identify the effect of substance use disorder on adherence to anti-TB medications. The model fitting was checked using Bayesian Information Criterion (BIC) while the covariate selection was based on a directed acyclic graph (DAG).

**Results:** The overall prevalence of non-adherence among patients with substance use disorders was 16.4% (n=22), 41.7% (n=48), and 45.7% (n=59) at baseline, two month, and six month respectively. The odds of non-adherence to anti-TB medications among patients with khat use disorder was nearly four times that of patients who did not use khat (aOR 3.8, 95%CI=1.8-8.0). Also patients who have alcohol use disorder were 3.2 times likely to have poor adherence compared to their counterparts (aOR=3.2, 95%CI=1.6-6.6). In addition, being educated (aOR =4.4, 95%CI=1.7-11.3), and being merchant (aOR=6.1, 95%CI=1.2-3.0) were associated with non-adherence to anti-TB medications.

1  
2  
3 **Conclusion:** Khat and alcohol use disorders predict greater likelihood of non-adherence to anti-  
4 TB medication. This implies that there is a need to integrate management for substance use  
5 disorders into the existing tuberculosis treatment services.  
6  
7  
8  
9

10  
11 **Keywords:** Substance use disorders, alcohol, khat, anti-TB adherence, non-adherence, food  
12 insecurity, Ethiopia, sub-Saharan Africa  
13  
14  
15

### 16 **Strengths and limitations**

- 17  
18  
19  
20  
21  
22  
23  
24  
25  
26  
27  
28  
29  
30  
31  
32  
33  
34  
35  
36  
37  
38  
39  
40  
41  
42  
43  
44  
45  
46  
47  
48  
49  
50  
51  
52  
53  
54  
55  
56  
57  
58  
59  
60
- The strength of this study are the prospective cohort design, longitudinal data collection, including patients from urban and rural health institutions, intensive training given for data collectors, multi-center data collection, and the use of standardized instruments.
  - Due to social desirability, patients might minimize reporting of the amount and frequency of substance they were using.
  - Measuring adherence based on pills count may not reflect the real adherence situation, because patients might not bring all left over of medications during the follow up.
  - Follow up and data collections have been carried out by health professional working in the respective TB clinic, so their assessment of adherence might be biased.
  - Hospitalized patients, patients on re-treatment and patients with MDR-TB were not included in this study, so that the results cannot be generalized for these patients.

## Introduction

Tuberculosis (TB) is a preventable and treatable disease but it remains one of the major diseases leading to death worldwide (1, 2). According to World Health Organization (WHO) estimates, 1.6 million persons died of TB in 2017 (1), almost 20% of them were HIV positive (1). The number of TB is estimated at about 10 million people with an annual incidence of 6.4%. TB remains the main reason for premature mortality in HIV positive patients (1).

TB is most prevalent in middle and low income countries. This exerts an enormous pressure on societies as TB mainly affects mostly adults in the economically most productive age groups (1, 3, 4). In fact, 87% of cases worldwide from Asia, Africa, and the Russian Federation (1, 5). Tuberculosis related morbidity and mortality also remain high in low and middle income countries due to poor nutrition, unfavorable housing conditions, and unstable health care (1). Notably, in Ethiopia, 117,705 new cases were registered in 2017, corresponding to an annual incidence of 164 per 100,000 habitants (1). Ethiopia remains one of the 22 countries with the highest TB mortality with an estimated mortality rate of 24 per 100, 000 inhabitants in 2017 (1).

Long-term adherence to standardized medication is the key to successful treatment of TB as non-adherence may lead to the emergence of multi drug resistant TB (MDR TB), which is an increasing global health threat (1, 6, 7). Non-adherence to anti TB medication could also lead to a lower treatment success rate (8, 9), default, and death (10, 11). Thus, Ethiopia has developed a national TB treatment guideline to ensure adherence through regular appointments and supervised drug administration, and to reduce poor treatment outcomes (12).

In Ethiopia, the prevalence of non-adherence among TB patients has been estimated to range from 10% in Amhara region to 24% in Southern Nations and Nationalities of Ethiopia (13). To

1  
2  
3 counteract this, the Ethiopian health system has implemented Direct Observed Treatment (DOT)  
4 services in almost all health institutions (12), but its impact on medication adherence is unclear  
5 and the reasons for non-adherence are still poorly understood.  
6  
7  
8

9  
10 Among the reasons for non-adherence, substance use disorders have been found to play a  
11 dominant role (8, 9, 14-16). Use of substances such as alcohol, tobacco, khat, and illicit drugs is  
12 common in persons with TB compared to general population (17-19). Patients with TB are also  
13 at risk to increased morbidity, and premature mortality due to substance use disorders (20).  
14 Alcohol use disorder and tobacco smoking are associated with the risk of MDR-TB (21, 22).  
15  
16  
17  
18  
19

20  
21  
22  
23 Khat is a natural stimulant with over 40 active compounds. Among these, the psychoactive  
24 alkaloids, cathinone, and cathine cause the stimulating effect, craving and dependency (23-26).  
25 There is evidence that khat use increases susceptibility to tuberculosis (27-31), and may be  
26 associated with poor TB treatment outcomes (14, 32), a prolonged duration of treatment (33),  
27 and high load of bacteria in TB patients (34). In Yemen, khat use has been shown to be  
28 associated with non-adherence to anti-tuberculosis medications (35), probably because khat  
29 disrupts patients' sleep patterns and causes them to miss their appointments (35, 36). Ethiopia,  
30 like Yemen, counts among the few countries where khat use is legal. Khat use disorder may be  
31 an important but unrecognized threat to anti-TB medication adherence. Filling the information  
32 gap about the effect of khat and alcohol use disorders will help to improve TB treatment  
33 outcomes and inform decision makers about the need for an integration of substance use disorder  
34 treatment in TB control program in the future.  
35  
36  
37  
38  
39  
40  
41  
42  
43  
44  
45  
46  
47  
48  
49  
50  
51  
52  
53  
54  
55  
56  
57  
58  
59  
60



1  
2  
3 This study aimed to examine the effect of substance use disorders on adherence to anti TB  
4 medications. Specifically, we have examined the association of the most frequently used  
5 substances, namely khat and alcohol, on adherence to guideline compatible TB treatment.  
6  
7  
8  
9

## 10 **Methods**

### 11 **Study area, period and patients**

12  
13  
14  
15 We conducted a prospective cohort study in Jimma zone and Jimma city special zone. Jimma  
16 city special zone is the capital city of Jimma zone and located in the Southwestern part of  
17 Ethiopia, 352 km from Addis Ababa, the capital of the country. The city has a tertiary hospital  
18 and a zonal hospital as well as four functional health centers those currently providing services.  
19  
20 Similarly, Jimma Zone has 18 districts and located in the Southwest of Ethiopia. Overall, the  
21 zone has more than three million inhabitants. During the period of this study, Jimma Zone had  
22 112 health centers and three hospitals. Out of these government's public health facilities, 91  
23 health centers and all hospitals were providing services to TB patients. In this study, data was  
24 collected from a total of 26 health institutions (22 health centers and four hospitals). From Jimma  
25 city we randomly selected 2 health centers and one hospital. We also randomly selected 20  
26 health centers and three hospitals from the Jimma Zone. Patients were included if they had  
27 initiated anti-TB treatment within a month of start of the study at the selected health centers and  
28 hospitals between October 2017 and October 2018.  
29  
30  
31  
32  
33  
34  
35  
36  
37  
38  
39  
40  
41  
42  
43  
44  
45  
46  
47

### 48 **Study design**

49  
50  
51 This study is a multicenter prospective cohort study. Patients recruited to the cohort were  
52 interviewed on three occasions, namely, baseline (starting treatment), first follow up (after 2  
53 months), and second follow up (at the end of six months).  
54  
55  
56  
57

## Sample size assumption and sampling procedure

The prevalence of non-adherence among TB patients who also used khat from previous studies was 62.4% (35). The prevalence of non-adherence among non khat user TB patients was 43.6% (35). We have included 111 exposed (with substance use) and 111 unexposed (without substance use) individuals to detect a difference of non-adherence to anti-TB medication at an alpha level of 0.05 and with a power of 80% using the corrected Fleiss sample size calculation [EPInfo™] (37). The total sample size was calculated considering a 20% of drop out rate and the final sample size was 134 in each group which totals 268 TB patients. New TB patients who were 18 years older were recruited to participate in the study. Patients who had been on treatment for more than one month, patients on re-treatment and MDR-TB were not included in the study.

## Instruments

### Exposure variables

*Substance use disorder:* In this study substance use disorder was defined as the summation of having disorder related to alcohol, and khat. Data on tobacco, shisha, and cannabis use were collected for explorative data analysis.

*Alcohol use disorders (AUDs):*-Alcohol use disorder identification test (AUDIT) was used to collect data on AUDs (38). The AUDIT was evaluated over a period of two decades, and provides an accurate measure of risk of AUDs across gender, age, and cultures. With a cut-off score of eight or more, the sensitivity, and specificity of AUDIT for AUDs was 0.90 and 0.80, respectively (39). AUDIT was used in Ethiopian context and the questions number two and three regarding standard drink were adapted to a more locally appropriate question (40).

1  
2  
3 *Nicotine dependence:* The Fagerstrom test for nicotine dependence (FTND) was used to assess  
4 tobacco dependence. A total score of FTND  $\geq 5$  was considered as tobacco dependence (41). At  
5 a cut-off score  $\geq 5$ , the FTND has good sensitivity (0.75), and specificity (0.80). The FTND has  
6 six items, with a total score ranging from 0-10 to measure nicotine dependence. A total FTND  
7 score of five indicates moderate nicotine dependence, a score of 6-7 indicates high nicotine  
8 dependence, and a score of 8-10 indicates very high nicotine dependence. Patients were also  
9 asked about their reasons for smoking tobacco (41).

10  
11  
12  
13  
14  
15  
16  
17  
18  
19  
20 *Cannabis and shisha use:* Using both substances and their frequency were assessed.

21  
22  
23 *Khat use:* - Khat use was assessed by self-reported questionnaire. Since there is no standardized  
24 questionnaire for khat use, patterns and reasons of khat use were assessed by using a structured  
25 questionnaire which was developed in the context of a literature review. Any consumption of  
26 khat in the last one month was considered as current khat use. Frequent khat use and using more  
27 than one bundle of khat per day was considered as khat use disorder.

### 28 29 30 31 32 33 34 35 **Outcome variable**

36  
37  
38 *Adherence:* Adherence status of tuberculosis patients was assessed by Direct Observed  
39 Treatment (DOT) (based on missing appointments) and pills counts. In this study adherence is  
40 defined as taking medication regularly and attending follow-up according to appointments and  
41 national guideline for tuberculosis in Ethiopia (12). In this study non-adherence is defined as  
42 missing at least one follow-up appointment during DOT. Also, non-adherence during intensive  
43 phase is defined as missing at least one dose of the prescribed anti-TB medication and noted  
44 separately. Adherence was assessed at baseline (beginning of intensive phase), at second month  
45 (end of intensive phase), and at end of 6 month (end of continuation phase).

## Explanatory variables

*Socio-demographic variables:* Age, sex, marital status, level of education, religion, ethnicity, income, household size, occupation, place of residence, and living conditions were assessed using a structured questionnaire. Income was categorized considering that the minimum monthly wage for employees of a governmental organization in Ethiopia of 1,214 Ethiopian birr (36·67 Euros) (42). Then the monthly income of each patient was multiplied by 12 months to obtain the annual income, and we used a cutoff 14,568 Ethiopian birr (439·98 Euros).

*Factors related to health facilities:* Health professionals who were working in TB clinics were asked whether there is addiction counseling services for patients with tuberculosis.

*Disease related factors:* Types of TB diagnosis (smear positive, smear negative, extra pulmonary TB, and MDR-TB) were collected from patients' charts.

*Comorbidities:* All confirmed diagnoses of HIV, previous mental illness, hypertension, and diabetes mellitus were collected from patients' charts.

*Social support:* Oslo Social Support Scale (The Oslo 3-items) was used to collect data on the strength of social support. The Oslo-3 total score 3-8 indicate poor social support, 9-11 indicate moderate social support, and 12-14 indicate strong social support (43). The scale had been validated in Ethiopia among patients with tuberculosis (44). Social support was assessed at baseline, second month (at first follow up), and six month (at the completion of anti-TB treatment or second follow up).

*Food insecurity:* It was assessed by using Household Food Insecurity Access Scale (HFIAS) to determine whether the respondent has experienced any of the indicators of food insecurity in the

1  
2  
3 previous month. Food secure if none of the items were endorsed on HFIAS, mild food insecurity  
4 if the respondent endorsed any of the items 1, 2, 3, and/or 4 but not the items 5 to 9, 'moderate  
5 food insecurity' if the respondent has endorsed items 5, and/or 6 but not the items 7 to 9, and  
6  
7  
8 'severe food insecurity' if the respondent has endorsed items 7, 8, and/or 9 (45). This tool had  
9  
10 been validated in Ethiopia among people living with HIV (46, 47). Food insecurity assessed at  
11  
12 baseline, second month (at first follow up), and six month (at the completion of anti-TB  
13  
14 treatment or second follow up).  
15  
16  
17  
18  
19

### 20 **Data collection procedures**

21  
22  
23 Before starting data collection the questionnaires were pretested on a sample (5% of the total  
24 sample) of patients with TB who were on treatment at Agaro health center. Those patients who  
25 participated in the pretest were not included in the main cohort study. Data was collected by  
26  
27 trained health professionals working in the respective TB clinics. Also, district tuberculosis focal  
28  
29 persons and other health professionals specifically trained for this purpose participated in the  
30  
31 supervision of data collection.  
32  
33  
34  
35  
36  
37

### 38 **Data analysis**

39  
40  
41 Data were entered to Epi Data (version 3.1) and analyzed using R studio (1.2.1335). Missing  
42 values of income were excluded from the analysis. Participants' characteristics and study  
43 variables were presented using descriptive statistics. Generalized linear model was used to  
44  
45 examine the longitudinal effect of substance use disorders on medication adherence (binary  
46  
47 outcome). We used an intercept only model to investigate the trajectory of adherence over time  
48  
49 (model 0). Model 1 investigated the longitudinal effect of presence or absence of khat and  
50  
51 alcohol use disorders on adherence without adjusting for covariates, model 2 investigated the  
52  
53  
54  
55  
56  
57

1  
2  
3 longitudinal effect of khat and alcohol on adherence while adjusting for the full set of covariates.  
4  
5 Model fit was examined with the Bayesian Information Criterion (BIC).  
6  
7

8 The covariate selection was based on a directed acyclic graph (DAG). DAGs are an analytical  
9 method for visualizing hypotheses about causal relationships between exposure (substance use)  
10 and outcome (adherence) (48, 49). This approach has been shown to yield valid adjustment sets  
11 of variables and to avoid bias (50).  
12  
13  
14  
15  
16

### 17 **Ethical considerations**

18  
19 Ethical clearance was obtained from the Ethical Review Board of Jimma University  
20 (IHRPGC1095/2017) and LMU (Nr: 18-017). The study was discussed in detail and written  
21 informed consent was obtained from each participants. The anonymity of the study participants  
22 was kept at all stages of data processing and write-up of the manuscript.  
23  
24  
25  
26  
27  
28  
29  
30

### 31 **Patient and public involvement**

32  
33 Patients were not involved in development of the research questions, study design, interpretation  
34 of results or writing of the manuscript.  
35  
36  
37  
38  
39  
40  
41  
42  
43  
44  
45  
46  
47  
48  
49  
50  
51  
52  
53  
54  
55  
56  
57  
58  
59  
60

## Results

### Socio-demographic characteristic

A total of 268 newly diagnosed patients (50% with substance use disorders, mean age 32·4, SD 14·4, 60·1% male) with tuberculosis were recruited. Of all patients, 10·8% (n=29), and 39·2% (n= 105) had alcohol and khat use disorders, respectively. No participant had tobacco, shisha, or cannabis use disorders. Age range was 18-80 years with 35% under 25 years (Refer to table 1). There were 22 missing data of annual income which we excluded from the analysis.

**Table1: Socio-demographic characteristics and substance use disorder among a cohort of patients on anti-tuberculosis treatment in Southwest Ethiopia, 2017/18 (n=268).**

| Variables  |                     | Total (%) | Substance use disorder |                          |                                    |
|------------|---------------------|-----------|------------------------|--------------------------|------------------------------------|
|            |                     |           | Baseline<br>N (%)      | First follow-up<br>N (%) | 2 <sup>nd</sup> follow up<br>N (%) |
| Gender     | Female              | 39·9      | 40(37·4)               | 35(32·7)                 | 45(42·1)                           |
|            | Male                | 60·1      | 94(58·4)               | 80(49·7)                 | 84(52·2)                           |
| Age        | 18-24               | 34·7      | 42(45·2)               | 31(33·3)                 | 38(40·9)                           |
|            | 25-34               | 32·5      | 35(40·2)               | 34(39·1)                 | 35(40·2)                           |
|            | 35-44               | 13·4      | 23(63·9)               | 20(55·6)                 | 22(61·1)                           |
|            | 45-54               | 10·1      | 17(63·0)               | 16(59·3)                 | 18(66·7)                           |
|            | 55-64               | 9·3       | 17(68·0)               | 14(56·0)                 | 16(64·0)                           |
| Occupation | Merchant            | 10·8      | 23(79·3)               | 19(65·5)                 | 20(69·0)                           |
|            | Farmer              | 34·3      | 57(62·0)               | 51(55·4)                 | 57(62·0)                           |
|            | Government employee | 39·2      | 37(35·2)               | 29(27·6)                 | 33(31·4)                           |
|            | Daily laborer       | 15·7      | 17(40·5)               | 16(38·1)                 | 19(45·2)                           |

|                       |                     |      |           |          |           |
|-----------------------|---------------------|------|-----------|----------|-----------|
| Education             | No formal education | 63·1 | 68(40·2)  | 59(34·9) | 62(36·7)  |
|                       | Literate            | 36·9 | 66(66·7)  | 56(56·6) | 67(67·7)  |
| Annual income in Birr | <14568              | 76·9 | 108(52·4) | 92(44·7) | 104(50·5) |
|                       | ≥14568              | 14·9 | 16(40·0)  | 17(42·5) | 18(45·0)  |
| Marital               | Single              | 36·2 | 85(54·1)  | 76(48·4) | 87(55·4)  |
|                       | Married             | 58·6 | 39(40·2)  | 32(33·0) | 34(35·1)  |
|                       | Divorced/widowed    | 5·2  | 10(71·4)  | 7(50·0)  | 8(57·1)   |
| Religion              | Orthodox            | 30·6 | 43(52·4)  | 27(32·9) | 43(52·4)  |
|                       | Muslim              | 61·6 | 89(53·9)  | 86(52·1) | 82(49·7)  |
|                       | Protestant/others   | 7·8  | 2(9·5)    | 2(9·5)   | 4(19·0)   |
| Ethnicity             | Amhara              | 22·0 | 27(45·8)  | 17(28·8) | 29(49·2)  |
|                       | Oromo               | 61·6 | 83(50·3)  | 82(49·7) | 79(47·9)  |
|                       | Tigre/Gurage        | 16·4 | 24(54·5)  | 16(36·4) | 21(47·7)  |
| Family size           | Less than five      | 67·5 | 89(49·2)  | 76(42·0) | 89(49·2)  |
|                       | Five or greater     | 32·5 | 45(51·7)  | 39(44·8) | 40(46·0)  |
| Residence             | Rural               | 47·4 | 72(56·7)  | 59(46·5) | 68(53·5)  |
|                       | Urban               | 52·6 | 62(44·0)  | 56(39·7) | 61(43·3)  |
| Type of tuberculosis  | Smear positive,     | 40·3 | 54(50·0)  | 43(39·8) | 46(42·6)  |
|                       | Smear negative      | 32·5 | 43(49·4)  | 39(44·8) | 46(52·9)  |
|                       | Extra pulmonary     | 27·2 | 37(50·7)  | 33(45·2) | 37(50·7)  |



### Clinical characteristics and non-adherence

Out of all patients, 40.3 % (n=108), 32.5 % (n=87), and 27.2 % (n=73) were diagnosed with smear positive, smear negative, and extra pulmonary TB respectively. At baseline, 3.7% (n=10) patients were diagnosed with HIV, and 7.1% (n=19) with other comorbidities. At baseline 9.7 % (n=26) were non-adherent to TB medication. This percentage increased to 26.1% (n=70) who were missing at least one dose of their medication at two month assessment and 27.6% (n=74) who were missing at least one dose at the six month assessment.

The prevalence of non-adherence among patients with substance use disorder was 16.4% (n=22), 41.7 % (n=48), and 45.7% (n=59) at baseline, first, and second follow up respectively (See table2).

**Table 2: Various characteristics by adherence to anti-TB medications at the three time point assessments among patients with tuberculosis in Southwest Ethiopia 2017/18 (n=268)**

| Variables              |        | Adherence to anti-TB at baseline |                       | Adherence to anti-TB at first follow-up |                       | Adherence to anti-TB at second follow-up |                       |
|------------------------|--------|----------------------------------|-----------------------|-----------------------------------------|-----------------------|------------------------------------------|-----------------------|
|                        |        | Adherent<br>N (%)                | Non-adherent<br>N (%) | Adherent<br>N (%)                       | Non-adherent<br>N (%) | Adherent<br>N (%)                        | Non-adherent<br>N (%) |
| Substance use disorder | No     | 130(97.0)                        | 4(3.0)                | 131(85.6)                               | 22(14.4)              | 124(89.2)                                | 15(10.8)              |
|                        | Yes    | 112(83.6)                        | 22(16.4)              | 67(58.3)                                | 48(41.7)              | 70(54.3)                                 | 59(45.7)              |
| Gender                 | Male   | 143(88.8)                        | 18(11.2)              | 112(69.6)                               | 49(30.4)              | 83(77.6)                                 | 24(22.4)              |
|                        | Female | 99(92.5)                         | 8(7.5)                | 86(80.4)                                | 21(19.6)              | 111(68.9)                                | 50(31.1)              |
| Age                    | 18-24  | 88(94.6)                         | 5(5.4)                | 72(77.3)                                | 21(22.7)              | 69(74.2)                                 | 24(25.8)              |
|                        | 25-34  | 79(90.8)                         | 8(9.2)                | 64(73.7)                                | 23(26.3)              | 67(77.0)                                 | 20(23.0)              |

|                       |                       |           |          |           |          |           |          |
|-----------------------|-----------------------|-----------|----------|-----------|----------|-----------|----------|
|                       | 35-44                 | 28(77.8)  | 8(22.2)  | 24(66.7)  | 12(33.3) | 23(63.9)  | 13(36.1) |
|                       | 45-54                 | 24(88.9)  | 3(11.1)  | 21(77.8)  | 6(22.2)  | 19(70.4)  | 8(29.6)  |
|                       | 55-64                 | 23(92.0)  | 2(8.0)   | 17(68.0)  | 8(32.0)  | 16(64.0)  | 9(36.0)  |
| Occupation            | Merchant              | 22(75.9)  | 7(24.1)  | 17(58.6)  | 12(41.4) | 14(48.3)  | 15(51.7) |
|                       | Farmer                | 79(85.9)  | 23(14.1) | 66(71.7)  | 26(28.3) | 64(69.6)  | 28(30.4) |
|                       | Government Employee   | 21(95.5)  | 1(4.5)   | 79(75.2)  | 26(24.8) | 82(78.1)  | 23(21.9) |
|                       | Daily laborer         | 41(97.6)  | 1(2.4)   | 36(85.0)  | 6(14.3)  | 34(81.0)  | 8(19.0)  |
| Education             | No formal education   | 165(97.6) | 4(2.4)   | 145(85.8) | 24(14.2) | 139(82.2) | 30(17.8) |
|                       | Literate              | 77(77.8)  | 22(22.2) | 53(53.5)  | 46(46.5) | 55(55.6)  | 44(44.4) |
|                       | Tertiary              | 20(71.4)  | 8(28.6)  | 8(28.6)   | 20(71.4) | 10(35.7)  | 18(64.3) |
| Annual income in Birr | <14568                | 185(89.8) | 21(10.2) | 154(74.8) | 52(25.2) | 149(72.3) | 57(27.7) |
|                       | ≥14568                | 37(92.5)  | 3(7.5)   | 30(75.0)  | 10(25.0) | 31(77.5)  | 9(22.5)  |
| Food insecurity       | No                    | 129(94.9) | 7(5.1)   | 105(72.4) | 40(27.6) | 118(72.8) | 44(27.2) |
|                       | Middle/moderate       | 46(80.7)  | 11(19.3) | 29(70.0)  | 12(29.3) | 26(60.5)  | 17(39.5) |
|                       | Severe                | 67(89.3)  | 8(10.7)  | 64(78.0)  | 18(22.0) | 50(79.4)  | 13(20.6) |
| Marital status        | Single                | 92(94.8)  | 5(5.2)   | 109(69.4) | 48(30.6) | 80(82.5)  | 17(17.5) |
|                       | Married               | 140(89.2) | 17(10.8) | 80(85.8)  | 17(17.2) | 104(66.2) | 53(33.8) |
|                       | Divorced/widowed      | 10(71.4)  | 4(28.6)  | 9(64.6)   | 5(37.4)  | 10(71.4)  | 4(28.6)  |
| Religion              | Orthodox              | 74(90.2)  | 8(9.8)   | 63(76.8)  | 19(23.2) | 61(74.4)  | 21(25.6) |
|                       | Muslim                | 147(89.7) | 18(10.3) | 118(71.5) | 47(28.5) | 114(69.1) | 51(39.9) |
|                       | Protestant and others | 20(95.2)  | 1(4.8)   | 17(81.0)  | 4(19.0)  | 19(90.5)  | 2(9.5)   |

|                |                 |           |          |           |          |           |          |
|----------------|-----------------|-----------|----------|-----------|----------|-----------|----------|
| Ethnicity      | Amhara          | 53(89·8)  | 6(10·2)  | 49(83·1)  | 10(16·9) | 48(81·4)  | 11(18·6) |
|                | Oromo           | 160(90·9) | 16(9·1)  | 119(72·1) | 46(27·9) | 119(72·1) | 46(27·9) |
|                | Tigre/Gurage    | 29(87·9)  | 4(12·1)  | 30(68·2)  | 14(31·8) | 27(61·4)  | 17(38·6) |
| Family size    | Less than five  | 165(91·2) | 16(8·8)  | 132(72·9) | 49(27·1) | 137(75·7) | 44(24·3) |
|                | Five or greater | 77(88·5)  | 10(11·5) | 66(75·9)  | 21(24·1) | 57(64·5)  | 30(34·5) |
| Residence      | Rural           | 113(89·0) | 14(11·0) | 94(74·0)  | 33(26·0) | 93(73·2)  | 34(26·8) |
|                | Urban           | 129(91·5) | 12(8·5)  | 104(73·0) | 37(26·2) | 101(71·6) | 40(28·4) |
| Type of TB     | Smear positive  | 95(91·9)  | 13(8·1)  | 80(74·1)  | 28(25·9) | 78(72·2)  | 30(27·8) |
|                | Smear negative  | 81(9·1)   | 6(6·9)   | 66(75·9)  | 21(24·1) | 64(73·6)  | 23(26·4) |
|                | Extra pulmonary | 66(90·4)  | 7(9·6)   | 52(71·2)  | 21(28·8) | 52(71·2)  | 21(28·8) |
| HIV            | Seronegative    | 233(90·3) | 25(9·7)  | 190(74·2) | 66(25·8) | 183(73·5) | 66(26·5) |
|                | Seropositive    | 9(90·0)   | 1(10·0)  | 8(66·7)   | 4(33·3)  | 11(57·9)  | 8(42·1)  |
| Social support | Poor            | 83(89·2)  | 10(10·8) | 83(74·8)  | 28(25·2) | 96(68·6)  | 44(34·1) |
|                | Moderate        | 101(89·4) | 12(10·6) | 68(80·0)  | 17(20·0) | 58(78·4)  | 16(21·6) |
|                | Good            | 58(93·5)  | 4(6·5)   | 47(65·3)  | 25(34·7) | 40(74·1)  | 14(25·9) |

### Effect of substance use disorder on the adherence to anti medications

The intercept only model (model 0) showed a significant decrease in the percentage of adherence over time (BIC= 642.5). Adding alcohol and khat use disorders (model 1) improved model fit (BIC=627·6): Patients with khat use disorder had a significantly higher probability of non-adherence over time (OR= 4·2, 95%CI=2·1-8·6). The odds of non-adherence among patients with alcohol use disorder (AUDs) was 3·3 times that of patients free of AUDs (OR=3·3, 95%CI=1·6-6·6). Adding covariates did not substantially change this association (OR= 2·8,

95%CI=2.0-3.8) and further improved model fit (BIC= 642.2). In the final model khat use disorder (aOR= 3.8, 95%CI=1.8-8.0), or alcohol use disorder (aOR= 3.2, 95%CI=1.6-6.6), being educated (aOR=4.4, 95%CI=1.7-11.3), and being merchant (aOR=6.1, 95%CI= 1.2-30.8) were associated with decreasing adherence (See table 3). Patients with khat use disorder were 3.8 times more likely to be non-adherent to anti-TB medications than patients without khat use disorder. Also, participants whose occupation was merchant were 6.1 times more likely to be non-adherent to anti-TB medications compared to daily laborers.

**Table 3: Predictors of non-adherence to anti TB medications among patients with tuberculosis in Southwest Ethiopia 2017/2018 (n=268).**

| Variables      |                         | Model 0(Intercept only) |       | Model 1(khat and alcohol including age and gender) |         | Full model |          |
|----------------|-------------------------|-------------------------|-------|----------------------------------------------------|---------|------------|----------|
|                |                         | OR                      | 95%CI | OR                                                 | 95%CI   | aOR        | 95%CI    |
| Khat UD        | No                      | Reference               |       |                                                    |         |            |          |
|                | Yes                     | -                       | -     | 4.2                                                | 2.1-8.6 | 3.8        | 1.8-8.0  |
| AUDs           | No                      | Reference               |       |                                                    |         |            |          |
|                | Yes                     | -                       | -     | 3.3                                                | 1.6-6.6 | 3.2        | 1.6-6.6  |
| Age            | 18-24                   | Reference               |       |                                                    |         |            |          |
|                | 25-34                   | -                       | -     | 1.2                                                | 0.4-3.2 | -          | -        |
|                | 35-44                   | -                       | -     | 1.8                                                | 0.5-6.4 | -          | -        |
|                | 45-54                   | -                       | -     | 0.9                                                | 0.2-4.0 | -          | -        |
|                | ≥55                     | -                       | -     | 1.2                                                | 0.3-5.1 | -          | -        |
| Gender         | Female                  | Reference               |       |                                                    |         |            |          |
|                | Male                    | -                       | -     | 1.6                                                | 0.7-3.6 | -          | -        |
| Education      | No formal education     | Reference               |       |                                                    |         |            |          |
|                | Read and write/literate | -                       | -     | -                                                  | -       | 4.4        | 1.7-11.3 |
| Social support | Good                    | Reference               |       |                                                    |         |            |          |

|            |                     |           |         |       |         |       |          |
|------------|---------------------|-----------|---------|-------|---------|-------|----------|
|            | moderate            | -         | -       | -     | -       | 0·5   | 0·2-1·2  |
|            | Poor                | -         | -       | -     | -       | 0·8   | 0·3-1·9  |
| Occupation | Daily laborer       | Reference |         |       |         |       |          |
|            | Farmer              | -         | -       | -     | -       | 2·1   | 0·5-8·0  |
|            | Government employee | -         | -       | -     | -       | 2·1   | 0·6-8·0  |
|            | Merchant            | -         | -       | -     | -       | 6·1   | 1·2-30·8 |
| Time T2    |                     | 2·7       | 2·0-3·6 | 2·7   | 2·0-3·6 | 2·8   | 2·0-3·8  |
| BIC        |                     | 642·5     |         | 672·6 |         | 642·2 |          |

For peer review only

## Discussion

This study conducted in patients undergoing standardized treatment for tuberculosis in Southwest Ethiopia revealed three important findings: 1) adherence to medication decreased over the course of treatment; 2) substance use disorders, particularly khat and alcohol contributed to this non-adherence, and 3) this association was independent of other factors such as education, social support and occupation.

It is alarming that adherence to TB medication decreased over the course of treatment, as already shown by studies done in South (51), Northwest (52), and Addis Ababa (53) Ethiopia. Possible reasons for non-compliance included distance from the health institution that dispenses medications (13, 51), lack of knowledge about tuberculosis (51, 52), psychological distress (53), being busy with work (52), and alcohol intake (52). To solve the problem related to adherence, Ethiopian health authorities have reinforced their efforts to implement DOT programs throughout the whole treatment and all over the country starting from initiation to completion of treatment (12).

In this study the prevalence of non-adherence to anti-TB medication in the first month of treatment was 9.7 % which is in line with a systematic review that found 10.0% of non-adherence in the Amhara region (13, 54). The proportion of non-adherence to anti-TB medications during the first (26.1%) and second (27.6%) follow up was slightly higher than findings from South (24.5%) (51), Northwest (21.2%) (52), and Addis Ababa (19.5%) (53) Ethiopia. This might be explained by the high proportion of persons with a substance use disorder in our study, in which we deliberately oversampled persons with SUD to maximize

1  
2  
3 power. The discrepancy may be due to patients in our study were using substance whereas in the  
4  
5 systematic review there was no data regarding substance use.  
6  
7

8  
9 In this study the prevalence of non-adherence among patients with substance use disorder at  
10  
11 baseline, first, and second follow up was 16·4%, 41·7%, and 45·7% respectively. This is in line  
12  
13 with a study from the US (39%) (52, 55, 56).  
14  
15

16  
17 Moreover, this study provides the evidence that substance use disorders have significant negative  
18  
19 effect on adherence to anti-TB medications among patients with tuberculosis, which supports  
20  
21 earlier findings from previous studies that found alcohol use disorder, tobacco dependence, and  
22  
23 illicit drug use have negative impact on adherence in Uzbekistan, Spain, and Morocco (57-59).  
24  
25 This is also, in line with retrospective studies conducted in Russia and New York which found  
26  
27 that alcohol use disorder and drug addiction were significantly associated with non-adherence to  
28  
29 anti-TB medications (8, 9). Likewise, the finding of this study is in line with studies conducted in  
30  
31 different parts of Ethiopia which found khat, alcohol, and tobacco are the main factors for non-  
32  
33 adherence to anti-TB medications (52, 56, 60). In our study patients with substance use disorder  
34  
35 were more than two times more likely not to follow their medication plan than patients without  
36  
37 substance use disorders. This finding is in line with finding of a study from US that found the  
38  
39 risk of missing a DOT appointment was 2.6 times higher among patients with substance use  
40  
41 disorder than in patients without drug consumption (55).  
42  
43  
44  
45  
46

47  
48 In our study, khat use disorder turned out to be the most stringent factor that decreased  
49  
50 adherence. This confirms earlier findings from Yemen (61) and Ethiopia (14, 60). A plausible  
51  
52 explanation is that khat chewing disrupts night sleep (62) causing patients to oversleep which  
53  
54 may lead to missing the DOT appointments at the health facility. Another reason may be that  
55  
56  
57  
58  
59  
60

1  
2  
3 khat is omnipresent in Ethiopia, and therefore less attention is paid to the use of khat. Since little  
4  
5 is known about the effect of khat on patients with tuberculosis (14), khat may be considered as  
6  
7 part of a normal social interaction (61).  
8  
9

10  
11 A higher level of education was associated with non-adherence to anti-TB medications in our  
12  
13 study. This result confirms the findings from Yemen that found more educated patients were  
14  
15 19% times less likely to be adherent to their medication (61). Also, a study from Ethiopia  
16  
17 showed that attending primary education was associated with non-adherence to anti-TB  
18  
19 medications (60). Our findings are contrary to previous studies which have suggested that lower  
20  
21 or no formal education decreases adherence to TB medication (13, 63). Our finding seems  
22  
23 counterintuitive. However, our results are likely to be related to findings from a study indicating  
24  
25 that persons with higher educational attainment might be reluctant to accept DOTS regimes (64).  
26  
27 Daily visits to the health facility have been reported as too time consuming and probably  
28  
29 stigmatizing for patients with a job (65). In this study, being merchant was associated with poor  
30  
31 adherence to anti-TB medications. This might be due to patients miss their medications because  
32  
33 of busy working time, but it needs further investigation.  
34  
35  
36  
37  
38

### 39 **Limitations**

40  
41  
42 This study has some limitations. Due to social desirability, patients might minimize reporting of  
43  
44 the amount and frequency of substance they were using. Also, measuring adherence based on  
45  
46 pills count may not reflect the real adherence situation for the same reason as some patients  
47  
48 might not bring all left over of medications during the follow up. Likewise, follow up and data  
49  
50 collections have been carried out by health professional working in the respective TB clinic, so  
51  
52 their assessment of adherence might be biased. However, overestimating adherence may have  
53  
54  
55  
56  
57



1  
2  
3 biased our results towards a null effect and led to underestimating the effect of substance use  
4 disorders, so we are confident that our estimates are conservative. The participation of district  
5 tuberculosis focal persons and other health professionals in the supervision of data collection  
6 might also introduce bias.  
7  
8  
9  
10  
11

12  
13 Also, hospitalized patients, patients on re-treatment and patients with MDR-TB were not  
14 included in this study, so that the results cannot be generalized for these patients. However,  
15 MDR-TB patients are under special treatment and surveillance so that including this group of  
16 patients might have biased the results. Finally, we did not assess the reasons for non-adherence.  
17 This should be part of a separate study going more into the details of the situation of persons  
18 with khat and alcohol problems.  
19  
20  
21  
22  
23  
24  
25  
26

### 27 28 **Strengths**

29  
30  
31 The specific strength of this study are the prospective cohort design, longitudinal data collection,  
32 including patients from urban and rural health institutions, intensive training given for data  
33 collectors, multi-center data collection, and the use of standardized instruments to assess  
34 exposure, outcomes and explanatory variables.  
35  
36  
37  
38  
39  
40

### 41 **Conclusions**

42  
43  
44 Substance use disorders predict greater likelihood of anti-TB medication non-adherence among  
45 TB patients. Also in our study, khat and alcohol use disorders were the main risk factors for anti-  
46 TB medications adherence. This finding implies the importance integrating of substance use  
47 disorder screening and treatment in to the existing tuberculosis services to reduce the effect of  
48 substance on treatment outcomes including adherence.  
49  
50  
51  
52  
53  
54  
55  
56  
57

### **Ethics approval and consent to participate**

Ethical clearance was obtained from the ethical review committee of Jimma University, Institute of Health. Written informed consent was obtained from each participant before participation. Information obtained in due course was kept confidentially

### **Consent for publication**

Not applicable.

### **Competing of interest**

All authors declare that they have no conflict of interests.

### **Funding**

The study was funded by Jimma University Institute of Health with the grant number of IHRPGC 1095/2017, Institute of Psychiatric Phenomics and Genomics (IPPG) with the grant number of 15106202/2018, and individual throughout data collection. The funders had no role in this study including interpretation and preparation of the manuscript.

### **Authors' contribution**

MS contributed to the conceptualization, design, statistical analysis and manuscript preparation. MT, KA, WK, ET, YY, RS and EG contributed to the design, analysis and the review of the manuscript.

## Author affiliations

<sup>1</sup> Department of Psychiatry, Medical Faculty, Jimma University, Jimma Ethiopia.

<sup>2</sup> Department of Psychiatry, St. Paul's Hospital Millennium Medical College, Addis Ababa, Ethiopia

<sup>3</sup> Department of Psychiatry and Psychotherapy, LMU Munich, Germany

<sup>4</sup> Institute of Psychiatric Phenomics and Genomics (IPPG), University Hospital, LMU Munich, Germany

<sup>5</sup> Department of Forensic Psychiatry, Isar Amper Klinikum, Munich, Germany

<sup>6</sup> Institute for Medical Information Processing, Biometrics and Epidemiology, LMU Munich, Munich, Germany

<sup>7</sup> Institute for Medical Information Processing, Biometrics and Epidemiology, LMU Munich, Munich, Germany

<sup>8</sup> Center for International Health, Ludwig Maxmillians University, Munich, Germany

## Acknowledgement

We are grateful to the study participants for compromising their time to participate in the study. Our gratitude is extended for Jimma University for funding the project. We are also grateful to IPPG for funding part of the project. Our gratitude extended to Dr. Michael Odenwald, who contributed money from his pocket to support the project.

## Availability of data

It will be available up on official request from the interested individuals or organization.

## References

1. Global tuberculosis report 2018. Geneva: World Health Organization; 2018. Licence: CC BY-NC-SA 3.0 IGO. [https://www.who.int/tb/publications/global\\_report/en/](https://www.who.int/tb/publications/global_report/en/) accessed on 24/07/2019
2. Grobusch MP, Kapata N. Global burden of tuberculosis: where we are and what to do. *Lancet Infect Dis.* 2018; 18(12):1291-3.
3. Patel V, Chisholm D, Dua T, Laxminarayan R, Medina-Mora ME. Mental, Neurological, and Substance Use Disorders: Disease Control Priorities, Third Edition (Volume 4). Washington (DC): The International Bank for Reconstruction and Development / The World Bank, 2016.
4. Floyd K, Glaziou P, Zumla A, Raviglione M. The global tuberculosis epidemic and progress in care, prevention, and research: an overview in year 3 of the end TB era. *Lancet Respir Med.* 2018; 6(4):299-314.
5. Global tuberculosis report 2016, Geneva, World Health Organization; 2016. <https://apps.who.int/medicinedocs/en/d/Js23098en/> accessed on 24/07/2019.
6. Dodor EA. Tuberculosis treatment default at the communicable diseases unit of Effia-Nkwanta Regional Hospital: a 2-year experience. *Int J Tuberc Lung Dis.* 2004; 8(11):1337-41.
7. Global tuberculosis report 2013. Geneva, World Health Organization; 2013. <http://apps.who.int/medicinedocs/en/m/abstract/Js21534en/> accessed on 25/07/2019
8. Gelmanova IY, Keshavjee S, Golubchikova VT, Berezina VI, Strelis AK, Yanova GV, et al. Barriers to successful tuberculosis treatment in Tomsk, Russian Federation: non-adherence,

1  
2  
3 default and the acquisition of multidrug resistance. Bulletin of the World Health Organization.  
4  
5 2007; 85(9):703-11.  
6

7  
8  
9 9. Pablos-Mendez A, Knirsch CA, Barr RG, Lerner BH, Frieden TR. Non-adherence in  
10  
11 tuberculosis treatment: predictors and consequences in New York City. The American journal of  
12  
13 medicine, 1997; 102(2):164-70.  
14

15  
16 10. Mohd Shariff N, Shah SA, Kamaludin F. Predictors of death among drug-resistant  
17  
18 tuberculosis patients in Kuala Lumpur, Malaysia: A retrospective cohort study from 2009 to  
19  
20 2013. J Glob Antimicrob Resist. 2016; 6:102-7.  
21  
22

23  
24 11. Waitt CJ, Squire SB. A systematic review of risk factors for death in adults during and  
25  
26 after tuberculosis treatment. Int J Tuberc Lung Dis. 2011; 15(7):871-85.  
27  
28

29  
30 12. Federal Democratic Republic of Ethiopia MoH. Guidelines for clinical and programmatic  
31  
32 management of Tb, leprosy and Tb/HIV in Ethiopia fifth edition: MoH; 2012.  
33

34  
35 13. Zegeye A, Dessie G, Wagnew F, Gebrie A, Islam SMS, Tesfaye B, et al. Prevalence and  
36  
37 determinants of anti-tuberculosis treatment non-adherence in Ethiopia: A systematic review and  
38  
39 meta-analysis. PLoS One. 2019; 14(1):e0210422.  
40  
41

42  
43 14. Ambaw F, Mayston R, Hanlon C, Medhin G, Alem A. Untreated depression and  
44  
45 tuberculosis treatment outcomes, quality of life and disability, Ethiopia. Bulletin of the World  
46  
47 Health Organization. 2018; 96(4):243-55.  
48  
49

50  
51 15. Pelissari DM, Diaz-Quijano FA. Impact of alcohol disorder and the use of illicit drugs on  
52  
53 tuberculosis treatment outcomes: a retrospective cohort study. Arch Public Health. 2018; 76:45.  
54  
55  
56  
57

- 1  
2  
3 16. Silva MR, Pereira JC, Costa RR, Dias JA, Guimaraes MDC, Leite ICG. Drug addiction  
4 and alcoholism as predictors for tuberculosis treatment default in Brazil: a prospective cohort  
5 study. *Epidemiol Infect.* 2017; 145(16):3516-24.  
6  
7  
8  
9  
10  
11 17. Lienhardt C, Fielding K, Sillah JS, Bah B, Gustafson P, Warndorff D, et al. Investigation  
12 of the risk factors for tuberculosis: a case-control study in three countries in West Africa.  
13 *International journal of epidemiology.* 2005; 34(4):914-23.  
14  
15  
16  
17  
18 18. Lynch JB. Multidrug-resistant Tuberculosis. *The Medical clinics of North America.*  
19 2013; 97(4):553-79, ix-x.  
20  
21  
22  
23  
24 19. O'Connell R, Chishinga N, Kinyanda E, Patel V, Ayles H, Weiss HA, et al. Prevalence  
25 and correlates of alcohol dependence disorder among TB and HIV infected patients in Zambia.  
26 *PloS one.* 2013; 8(9):e74406.  
27  
28  
29  
30  
31  
32 20. Christensen AS, Roed C, Andersen PH, Andersen AB, Obel N. Long-term mortality in  
33 patients with pulmonary and extrapulmonary tuberculosis: a Danish nationwide cohort study.  
34 *Clinical epidemiology.* 2014; 6:405-21.  
35  
36  
37  
38  
39  
40 21. Fleming MF, Krupitsky E, Tsoy M, Zvartau E, Brazhenko N, Jakubowiak W, et al.  
41 Alcohol and drug use disorders, HIV status and drug resistance in a sample of Russian TB  
42 patients. *The international journal of tuberculosis and lung disease: the official journal of the*  
43 *International Union against Tuberculosis and Lung Disease.* 2006; 10(5):565-70.  
44  
45  
46  
47  
48  
49  
50 22. Skrahina A, Hurevich H, Zalutskaya A, Sahalchyk E, Astrauko A, Hoffner S, et al.  
51 Multidrug-resistant tuberculosis in Belarus: the size of the problem and associated risk factors.  
52 *Bulletin of the World Health Organization.* 2013; 91(1):36-45.  
53  
54  
55  
56  
57  
58  
59  
60

- 1  
2  
3 23. Luqman W, Danowski TS. The use of khat (*Catha edulis*) in Yemen. Social and medical  
4 observations. *Ann Intern Med.* 1976;85(2):246-9.  
5  
6  
7  
8 24. Gebissa E. Khat in the Horn of Africa: historical perspectives and current trends. *J*  
9 *Ethnopharmacol.* 2010; 132(3):607-14.  
10  
11  
12  
13 25. Dhaifalah I, Santavy J. Khat habit and its health effect. A natural amphetamine. *Biomed*  
14 *Pap Med Fac Univ Palacky Olomouc Czech Repub.* 2004; 148(1):11-5.  
15  
16  
17 26. Alfaifi H, Abdelwahab SI, Mohan S, Elhassan Taha MM, Syame SM, Shaala LA, et al.  
18 *Catha edulis* Forsk. (Khat): Evaluation of its Antidepressant-like Activity. *Pharmacognosy*  
19 *magazine.* 2017; 13(Suppl 2):S354-s8.  
20  
21  
22  
23 27. Wolde D, Tadesse M, Abdella K, Abebe G, Ali S. Tuberculosis among Jimma University  
24 Undergraduate Students: First Insight about the Burden of Tuberculosis in Ethiopia Universities-  
25 Cross-Sectional Study. *Int J Bacteriol.* 2017;9840670.  
26  
27  
28 28. Alemu YM, Awoke W, Wilder-Smith A. Determinants for tuberculosis in HIV-infected  
29 adults in Northwest Ethiopia: a multicentre case-control study. *BMJ Open.* 2016; 6(4):e009058.  
30  
31  
32 29. Jaber AA, Khan AH, Sulaiman SA, Ahmad N. Role of socio-demographical factors on  
33 tuberculosis outcome in Yemen. *International journal of mycobacteriology.* 2016; 5(1):S20.  
34  
35  
36 30. Legesse M, Ameni G, Mamo G, Medhin G, Shawel D, Bjune G, et al. Knowledge and  
37 perception of pulmonary tuberculosis in pastoral communities in the middle and Lower Awash  
38 Valley of Afar region, Ethiopia. *BMC Public Health.* 2010; 10:187.  
39  
40  
41  
42  
43  
44  
45  
46  
47  
48  
49  
50  
51  
52  
53  
54  
55  
56  
57  
58  
59  
60

- 1  
2  
3 31. Alvi A, Rizwan M, Sunosi RA, Bin Ali Jerah A. Does khat chewing increases the risk of  
4 Mycobacterium tuberculosis infection by macrophage immune modulation? Med Hypotheses.  
5 2014; 82(6):667-9.  
6  
7  
8  
9  
10  
11 32. Jaber AA, Khan AH, Syed Sulaiman SA, Ahmad N, Anaam MS. Evaluation of Health-  
12 Related Quality of Life among Tuberculosis Patients in Two Cities in Yemen. PLoS One. 2016;  
13 11(6):e0156258.  
14  
15  
16  
17  
18 33. Jaber AAS, Khan AH, Sulaiman SAS. Evaluating treatment outcomes and durations  
19 among cases of smear-positive pulmonary tuberculosis in Yemen: a prospective follow-up study.  
20 J Pharm Policy Pract. 2017; 10:36.  
21  
22  
23  
24  
25  
26 34. Alvi A, Fatima N, Jerah AA, Rizwan M, Hobani YH, Sunosi RA, et al. Correlation  
27 between Resistin, Tuberculosis and Khat Addiction: A Study from South Western Province of  
28 Saudi Arabia. PLoS One. 2015; 10(10):e0140245.  
29  
30  
31  
32  
33  
34 35. Anaam MS I, Al Serouri AW, Aldobhani A. Factors affecting patients' compliance to  
35 anti-tuberculosis treatment in Yemen: JPHSR; 2013.  
36  
37  
38  
39 36. Cox G, Rampes H. Adverse effects of khat: a review. Advances in Psychiatric Treatment.  
40 2018; 9(6):456-63.  
41  
42  
43  
44  
45 37. EPIInfoTM. <http://apps.who.int/medicinedocs/en/m/abstract/Js21534en/> accessed on  
46 19/08/2019  
47  
48  
49  
50 38. Babor TF, Higgins-Biddle JC, Saunders JB, Monteiro MG. The Alcohol Use Disorders  
51 Identification Test Guidelines for Use in Primary Care. World Health Organization. 2001.  
52  
53  
54  
55  
56  
57  
58  
59  
60



1  
2  
3 [https://apps.who.int/iris/bitstream/handle/10665/67205/WHO\\_MS\\_D\\_MSB\\_01.6a.pdf;jsessionid=](https://apps.who.int/iris/bitstream/handle/10665/67205/WHO_MS_D_MSB_01.6a.pdf;jsessionid=B5D5F8F1F1B82FE622D04E8F02635F05?sequence=1)  
4  
5 [B5D5F8F1F1B82FE622D04E8F02635F05?sequence=1](https://apps.who.int/iris/bitstream/handle/10665/67205/WHO_MS_D_MSB_01.6a.pdf;jsessionid=B5D5F8F1F1B82FE622D04E8F02635F05?sequence=1) accessed on 20/07/2019.  
6  
7

8  
9 39. Babor TF, Higgins-Biddle JC, Saunders JB, Monteiro MG. The Alcohol Use Disorders  
10 Identification Test Guidelines for Use in Primary Care. World Health Organization. 2001.  
11  
12

13  
14 40. Soboka M, Tesfaye M, Feyissa GT, Hanlon C. Alcohol use disorders and associated  
15 factors among people living with HIV who are attending services in south west Ethiopia. BMC  
16 research notes. 2014; 7:828.  
17  
18

19  
20  
21 41. Mikami I, Akechi T, Kugaya A, Okuyama T, Nakano T, Okamura H, et al. Screening for  
22 nicotine dependence among smoking-related cancer patients. Japanese journal of cancer research  
23 : Gann. 1999; 90(10):1071-5.  
24  
25  
26

27  
28  
29 42. Average Salary in Ethiopia. [http://www.salaryexplorer.com/salary-](http://www.salaryexplorer.com/salary-survey.php?loc=69&loctype=1)  
30 [survey.php?loc=69&loctype=1](http://www.salaryexplorer.com/salary-survey.php?loc=69&loctype=1) accessed on 09/07/2019.  
31  
32

33  
34  
35 43. Instrument Manual: Oslo-3 Social Support Scale (OSS-3)2006.  
36 [https://circabc.europa.eu/webdav/CircaBC/ESTAT/healthtf/Library/ehis\\_wave\\_2/methodology\\_e](https://circabc.europa.eu/webdav/CircaBC/ESTAT/healthtf/Library/ehis_wave_2/methodology_ehis/development/instruments/Manual_OSS_3.pdf)  
37 [his/development/instruments/Manual\\_OSS\\_3.pdf](https://circabc.europa.eu/webdav/CircaBC/ESTAT/healthtf/Library/ehis_wave_2/methodology_ehis/development/instruments/Manual_OSS_3.pdf) , Accessed on 08/06/2019  
38  
39

40  
41  
42 44. Duko B, Gebeyehu A, Ayano G. Prevalence and correlates of depression and anxiety  
43 among patients with tuberculosis at Wolaita Sodo University Hospital and Sodo Health Center,  
44 Wolaita Sodo, South Ethiopia, Cross sectional study. BMC psychiatry. 2015; 15:214.  
45  
46  
47

48  
49  
50 45. Coates J SA, Bilinsky P. Household Food Insecurity Access Scale (HFIAS) for  
51 measurement of food access: Indicator guide (V.3): Washington, D.C.: FHI 360/FANTA; 2007.  
52  
53  
54

1  
2  
3 [http://www.fao.org/fileadmin/user\\_upload/eufao-fsi4dm/doc-training/hfias.pdf](http://www.fao.org/fileadmin/user_upload/eufao-fsi4dm/doc-training/hfias.pdf) accessed on  
4  
5 10/01/2017  
6

7  
8 46. Tesfaye M, Kaestel P, Olsen MF, Girma T, Yilma D, Abdissa A, et al. Food insecurity,  
9 mental health and quality of life among people living with HIV commencing antiretroviral  
10 treatment in Ethiopia: a cross-sectional study. *Health and quality of life outcomes*. 2016; 14:37.  
11  
12

13  
14  
15 47. Maes KC, Hadley C, Tesfaye F, Shifferaw S, Tesfaye YA. Food insecurity among  
16 volunteer AIDS caregivers in Addis Ababa, Ethiopia was highly prevalent but buffered from the  
17 2008 food crisis. *The Journal of nutrition*. 2009; 139(9):1758-64.  
18  
19  
20  
21

22  
23 48. Greenland S, Pearl J, Robins JM. Causal diagrams for epidemiologic research.  
24 *Epidemiology*. 1999; 10(1):37-48.  
25  
26

27  
28 49. Textor J, Hardt J, Knuppel S. DAGitty: a graphical tool for analyzing causal diagrams.  
29 *Epidemiology*. 2011; 22(5):745.  
30  
31  
32

33  
34 50. Shrier I, Platt RW. Reducing bias through directed acyclic graphs. *BMC Med Res*  
35 *Methodol*. 2008; 8:70.  
36  
37

38  
39 51. Woimo TT, Yimer WK, Bati T, Gesesew HA. The prevalence and factors associated for  
40 anti-tuberculosis treatment non-adherence among pulmonary tuberculosis patients in public  
41 health care facilities in South Ethiopia: a cross-sectional study. *BMC Public Health*. 2017;  
42 17(1):269.  
43  
44  
45  
46  
47

48  
49 52. Mekonnen HS, Azagew AW. Non-adherence to anti-tuberculosis treatment, reasons and  
50 associated factors among TB patients attending at Gondar town health centers, Northwest  
51 Ethiopia. *BMC research notes*. 2018; 11(1):691.  
52  
53  
54  
55

- 1  
2  
3 53. Tola HH, Garmaroudi G, Shojaeizadeh D, Tol A, Yekaninejad MS, Ejeta LT, et al. The  
4 Effect of Psychosocial Factors and Patients' Perception of Tuberculosis Treatment Non-  
5 Adherence in Addis Ababa, Ethiopia. *Ethiopian journal of health sciences*. 2017; 27(5):447-58.  
6  
7  
8  
9  
10  
11 54. Adane AA, Alene KA, Koye DN, Zeleke BM. Non-adherence to anti-tuberculosis  
12 treatment and determinant factors among patients with tuberculosis in northwest Ethiopia. *PLoS*  
13 *One*. 2013; 8(11):e78791.  
14  
15  
16  
17  
18 55. Ricks PM, Hershov RC, Rahimian A, Huo D, Johnson W, Prachand N, et al. A  
19 randomized trial comparing standard outcomes in two treatment models for substance users with  
20 tuberculosis. *Int J Tuberc Lung Dis*. 2015; 19(3):326-32.  
21  
22  
23  
24  
25  
26 56. Sahile Z, Yared A, Kaba M. Patients' experiences and perceptions on associates of TB  
27 treatment adherence: a qualitative study on DOTS service in public health centers in Addis  
28 Ababa, Ethiopia. *BMC Public Health*. 2018; 18(1):462.  
29  
30  
31  
32  
33  
34 57. Hasker E, Khodjikhhanov M, Usarova S, Asamidinov U, Yuldashova U, van der Werf MJ,  
35 et al. Default from tuberculosis treatment in Tashkent, Uzbekistan; who are these defaulters and  
36 why do they default? *BMC Infect Dis*. 2008; 8:97.  
37  
38  
39  
40  
41  
42 58. Cayla JA, Caminero JA, Rey R, Lara N, Valles X, Galdos-Tanguis H. Current status of  
43 treatment completion and fatality among tuberculosis patients in Spain. *Int J Tuberc Lung Dis*.  
44 2004; 8(4):458-64.  
45  
46  
47  
48  
49 59. Dooley KE, Lahlou O, Ghali I, Knudsen J, Elmessaoudi MD, Cherkaoui I, et al. Risk  
50 factors for tuberculosis treatment failure, default, or relapse and outcomes of retreatment in  
51 Morocco. *BMC Public Health*. 2011; 11:140.  
52  
53  
54  
55  
56  
57  
58  
59  
60

- 1  
2  
3 60. Tesfahuneygn G, Medhin G, Legesse M. Adherence to Anti-tuberculosis treatment and  
4 treatment outcomes among tuberculosis patients in Alamata District, northeast Ethiopia. BMC  
5 research notes. 2015; 8:503.  
6  
7  
8  
9  
10  
11 61. Anaam MS, Mohamed Ibrahim MI, Al Serouri AW, Aldobhani A. Factors affecting  
12 patients' compliance to anti-tuberculosis treatment in Yemen. Journal of Pharmaceutical Health  
13 Services Research. 2013; 4(2):115-22.  
14  
15  
16  
17  
18 62. Adane K, Spigt M, Ferede S, Asmelash T, Abebe M, Dinant GJ. Half of Pulmonary  
19 Tuberculosis Cases Were Left Undiagnosed in Prisons of the Tigray Region of Ethiopia:  
20 Implications for Tuberculosis Control. PLoS One. 2016; 11(2):e0149453.  
21  
22  
23  
24  
25  
26 63. Fang XH, Dan YL, Liu J, Jun L, Zhang ZP, Kan XH, et al. Factors influencing  
27 completion of treatment among pulmonary tuberculosis patients. Patient Prefer Adherence. 2019;  
28 13:491-6.  
29  
30  
31  
32  
33  
34 64. Kawatsu L, Uchimura K, Ohkado A, Kato S. A combination of quantitative and  
35 qualitative methods in investigating risk factors for lost to follow-up for tuberculosis treatment in  
36 Japan - Are physicians and nurses at a particular risk? PLoS One. 2018; 13(6):e0198075.  
37  
38  
39  
40  
41  
42 65. Gebreweld FH, Kifle MM, Gebremicheal FE, Simel LL, Gezae MM, Ghebreyesus SS, et  
43 al. Factors influencing adherence to tuberculosis treatment in Asmara, Eritrea: a qualitative  
44 study. J Health Popul Nutr. 2018; 37(1):1.  
45  
46  
47  
48  
49  
50  
51  
52  
53  
54  
55  
56  
57  
58  
59  
60

# Reporting checklist for cohort study.

Based on the STROBE cohort guidelines.

## Instructions to authors

Complete this checklist by entering the page numbers from your manuscript where readers will find each of the items listed below.

Your article may not currently address all the items on the checklist. Please modify your text to include the missing information. If you are certain that an item does not apply, please write "n/a" and provide a short explanation.

Upload your completed checklist as an extra file when you submit to a journal.

In your methods section, say that you used the STROBE cohort reporting guidelines, and cite them as:

von Elm E, Altman DG, Egger M, Pocock SJ, Gøtzsche PC, Vandenbroucke JP. The Strengthening the Reporting of Observational Studies in Epidemiology (STROBE) Statement: guidelines for reporting observational studies.

|                           |                     |                                                                                    | Page   |
|---------------------------|---------------------|------------------------------------------------------------------------------------|--------|
|                           |                     | Reporting Item                                                                     | Number |
| <b>Title and abstract</b> |                     |                                                                                    |        |
| Title                     | <a href="#">#1a</a> | Indicate the study's design with a commonly used term in the title or the abstract | 1      |
| Abstract                  | <a href="#">#1b</a> | Provide in the abstract an informative and balanced summary                        | 2,3    |

of what was done and what was found

## Introduction

Background / [#2](#) Explain the scientific background and rationale for the 4-6  
rationale investigation being reported

Objectives [#3](#) State specific objectives, including any prespecified 6  
hypotheses

## Methods

Study design [#4](#) Present key elements of study design early in the paper 6

Setting [#5](#) Describe the setting, locations, and relevant dates, including 6  
periods of recruitment, exposure, follow-up, and data collection

Eligibility criteria [#6a](#) Give the eligibility criteria, and the sources and methods of 6  
selection of participants. Describe methods of follow-up.

Eligibility criteria [#6b](#) For matched studies, give matching criteria and number of  
exposed and unexposed

Variables [#7](#) Clearly define all outcomes, exposures, predictors, potential 7-10  
confounders, and effect modifiers. Give diagnostic criteria, if  
applicable

Data sources / [#8](#) For each variable of interest give sources of data and details of 7-10  
measurement methods of assessment (measurement). Describe  
comparability of assessment methods if there is more than one  
group. Give information separately for for exposed and  
unexposed groups if applicable.

|    |                |                      |                                                                   |        |
|----|----------------|----------------------|-------------------------------------------------------------------|--------|
| 1  | Bias           | <a href="#">#9</a>   | Describe any efforts to address potential sources of bias         | 10,11  |
| 2  |                |                      |                                                                   |        |
| 3  |                |                      |                                                                   |        |
| 4  | Study size     | <a href="#">#10</a>  | Explain how the study size was arrived at                         | 7      |
| 5  |                |                      |                                                                   |        |
| 6  |                |                      |                                                                   |        |
| 7  | Quantitative   | <a href="#">#11</a>  | Explain how quantitative variables were handled in the            | 10, 11 |
| 8  | variables      |                      | analyses. If applicable, describe which groupings were chosen,    |        |
| 9  |                |                      | and why                                                           |        |
| 10 |                |                      |                                                                   |        |
| 11 |                |                      |                                                                   |        |
| 12 |                |                      |                                                                   |        |
| 13 |                |                      |                                                                   |        |
| 14 |                |                      |                                                                   |        |
| 15 | Statistical    | <a href="#">#12a</a> | Describe all statistical methods, including those used to control | 10,11  |
| 16 | methods        |                      | for confounding                                                   |        |
| 17 |                |                      |                                                                   |        |
| 18 |                |                      |                                                                   |        |
| 19 |                |                      |                                                                   |        |
| 20 | Statistical    | <a href="#">#12b</a> | Describe any methods used to examine subgroups and                |        |
| 21 | methods        |                      | interactions                                                      |        |
| 22 |                |                      |                                                                   |        |
| 23 |                |                      |                                                                   |        |
| 24 |                |                      |                                                                   |        |
| 25 |                |                      |                                                                   |        |
| 26 | Statistical    | <a href="#">#12c</a> | Explain how missing data were addressed                           | 10     |
| 27 | methods        |                      |                                                                   |        |
| 28 |                |                      |                                                                   |        |
| 29 |                |                      |                                                                   |        |
| 30 |                |                      |                                                                   |        |
| 31 | Statistical    | <a href="#">#12d</a> | If applicable, explain how loss to follow-up was addressed        |        |
| 32 | methods        |                      |                                                                   |        |
| 33 |                |                      |                                                                   |        |
| 34 |                |                      |                                                                   |        |
| 35 |                |                      |                                                                   |        |
| 36 | Statistical    | <a href="#">#12e</a> | Describe any sensitivity analyses                                 |        |
| 37 | methods        |                      |                                                                   |        |
| 38 |                |                      |                                                                   |        |
| 39 |                |                      |                                                                   |        |
| 40 |                |                      |                                                                   |        |
| 41 |                |                      |                                                                   |        |
| 42 | <b>Results</b> |                      |                                                                   |        |
| 43 |                |                      |                                                                   |        |
| 44 |                |                      |                                                                   |        |
| 45 | Participants   | <a href="#">#13a</a> | Report numbers of individuals at each stage of study—eg           | 12     |
| 46 |                |                      | numbers potentially eligible, examined for eligibility, confirmed |        |
| 47 |                |                      | eligible, included in the study, completing follow-up, and        |        |
| 48 |                |                      | analysed. Give information separately for for exposed and         |        |
| 49 |                |                      | unexposed groups if applicable.                                   |        |
| 50 |                |                      |                                                                   |        |
| 51 |                |                      |                                                                   |        |
| 52 |                |                      |                                                                   |        |
| 53 |                |                      |                                                                   |        |
| 54 |                |                      |                                                                   |        |
| 55 |                |                      |                                                                   |        |
| 56 |                |                      |                                                                   |        |
| 57 | Participants   | <a href="#">#13b</a> | Give reasons for non-participation at each stage                  |        |
| 58 |                |                      |                                                                   |        |
| 59 |                |                      |                                                                   |        |
| 60 |                |                      |                                                                   |        |

|    |                   |                      |                                                                   |        |
|----|-------------------|----------------------|-------------------------------------------------------------------|--------|
| 1  | Participants      | <a href="#">#13c</a> | Consider use of a flow diagram                                    |        |
| 2  |                   |                      |                                                                   |        |
| 3  |                   |                      |                                                                   |        |
| 4  | Descriptive data  | <a href="#">#14a</a> | Give characteristics of study participants (eg demographic,       | 12, 13 |
| 5  |                   |                      | clinical, social) and information on exposures and potential      |        |
| 6  |                   |                      | confounders. Give information separately for exposed and          |        |
| 7  |                   |                      | unexposed groups if applicable.                                   |        |
| 8  |                   |                      |                                                                   |        |
| 9  |                   |                      |                                                                   |        |
| 10 |                   |                      |                                                                   |        |
| 11 |                   |                      |                                                                   |        |
| 12 |                   |                      |                                                                   |        |
| 13 |                   |                      |                                                                   |        |
| 14 | Descriptive data  | <a href="#">#14b</a> | Indicate number of participants with missing data for each        | 12     |
| 15 |                   |                      | variable of interest                                              |        |
| 16 |                   |                      |                                                                   |        |
| 17 |                   |                      |                                                                   |        |
| 18 |                   |                      |                                                                   |        |
| 19 | Descriptive data  | <a href="#">#14c</a> | Summarise follow-up time (eg, average and total amount)           |        |
| 20 |                   |                      |                                                                   |        |
| 21 |                   |                      |                                                                   |        |
| 22 |                   |                      |                                                                   |        |
| 23 | Outcome data      | <a href="#">#15</a>  | Report numbers of outcome events or summary measures              | 14, 15 |
| 24 |                   |                      | over time. Give information separately for exposed and            |        |
| 25 |                   |                      | unexposed groups if applicable.                                   |        |
| 26 |                   |                      |                                                                   |        |
| 27 |                   |                      |                                                                   |        |
| 28 |                   |                      |                                                                   |        |
| 29 |                   |                      |                                                                   |        |
| 30 | Main results      | <a href="#">#16a</a> | Give unadjusted estimates and, if applicable, confounder-         | 14-18  |
| 31 |                   |                      | adjusted estimates and their precision (eg, 95% confidence        |        |
| 32 |                   |                      | interval). Make clear which confounders were adjusted for and     |        |
| 33 |                   |                      | why they were included                                            |        |
| 34 |                   |                      |                                                                   |        |
| 35 |                   |                      |                                                                   |        |
| 36 |                   |                      |                                                                   |        |
| 37 |                   |                      |                                                                   |        |
| 38 |                   |                      |                                                                   |        |
| 39 |                   |                      |                                                                   |        |
| 40 | Main results      | <a href="#">#16b</a> | Report category boundaries when continuous variables were         |        |
| 41 |                   |                      | categorized                                                       |        |
| 42 |                   |                      |                                                                   |        |
| 43 |                   |                      |                                                                   |        |
| 44 |                   |                      |                                                                   |        |
| 45 | Main results      | <a href="#">#16c</a> | If relevant, consider translating estimates of relative risk into |        |
| 46 |                   |                      | absolute risk for a meaningful time period                        |        |
| 47 |                   |                      |                                                                   |        |
| 48 |                   |                      |                                                                   |        |
| 49 |                   |                      |                                                                   |        |
| 50 |                   |                      |                                                                   |        |
| 51 | Other analyses    | <a href="#">#17</a>  | Report other analyses done—e.g., analyses of subgroups and        |        |
| 52 |                   |                      | interactions, and sensitivity analyses                            |        |
| 53 |                   |                      |                                                                   |        |
| 54 |                   |                      |                                                                   |        |
| 55 |                   |                      |                                                                   |        |
| 56 | <b>Discussion</b> |                      |                                                                   |        |
| 57 |                   |                      |                                                                   |        |
| 58 |                   |                      |                                                                   |        |
| 59 |                   |                      |                                                                   |        |
| 60 |                   |                      |                                                                   |        |



|    |                          |                     |                                                                      |       |
|----|--------------------------|---------------------|----------------------------------------------------------------------|-------|
| 1  | Key results              | <a href="#">#18</a> | Summarise key results with reference to study objectives             | 19-21 |
| 2  |                          |                     |                                                                      |       |
| 3  |                          |                     |                                                                      |       |
| 4  | Limitations              | <a href="#">#19</a> | Discuss limitations of the study, taking into account sources of     | 21    |
| 5  |                          |                     | potential bias or imprecision. Discuss both direction and            |       |
| 6  |                          |                     | magnitude of any potential bias.                                     |       |
| 7  |                          |                     |                                                                      |       |
| 8  |                          |                     |                                                                      |       |
| 9  |                          |                     |                                                                      |       |
| 10 |                          |                     |                                                                      |       |
| 11 |                          |                     |                                                                      |       |
| 12 | Interpretation           | <a href="#">#20</a> | Give a cautious overall interpretation considering objectives,       | 19-21 |
| 13 |                          |                     | limitations, multiplicity of analyses, results from similar studies, |       |
| 14 |                          |                     | and other relevant evidence.                                         |       |
| 15 |                          |                     |                                                                      |       |
| 16 |                          |                     |                                                                      |       |
| 17 |                          |                     |                                                                      |       |
| 18 |                          |                     |                                                                      |       |
| 19 | Generalisability         | <a href="#">#21</a> | Discuss the generalisability (external validity) of the study        |       |
| 20 |                          |                     | results                                                              |       |
| 21 |                          |                     |                                                                      |       |
| 22 |                          |                     |                                                                      |       |
| 23 |                          |                     |                                                                      |       |
| 24 |                          |                     |                                                                      |       |
| 25 | <b>Other Information</b> |                     |                                                                      |       |
| 26 |                          |                     |                                                                      |       |
| 27 |                          |                     |                                                                      |       |
| 28 | Funding                  | <a href="#">#22</a> | Give the source of funding and the role of the funders for the       | 23    |
| 29 |                          |                     | present study and, if applicable, for the original study on which    |       |
| 30 |                          |                     | the present article is based                                         |       |
| 31 |                          |                     |                                                                      |       |
| 32 |                          |                     |                                                                      |       |
| 33 |                          |                     |                                                                      |       |
| 34 |                          |                     |                                                                      |       |
| 35 |                          |                     |                                                                      |       |

36 None The STROBE checklist is distributed under the terms of the Creative Commons Attribution  
37 License CC-BY. This checklist can be completed online using <https://www.goodreports.org/>, a tool  
38 made by the [EQUATOR Network](#) in collaboration with [Penelope.ai](#)  
39  
40  
41  
42  
43  
44  
45  
46  
47  
48  
49  
50  
51  
52  
53  
54  
55  
56  
57  
58  
59  
60

# BMJ Open

## Substance use disorders and adherence to anti-tuberculosis medications in Southwest Ethiopia: A prospective cohort study

|                                 |                                                                                                                                                                                                                                                                                                                                                                                                                                                                                                                                                                                                                                                                                                                                                                                                                                                                                                                                                                                                                                                                                                                                                                                                                                                                                                                                                                                     |
|---------------------------------|-------------------------------------------------------------------------------------------------------------------------------------------------------------------------------------------------------------------------------------------------------------------------------------------------------------------------------------------------------------------------------------------------------------------------------------------------------------------------------------------------------------------------------------------------------------------------------------------------------------------------------------------------------------------------------------------------------------------------------------------------------------------------------------------------------------------------------------------------------------------------------------------------------------------------------------------------------------------------------------------------------------------------------------------------------------------------------------------------------------------------------------------------------------------------------------------------------------------------------------------------------------------------------------------------------------------------------------------------------------------------------------|
| Journal:                        | <i>BMJ Open</i>                                                                                                                                                                                                                                                                                                                                                                                                                                                                                                                                                                                                                                                                                                                                                                                                                                                                                                                                                                                                                                                                                                                                                                                                                                                                                                                                                                     |
| Manuscript ID                   | bmjopen-2020-043050.R1                                                                                                                                                                                                                                                                                                                                                                                                                                                                                                                                                                                                                                                                                                                                                                                                                                                                                                                                                                                                                                                                                                                                                                                                                                                                                                                                                              |
| Article Type:                   | Original research                                                                                                                                                                                                                                                                                                                                                                                                                                                                                                                                                                                                                                                                                                                                                                                                                                                                                                                                                                                                                                                                                                                                                                                                                                                                                                                                                                   |
| Date Submitted by the Author:   | 03-Feb-2021                                                                                                                                                                                                                                                                                                                                                                                                                                                                                                                                                                                                                                                                                                                                                                                                                                                                                                                                                                                                                                                                                                                                                                                                                                                                                                                                                                         |
| Complete List of Authors:       | Daba, Matiwos; Jimma University College of Public Health and Medical Sciences, Psychiatry; Center for International Health, Ludwig Maxmillians University, Munich, Germany<br>Tesfaye, Markos ; Department of Psychiatry, St. Paul's Hospital Millennium Medical College, Addis Ababa, Ethiopia, Psychiatry; Center for International Health, Ludwig Maxmillians University, Munich, Germany<br>Adorjan, Kristina; Department of Psychiatry and Psychotherapy, LMU Munich, Germany; Institute of Psychiatric Phenomics and Genomics (IPPG), University Hospital, LMU Munich, Germany<br>Krahl, Wolfgang ; Department of Forensic Psychiatry, Isar Amper Klinikum, Munich, Germany, Forensic Psychiatry; Center for International Health, Ludwig Maxmillians University, Munich, Germany<br>Tesfaye, Elias ; Department of Psychiatry, Medical Faculty, Jimma University, Jimma Ethiopia, Psychiatry<br>Yitayih, Yimenu; Jimma University College of Public Health and Medical Sciences, Psychiatry<br>Strobl, Ralf; Ludwig-Maximilians-Universitat Munchen, Institute for Medical Information Processing, Biometrics and Epidemiology<br>Grill, Eva; Ludwig Maximilians University Munich, Institute for Medical Information Processing, Biometrics and Epidemiology, LMU Munich, Munich, Germany ; Center for International Health, Ludwig Maxmillians University, Munich, Germany |
| <b>Primary Subject Heading</b>: | Addiction                                                                                                                                                                                                                                                                                                                                                                                                                                                                                                                                                                                                                                                                                                                                                                                                                                                                                                                                                                                                                                                                                                                                                                                                                                                                                                                                                                           |
| Secondary Subject Heading:      | Addiction, Infectious diseases, Mental health                                                                                                                                                                                                                                                                                                                                                                                                                                                                                                                                                                                                                                                                                                                                                                                                                                                                                                                                                                                                                                                                                                                                                                                                                                                                                                                                       |
| Keywords:                       | Substance misuse < PSYCHIATRY, Tuberculosis < INFECTIOUS DISEASES, INFECTIOUS DISEASES, CLINICAL PHARMACOLOGY                                                                                                                                                                                                                                                                                                                                                                                                                                                                                                                                                                                                                                                                                                                                                                                                                                                                                                                                                                                                                                                                                                                                                                                                                                                                       |
|                                 |                                                                                                                                                                                                                                                                                                                                                                                                                                                                                                                                                                                                                                                                                                                                                                                                                                                                                                                                                                                                                                                                                                                                                                                                                                                                                                                                                                                     |

SCHOLARONE™  
Manuscripts



I, the Submitting Author has the right to grant and does grant on behalf of all authors of the Work (as defined in the below author licence), an exclusive licence and/or a non-exclusive licence for contributions from authors who are: i) UK Crown employees; ii) where BMJ has agreed a CC-BY licence shall apply, and/or iii) in accordance with the terms applicable for US Federal Government officers or employees acting as part of their official duties; on a worldwide, perpetual, irrevocable, royalty-free basis to BMJ Publishing Group Ltd ("BMJ") its licensees and where the relevant Journal is co-owned by BMJ to the co-owners of the Journal, to publish the Work in this journal and any other BMJ products and to exploit all rights, as set out in our [licence](#).

The Submitting Author accepts and understands that any supply made under these terms is made by BMJ to the Submitting Author unless you are acting as an employee on behalf of your employer or a postgraduate student of an affiliated institution which is paying any applicable article publishing charge ("APC") for Open Access articles. Where the Submitting Author wishes to make the Work available on an Open Access basis (and intends to pay the relevant APC), the terms of reuse of such Open Access shall be governed by a Creative Commons licence – details of these licences and which [Creative Commons](#) licence will apply to this Work are set out in our licence referred to above.

Other than as permitted in any relevant BMJ Author's Self Archiving Policies, I confirm this Work has not been accepted for publication elsewhere, is not being considered for publication elsewhere and does not duplicate material already published. I confirm all authors consent to publication of this Work and authorise the granting of this licence.

1  
2  
3  
4  
5 **Substance use disorders and adherence to anti-tuberculosis medications in Southwest**  
6  
7 **Ethiopia: A prospective cohort study**  
8

9  
10 Matiws Soboka<sup>1\*,8</sup>, Markos Tesfaye<sup>2,8</sup>, Kristina Adorjan<sup>3,4,8</sup>, Wolfgang Krahl<sup>5,8</sup>, Elias  
11  
12 Tesfaye<sup>1</sup>, Yimenu Yitayih<sup>1</sup>, Ralf Strobl<sup>6</sup>, Eva Grill<sup>6,8</sup>  
13  
14  
15  
16  
17  
18  
19  
20

21 **\* Corresponding author:** Matiws Soboka, Department of Psychiatry, Medical Faculty, Jimma University, Jimma  
22  
23 Ethiopia, Center for International Health, Ludwig Maxmillians University, Munich, Germany  
24

25  
26 **Email:** [matiws2004@yahoo.com](mailto:matiws2004@yahoo.com)  
27

28  
29 **Phone:** +251913792348  
30

31 <sup>1</sup> Department of Psychiatry, Medical Faculty, Jimma University, Jimma Ethiopia.  
32

33  
34 <sup>2</sup> Department of Psychiatry, St. Paul's Hospital Millennium Medical College, Addis Ababa, Ethiopia  
35

36  
37 <sup>3</sup> Department of Psychiatry and Psychotherapy, LMU Munich, Germany  
38

39  
40 <sup>4</sup> Institute of Psychiatric Phenomics and Genomics (IPPG), University Hospital, LMU Munich, Germany  
41

42  
43 <sup>5</sup>Department of Forensic Psychiatry, Isar Amper Klinikum, Munich, Germany  
44

45  
46 <sup>6</sup> Institute for Medical Information Processing, Biometrics and Epidemiology, LMU Munich, Munich, Germany  
47

48  
49 <sup>7</sup> Institute for Medical Information Processing, Biometrics and Epidemiology, LMU Munich, Munich, Germany  
50

51  
52 <sup>8</sup>Center for International Health, Ludwig Maxmillians University, Munich, Germany  
53  
54  
55  
56  
57  
58  
59  
60

## Abstract

**Objectives:** In Ethiopia, little is known about the association between substance use disorders and adherence to anti-TB medications. Therefore, the objective of this study was to assess the effect of substance use disorders on adherence to anti-TB medications in Southwest Ethiopia.

**Design:** Prospective cohort study.

**Settings:** Patients were recruited from 22 health centers and four hospitals in Southwest Ethiopia.

**Participants:** This study was conducted among 268 patients with tuberculosis, aged 18-80 in Southwest Ethiopia between October 2017 and October 2018. At baseline, patients who were exposed substance use disorders (134 patients) and unexposed to substance use disorders (134 patients) were recruited. Patients were followed for six months, and data were collected on three occasions.

**Main outcome measure:** Adherence to anti-TB medications.

**Results:** Patients with substance use disorders had consistently higher prevalence of non-adherence than those without, 16.4% vs. 3.0% at baseline, 41.7% vs 14.4% at two month follow up, and 45.7% vs 10.8% at six month follow up assessments. The odds of non-adherence to anti-TB medications among patients with khat use disorder was nearly four times that of patients who did not use khat (aOR 3.8, 95%CI=1.8-8.0). Patients who had alcohol use disorder were also 3.2 times likely to have poor adherence compared to their counterparts (aOR=3.2, 95%CI=1.6-6.6). In addition, being educated (aOR =4.4, 95%CI=1.7-11.3), and being merchant (aOR=6.1, 95%CI=1.2-3.0) were associated with non-adherence to anti-TB medications.

1  
2  
3 **Conclusion:** Khat and alcohol use disorders predict greater likelihood of non-adherence to anti-  
4 TB medication. This implies the need to integrate the management for substance use disorders  
5 into the existing tuberculosis treatment services.  
6  
7  
8  
9

10  
11 **Keywords:** Substance use disorders, alcohol, khat, anti-TB adherence, non-adherence, Ethiopia.  
12  
13

### 14 **Strengths and limitations**

- 15  
16  
17 ➤ The strengths of this study are the prospective cohort design, longitudinal data collection,  
18 including patients from urban and rural health institutions, intensive training for data  
19 collectors, multi-center data collection, and use of standardized instruments.  
20  
21  
22  
23  
24  
25 ➤ Due to social desirability, patients might minimize reporting of the amount and frequency  
26 of the substances they were using.  
27  
28  
29  
30  
31 ➤ Measuring adherence based on pills count may not reflect the real adherence situation,  
32 since patients may not bring all leftover medications during the follow up.  
33  
34  
35  
36 ➤ Follow up and data collections have been carried out by health professionals working in  
37 the respective TB clinic. As a result, their assessment of adherence might be biased.  
38  
39  
40  
41 ➤ Hospitalized patients, patients on re-treatment, and patients with MDR-TB were not  
42 included in this study, and this may limit the generalizability of the result for these  
43 patients.  
44  
45  
46  
47  
48  
49  
50  
51  
52  
53  
54  
55  
56  
57  
58  
59  
60

## Introduction

Tuberculosis (TB) is a preventable and treatable disease but it remains one of the major diseases leading to death worldwide (1, 2). World Health Organization (WHO) estimates that 1.6 million persons died of TB in 2017 (1); almost 20% of them were HIV positive (1). The number of TB patients is estimated at about 10 million with an annual incidence of 6.4%. TB remains the main reason for premature mortality among HIV positive patients (1).

TB is most prevalent in middle and low-income countries. This exerts enormous pressure on societies as TB mainly affects mostly adults in the economically productive age groups (1, 3, 4).

In fact, 87% of cases worldwide are from Asia, Africa, and the Russian Federation (1, 5).

Tuberculosis related morbidity and mortality also remain high in low and middle-income countries. Because these countries have poor nutrition, unfavorable housing conditions, and unstable health care (1). Notably, 117,705 new cases were registered in 2017 in Ethiopia, corresponding to an annual incidence of 164 per 100,000 inhabitants (1). Ethiopia remains one of the top 22 countries having the highest TB mortality with an estimated mortality rate of 24 per 100,000 inhabitants in 2017 (1).

Long-term adherence to standardized medication is the key to successful treatment of TB as non-adherence may lead to the emergence of multidrug-resistant TB (MDR-TB), an increasing global health threat (1, 6, 7). Non-adherence to anti-TB medication could also lead to a lower treatment success rate (8, 9), default, and death (10, 11). Thus, Ethiopia has developed a national TB treatment guideline to ensure adherence through regular appointments and supervised drug administration, and to reduce poor treatment outcomes (12).

1  
2  
3 In Ethiopia, the prevalence of non-adherence among TB patients has been estimated to range  
4 from 10% in Amhara region to 24% in Southern Nations and Nationalities of Ethiopia (13). To  
5  
6 counteract this, the Ethiopian has implemented Direct Observed Treatment (DOT) services in  
7  
8 almost all health institutions (12), but its impact on medication adherence is unclear and the  
9  
10 reasons for non-adherence are still poorly understood.  
11  
12  
13

14  
15 Among the reasons for non-adherence, substance use disorders have been found to play a  
16  
17 dominant role (8, 14-16). Substances such as alcohol, tobacco, khat, and illicit drugs are  
18  
19 commonly used among patients with TB (17-19). Patients with TB are also at risk of increased  
20  
21 morbidity, and premature mortality due to substance use disorders (20). Because, substance use  
22  
23 disorders such as alcohol and tobacco are associated with MDR-TB (21, 22).  
24  
25  
26

27  
28 Khat is a natural stimulant with over 40 active compounds. Among these, psychoactive alkaloids,  
29  
30 cathinone, and cathine cause the stimulating effect, and lead to craving and dependency (23-26).  
31  
32 There is evidence that khat use increases susceptibility to tuberculosis (27-31), and maybe  
33  
34 associated with poor TB treatment outcomes (14, 32), prolonged duration of treatment (33), and  
35  
36 high load of bacteria in TB patients (34). In Yemen, khat use has been shown to be associated  
37  
38 with non-adherence to anti-tuberculosis medications (35), probably because khat disrupts  
39  
40 patients' sleep patterns and causes them to miss their appointments (35, 36). Ethiopia, like  
41  
42 Yemen, counts among the few countries where khat use is legal. Khat use disorder may be an  
43  
44 important but unrecognized threat to anti-TB medication adherence. Filling the information gaps  
45  
46 about the effect of substance use disorders will help to improve TB treatment outcomes and  
47  
48 inform decision makers about the need for an integration of substance use disorder treatment in  
49  
50 TB control programs in the future.  
51  
52  
53  
54  
55  
56  
57  
58  
59  
60



1  
2  
3 This study aimed to examine the effect of substance use disorders on adherence to anti TB  
4 medications. Specifically, we examined the association of the most frequently used substances,  
5  
6 namely khat and alcohol, on adherence to guideline compatible TB treatment.  
7  
8  
9

## 10 **Methods**

### 11 **Study area, period, and patients**

12  
13  
14  
15 We conducted a prospective cohort study in Jimma zone and Jimma city special zone. Jimma  
16 city special zone is the capital city of Jimma zone and located in the Southwestern part of  
17 Ethiopia, 352 km from Addis Ababa, the capital of the country. The city has a tertiary hospital  
18 and a zonal hospital, as well as four functional health centers those currently providing services.  
19  
20 Similarly, Jimma Zone has 18 districts and located in the Southwest of Ethiopia. Overall, the  
21 zone has more than three million inhabitants. During the period of this study, Jimma Zone had  
22 112 health centers and three hospitals. Out of these government's public health facilities, 91  
23 health centers and all hospitals were providing services to TB patients. In this study, data was  
24 collected from a total of 26 health institutions (22 health centers and four hospitals). From Jimma  
25 city, we randomly selected 2 health centers and one hospital. We also randomly selected 20  
26 health centers and three hospitals from the Jimma Zone. Patients were included if they had  
27 initiated anti-TB treatment within a month of start of the study at the selected health centers and  
28 hospitals between October 2017 and October 2018.  
29  
30  
31  
32  
33  
34  
35  
36  
37  
38  
39  
40  
41  
42  
43  
44  
45  
46  
47

### 48 **Study design**

49  
50  
51 This study is a multicenter prospective cohort study. Patients recruited to the cohort were  
52 interviewed on three occasions, namely, baseline (starting treatment), first follow up (after 2  
53 months), and second follow up (at the end of six months).  
54  
55  
56  
57

### Sample size assumption and sampling procedure

The prevalence of non-adherence among TB patients who also used khat from previous studies was 62.4% (35). The prevalence of non-adherence among non khat user TB patients was 43.6% (35). We have included 111 exposed (with substance use) and 111 unexposed (without substance use) individuals to detect a difference of non-adherence to anti-TB medication at an alpha level of 0.05 and with a power of 80% using the corrected Fleiss sample size calculation [EPInfo™] (37). The total sample size was calculated considering a 20% of drop out rate and the final sample size was 134 in each group which totals 268 TB patients. New TB patients who were 18 years or older were recruited to participate in the study. Patients who had been on treatment for more than one month, patients on re-treatment, and MDR-TB cases were not included in the study.

### Instruments

#### Exposure variables

*Substance use disorder:* In this study substance use disorder was defined as the summation of having disorder related to alcohol and khat. Data on tobacco, shisha, and cannabis use were collected for explorative data analysis.

*Alcohol use disorders (AUDs):*-Alcohol use disorder identification test (AUDIT) was used to collect data on AUDs (38). The AUDIT was evaluated over a period of two decades, and provides an accurate measure of risk of AUDs across gender, age, and cultures. With a cut-off score of eight or more, the sensitivity, and specificity of AUDIT for AUDs was 0.90 and 0.80, respectively (39). AUDIT was used in Ethiopian context and questions number two and three regarding standard drinks were adapted to a more locally appropriate question (40).

1  
2  
3 *Nicotine dependence:* The Fagerstrom test for nicotine dependence (FTND) was used to assess  
4 tobacco dependence. A total score of FTND  $\geq 5$  was considered as tobacco dependence (41). At  
5  
6 a cut-off score  $\geq 5$ , the FTND has good sensitivity (0.75), and specificity (0.80). The FTND has  
7  
8 six items, with a total score ranging from 0-10 to measure nicotine dependence. A total FTND  
9  
10 score of five indicates moderate nicotine dependence, a score of 6-7 indicates high nicotine  
11  
12 dependence, and a score of 8-10 indicates very high nicotine dependence. Patients were also  
13  
14 asked about their reasons for smoking tobacco (41).  
15  
16  
17  
18  
19

20 *Cannabis and shisha use:* Use of both substances and their frequency were assessed.  
21  
22

23 *Khat use:* - Khat use was assessed by self-reported questionnaire. Since there is no standardized  
24  
25 questionnaire for khat use, patterns, and reasons of khat use were assessed by using a structured  
26  
27 questionnaire which was developed in the context of a literature review. Any consumption of  
28  
29 khat in the last one month was considered as current khat use. Frequent khat use (using khat  
30  
31 daily and 2-3 times per week) and using more than one bundle of khat per day was considered as  
32  
33 khat use disorder.  
34  
35  
36  
37

### 38 **Outcome variable**

39  
40

41 *Adherence:* Adherence status of tuberculosis patients was assessed by Direct Observed  
42  
43 Treatment (DOT) (based on missing appointments) and pills counts. In this study, adherence is  
44  
45 defined as taking medication regularly and attending follow-up according to appointments and  
46  
47 national guideline for tuberculosis in Ethiopia (12). In this study, non-adherence is defined as  
48  
49 missing at least one follow-up appointment during DOT. Non-adherence during intensive phase  
50  
51 is defined as missing at least one dose of the prescribed anti-TB medication and noted separately.  
52  
53  
54  
55  
56  
57

1  
2  
3 Adherence was assessed at baseline (beginning of intensive phase), at second month (end of  
4 intensive phase), and at end of 6 month (end of continuation phase).  
5  
6  
7

### 8 **Explanatory variables**

9

10  
11 *Socio-demographic variables:* Age, sex, marital status, level of education, religion, ethnicity,  
12 income, household size, occupation, place of residence, and living conditions were assessed  
13 using a structured questionnaire. Income was categorized considering that the minimum monthly  
14 wage for employees of governmental organization in Ethiopia of 1,214 Ethiopian birr (36.67  
15 Euros) (42). Then the monthly income of each patient was multiplied by 12 months to obtain the  
16 annual income, and we used a cutoff 14,568 Ethiopian birr (439.98 Euros).  
17  
18  
19  
20  
21  
22  
23  
24  
25

26 *Disease related factors:* Types of TB diagnosis (smear positive, smear negative, extrapulmonary  
27 TB, and MDR-TB) were collected from patients' charts.  
28  
29  
30

31 *Comorbidities:* All confirmed diagnoses of HIV, previous mental illness, hypertension, and  
32 diabetes mellitus were collected from patients' charts.  
33  
34  
35  
36

37 *Social support:* Oslo Social Support Scale (The Oslo 3-items) was used to collect data on the  
38 strength of social support. The Oslo-3 total score 3-8 indicate poor social support, 9-11 indicate  
39 moderate social support, and 12-14 indicate strong social support (43). The scale had been  
40 validated in Ethiopia among patients with tuberculosis (44). Social support was assessed at  
41 baseline, second month (at first follow up), and six month (at the completion of anti-TB  
42 treatment or second follow up).  
43  
44  
45  
46  
47  
48  
49  
50

51 *Food insecurity:* It was assessed using the Household Food Insecurity Access Scale (HFIAS) to  
52 determine whether the respondent has experienced any of the indicators of food insecurity in the  
53  
54  
55  
56  
57

1  
2  
3 previous month. Food secure if none of the items were endorsed on HFIAS, mild food insecurity  
4 if the respondent endorsed any of the items 1, 2, 3, and/or 4 but not the items 5 to 9, 'moderate  
5 food insecurity' if the respondent has endorsed items 5, and/or 6 but not the items 7 to 9, and  
6  
7  
8 'severe food insecurity' if the respondent has endorsed items 7, 8, and/or 9 (45). This tool had  
9  
10 been validated in Ethiopia among people living with HIV (46, 47). Food insecurity assessed at  
11  
12 baseline, second month (at first follow up), and six month (at the completion of anti-TB  
13  
14 treatment or second follow up).  
15  
16  
17  
18  
19

### 20 **Data collection procedures**

21  
22  
23 Before starting data collection, the questionnaires were pretested on a sample (5% of the total  
24 sample) of patients with TB who were on treatment at Agaro health center. Those patients who  
25 participated in the pretest were not included in the main cohort study. Data were collected by  
26  
27 trained health professionals working in the respective TB clinics. Also, district tuberculosis focal  
28 persons and other health professionals specifically trained for this purpose participated in the  
29  
30 supervision of data collection.  
31  
32  
33  
34  
35  
36  
37

### 38 **Data analysis**

39  
40  
41 Data were entered to Epi Data (version 3.1) and analyzed using R studio (1.2.1335). Missing  
42 values of income were excluded from the analysis. Participants' characteristics and study  
43 variables were presented using descriptive statistics. Generalized linear model was used to  
44  
45 examine the longitudinal effect of substance use disorders on medication adherence (binary  
46  
47 outcome). We used an intercept only model to investigate the trajectory of adherence over time  
48  
49 (model 0). Model 1 investigated the longitudinal effect of presence or absence of khat and  
50  
51 alcohol use disorders on adherence without adjusting for covariates, model 2 investigated the  
52  
53  
54  
55  
56  
57  
58  
59  
60

1  
2  
3 longitudinal effect of khat and alcohol on adherence while adjusting for the full set of covariates.  
4  
5 Model fit was examined with the Bayesian Information Criterion (BIC).  
6  
7

8 The covariate selection was based on a directed acyclic graph (DAG). DAGs are analytical  
9 method for visualizing hypotheses about causal relationships between exposure (substance use)  
10 and outcome (adherence) (48, 49). This approach has been shown to yield valid adjustment sets  
11 of variables and to avoid bias (50).  
12  
13  
14  
15  
16

### 17 **Ethical considerations**

18  
19 Ethical clearance was obtained from the Ethical Review Board of Jimma University  
20 (IHRPGC1095/2017) and LMU (Nr: 18-017). The study was discussed in detail and written  
21 informed consent was obtained from each participant. The anonymity of the study participants  
22 was kept at all stages of data processing and write-up of the manuscript. Patients who had  
23 alcohol and khat use disorder were advised to contact a mental health professional for further  
24 evaluation and treatment.  
25  
26  
27  
28  
29  
30  
31  
32  
33  
34  
35  
36  
37

### 38 **Patient and public involvement**

39 Patients were not involved in development of the research questions, study design, interpretation  
40 of results or writing of the manuscript.  
41  
42  
43  
44  
45  
46  
47  
48  
49  
50  
51  
52  
53  
54  
55  
56  
57  
58  
59  
60

## Results

### Socio-demographic characteristics

A total of 268 newly diagnosed patients (50% with substance use disorders, mean age 32.4, SD 14.4, 60.1% male) with tuberculosis were recruited. Of all patients, 10.8% (n=29), and 39.2% (n= 105) had alcohol and khat use disorders, respectively. No participant had tobacco, shisha, or cannabis use disorders. Age range was 18-80 years with 35% under 25 years (Refer to table 1). There were 22 missing data of annual income which we excluded from the analysis.

**Table1: Socio-demographic characteristics and substance use disorder among a cohort of patients on anti-tuberculosis treatment in Southwest Ethiopia, 2017/18 (n=268).**

| Variables  |                     | Total (%) | Substance use disorder |                          |                                    |
|------------|---------------------|-----------|------------------------|--------------------------|------------------------------------|
|            |                     |           | Baseline<br>N (%)      | First follow-up<br>N (%) | 2 <sup>nd</sup> follow up<br>N (%) |
| Gender     | Female              | 39.9      | 40(37.4)               | 35(32.7)                 | 45(42.1)                           |
|            | Male                | 60.1      | 94(58.4)               | 80(49.7)                 | 84(52.2)                           |
| Age        | 18-24               | 34.7      | 42(45.2)               | 31(33.3)                 | 38(40.9)                           |
|            | 25-34               | 32.5      | 35(40.2)               | 34(39.1)                 | 35(40.2)                           |
|            | 35-44               | 13.4      | 23(63.9)               | 20(55.6)                 | 22(61.1)                           |
|            | 45-54               | 10.1      | 17(63.0)               | 16(59.3)                 | 18(66.7)                           |
|            | 55-64               | 9.3       | 17(68.0)               | 14(56.0)                 | 16(64.0)                           |
| Occupation | Merchant            | 10.8      | 23(79.3)               | 19(65.5)                 | 20(69.0)                           |
|            | Farmer              | 34.3      | 57(62.0)               | 51(55.4)                 | 57(62.0)                           |
|            | Government employee | 39.2      | 37(35.2)               | 29(27.6)                 | 33(31.4)                           |
|            | Daily laborer       | 15.7      | 17(40.5)               | 16(38.1)                 | 19(45.2)                           |

|                       |                     |      |           |          |           |
|-----------------------|---------------------|------|-----------|----------|-----------|
| Education             | No formal education | 63·1 | 68(40·2)  | 59(34·9) | 62(36·7)  |
|                       | Literate            | 36·9 | 66(66·7)  | 56(56·6) | 67(67·7)  |
| Annual income in Birr | <14568              | 76·9 | 108(52·4) | 92(44·7) | 104(50·5) |
|                       | ≥14568              | 14·9 | 16(40·0)  | 17(42·5) | 18(45·0)  |
| Marital               | Single              | 36·2 | 85(54·1)  | 76(48·4) | 87(55·4)  |
|                       | Married             | 58·6 | 39(40·2)  | 32(33·0) | 34(35·1)  |
|                       | Divorced/widowed    | 5·2  | 10(71·4)  | 7(50·0)  | 8(57·1)   |
| Religion              | Orthodox            | 30·6 | 43(52·4)  | 27(32·9) | 43(52·4)  |
|                       | Muslim              | 61·6 | 89(53·9)  | 86(52·1) | 82(49·7)  |
|                       | Protestant/others   | 7·8  | 2(9·5)    | 2(9·5)   | 4(19·0)   |
| Ethnicity             | Amhara              | 22·0 | 27(45·8)  | 17(28·8) | 29(49·2)  |
|                       | Oromo               | 61·6 | 83(50·3)  | 82(49·7) | 79(47·9)  |
|                       | Tigre/Gurage        | 16·4 | 24(54·5)  | 16(36·4) | 21(47·7)  |
| Family size           | Less than five      | 67·5 | 89(49·2)  | 76(42·0) | 89(49·2)  |
|                       | Five or greater     | 32·5 | 45(51·7)  | 39(44·8) | 40(46·0)  |
| Residence             | Rural               | 47·4 | 72(56·7)  | 59(46·5) | 68(53·5)  |
|                       | Urban               | 52·6 | 62(44·0)  | 56(39·7) | 61(43·3)  |
| Type of tuberculosis  | Smear positive,     | 40·3 | 54(50·0)  | 43(39·8) | 46(42·6)  |
|                       | Smear negative      | 32·5 | 43(49·4)  | 39(44·8) | 46(52·9)  |
|                       | Extra pulmonary     | 27·2 | 37(50·7)  | 33(45·2) | 37(50·7)  |



### Clinical characteristics and non-adherence

Out of all patients, 40.3 % (n=108), 32.5 % (n=87), and 27.2 % (n=73) were diagnosed with smear positive, smear negative, and extra pulmonary TB respectively. At baseline, 3.7% (n=10) patients were diagnosed with HIV, and 7.1% (n=19) with other comorbidities. At baseline 9.7 % (n=26) were non-adherent to TB medication. At two and six months of assessment, 26.1% (n=70) and 27.6% (n=74) missed at least one dose of their medications respectively. .

The prevalence of non-adherence among patients with substance use disorder was 16.4% (n=22), 41.7 % (n=48), and 45.7% (n=59) at baseline, first, and second follow up respectively (See table 2).

**Table 2: Various characteristics by adherence to anti-TB medications at the three time point assessments among patients with tuberculosis in Southwest Ethiopia 2017/18 (n=268)**

| Variables              |        | Adherence to anti-TB at baseline |                       | Adherence to anti-TB at first follow-up |                       | Adherence to anti-TB at second follow-up |                       |
|------------------------|--------|----------------------------------|-----------------------|-----------------------------------------|-----------------------|------------------------------------------|-----------------------|
|                        |        | Adherent<br>N (%)                | Non-adherent<br>N (%) | Adherent<br>N (%)                       | Non-adherent<br>N (%) | Adherent<br>N (%)                        | Non-adherent<br>N (%) |
| Substance use disorder | No     | 130(97.0)                        | 4(3.0)                | 131(85.6)                               | 22(14.4)              | 124(89.2)                                | 15(10.8)              |
|                        | Yes    | 112(83.6)                        | 22(16.4)              | 67(58.3)                                | 48(41.7)              | 70(54.3)                                 | 59(45.7)              |
| Gender                 | Male   | 143(88.8)                        | 18(11.2)              | 112(69.6)                               | 49(30.4)              | 83(77.6)                                 | 24(22.4)              |
|                        | Female | 99(92.5)                         | 8(7.5)                | 86(80.4)                                | 21(19.6)              | 111(68.9)                                | 50(31.1)              |
| Age                    | 18-24  | 88(94.6)                         | 5(5.4)                | 72(77.3)                                | 21(22.7)              | 69(74.2)                                 | 24(25.8)              |
|                        | 25-34  | 79(90.8)                         | 8(9.2)                | 64(73.7)                                | 23(26.3)              | 67(77.0)                                 | 20(23.0)              |
|                        | 35-44  | 28(77.8)                         | 8(22.2)               | 24(66.7)                                | 12(33.3)              | 23(63.9)                                 | 13(36.1)              |

|                       |                       |           |          |           |          |           |          |
|-----------------------|-----------------------|-----------|----------|-----------|----------|-----------|----------|
|                       | 45-54                 | 24(88.9)  | 3(11.1)  | 21(77.8)  | 6(22.2)  | 19(70.4)  | 8(29.6)  |
|                       | 55-64                 | 23(92.0)  | 2(8.0)   | 17(68.0)  | 8(32.0)  | 16(64.0)  | 9(36.0)  |
| Occupation            | Merchant              | 22(75.9)  | 7(24.1)  | 17(58.6)  | 12(41.4) | 14(48.3)  | 15(51.7) |
|                       | Farmer                | 79(85.9)  | 23(14.1) | 66(71.7)  | 26(28.3) | 64(69.6)  | 28(30.4) |
|                       | Government Employee   | 21(95.5)  | 1(4.5)   | 79(75.2)  | 26(24.8) | 82(78.1)  | 23(21.9) |
|                       | Daily laborer         | 41(97.6)  | 1(2.4)   | 36(85.0)  | 6(14.3)  | 34(81.0)  | 8(19.0)  |
| Education             | No formal education   | 165(97.6) | 4(2.4)   | 145(85.8) | 24(14.2) | 139(82.2) | 30(17.8) |
|                       | Literate              | 77(77.8)  | 22(22.2) | 53(53.5)  | 46(46.5) | 55(55.6)  | 44(44.4) |
|                       | Tertiary              | 20(71.4)  | 8(28.6)  | 8(28.6)   | 20(71.4) | 10(35.7)  | 18(64.3) |
| Annual income in Birr | <14568                | 185(89.8) | 21(10.2) | 154(74.8) | 52(25.2) | 149(72.3) | 57(27.7) |
|                       | ≥14568                | 37(92.5)  | 3(7.5)   | 30(75.0)  | 10(25.0) | 31(77.5)  | 9(22.5)  |
| Food insecurity       | No                    | 129(94.9) | 7(5.1)   | 105(72.4) | 40(27.6) | 118(72.8) | 44(27.2) |
|                       | Middle/moderate       | 46(80.7)  | 11(19.3) | 29(70.0)  | 12(29.3) | 26(60.5)  | 17(39.5) |
|                       | Severe                | 67(89.3)  | 8(10.7)  | 64(78.0)  | 18(22.0) | 50(79.4)  | 13(20.6) |
| Marital status        | Single                | 92(94.8)  | 5(5.2)   | 109(69.4) | 48(30.6) | 80(82.5)  | 17(17.5) |
|                       | Married               | 140(89.2) | 17(10.8) | 80(85.8)  | 17(17.2) | 104(66.2) | 53(33.8) |
|                       | Divorced/widowed      | 10(71.4)  | 4(28.6)  | 9(64.6)   | 5(37.4)  | 10(71.4)  | 4(28.6)  |
| Religion              | Orthodox              | 74(90.2)  | 8(9.8)   | 63(76.8)  | 19(23.2) | 61(74.4)  | 21(25.6) |
|                       | Muslim                | 147(89.7) | 18(10.3) | 118(71.5) | 47(28.5) | 114(69.1) | 51(39.9) |
|                       | Protestant and others | 20(95.2)  | 1(4.8)   | 17(81.0)  | 4(19.0)  | 19(90.5)  | 2(9.5)   |
| Ethnicity             | Amhara                | 53(89.8)  | 6(10.2)  | 49(83.1)  | 10(16.9) | 48(81.4)  | 11(18.6) |

|                |                 |           |          |           |          |           |          |
|----------------|-----------------|-----------|----------|-----------|----------|-----------|----------|
|                | Oromo           | 160(90.9) | 16(9.1)  | 119(72.1) | 46(27.9) | 119(72.1) | 46(27.9) |
|                | Tigre/Gurage    | 29(87.9)  | 4(12.1)  | 30(68.2)  | 14(31.8) | 27(61.4)  | 17(38.6) |
| Family size    | Less than five  | 165(91.2) | 16(8.8)  | 132(72.9) | 49(27.1) | 137(75.7) | 44(24.3) |
|                | Five or greater | 77(88.5)  | 10(11.5) | 66(75.9)  | 21(24.1) | 57(64.5)  | 30(34.5) |
| Residence      | Rural           | 113(89.0) | 14(11.0) | 94(74.0)  | 33(26.0) | 93(73.2)  | 34(26.8) |
|                | Urban           | 129(91.5) | 12(8.5)  | 104(73.0) | 37(26.2) | 101(71.6) | 40(28.4) |
| Type of TB     | Smear positive  | 95(91.9)  | 13(8.1)  | 80(74.1)  | 28(25.9) | 78(72.2)  | 30(27.8) |
|                | Smear negative  | 81(9.1)   | 6(6.9)   | 66(75.9)  | 21(24.1) | 64(73.6)  | 23(26.4) |
|                | Extra pulmonary | 66(90.4)  | 7(9.6)   | 52(71.2)  | 21(28.8) | 52(71.2)  | 21(28.8) |
| HIV            | Seronegative    | 233(90.3) | 25(9.7)  | 190(74.2) | 66(25.8) | 183(73.5) | 66(26.5) |
|                | Seropositive    | 9(90.0)   | 1(10.0)  | 8(66.7)   | 4(33.3)  | 11(57.9)  | 8(42.1)  |
| Social support | Poor            | 83(89.2)  | 10(10.8) | 83(74.8)  | 28(25.2) | 96(68.6)  | 44(34.1) |
|                | Moderate        | 101(89.4) | 12(10.6) | 68(80.0)  | 17(20.0) | 58(78.4)  | 16(21.6) |
|                | Good            | 58(93.5)  | 4(6.5)   | 47(65.3)  | 25(34.7) | 40(74.1)  | 14(25.9) |

### Effect of substance use disorder on the adherence to anti-TB medications

The intercept only model (model 0) showed a significant decrease in the percentage of adherence over time (BIC= 642.5). Adding alcohol and khat use disorders (model 1) improved model fit (BIC=627.6): Patients with khat use disorder had a significantly higher probability of non-adherence over time (OR= 4.2, 95%CI=2.1-8.6). The odds of non-adherence among patients with alcohol use disorder (AUDs) was 3.3 times that of patients free of AUDs (OR=3.3, 95%CI=1.6-6.6). Adding covariates did not substantially change this association (OR= 2.8, 95%CI=2.0-3.8) and further improved model fit (BIC= 642.2). In the final model, khat use disorder (aOR= 3.8,

95%CI=1.8-8.0), or alcohol use disorder (aOR= 3.2, 95%CI=1.6-6.6), being educated (aOR=4.4, 95%CI=1.7-11.3), and being merchant (aOR=6.1, 95%CI= 1.2-30.8) were associated with decreasing adherence (See table 3). Patients with khat use disorder were 3.8 times more likely to be non-adherent to anti-TB medications than patients without khat use disorder. Also, participants whose occupation was merchant were 6.1 times more likely to be non-adherent to anti-TB medications compared to daily laborers.

**Table 3: Predictors of non-adherence to anti TB medications among patients with tuberculosis in Southwest Ethiopia 2017/2018 (n=268).**

| Variables      |                         | Model 0(Intercept only) |       | Model 1(khat and alcohol including age and gender) |         | Full model |          |
|----------------|-------------------------|-------------------------|-------|----------------------------------------------------|---------|------------|----------|
|                |                         | OR                      | 95%CI | OR                                                 | 95%CI   | aOR        | 95%CI    |
| Khat UD        | No                      | Reference               |       |                                                    |         |            |          |
|                | Yes                     | -                       | -     | 4.2                                                | 2.1-8.6 | 3.8        | 1.8-8.0  |
| AUDs           | No                      | Reference               |       |                                                    |         |            |          |
|                | Yes                     | -                       | -     | 3.3                                                | 1.6-6.6 | 3.2        | 1.6-6.6  |
| Age            | 18-24                   | Reference               |       |                                                    |         |            |          |
|                | 25-34                   | -                       | -     | 1.2                                                | 0.4-3.2 | -          | -        |
|                | 35-44                   | -                       | -     | 1.8                                                | 0.5-6.4 | -          | -        |
|                | 45-54                   | -                       | -     | 0.9                                                | 0.2-4.0 | -          | -        |
|                | ≥55                     | -                       | -     | 1.2                                                | 0.3-5.1 | -          | -        |
| Gender         | Female                  | Reference               |       |                                                    |         |            |          |
|                | Male                    | -                       | -     | 1.6                                                | 0.7-3.6 | -          | -        |
| Education      | No formal education     | Reference               |       |                                                    |         |            |          |
|                | Read and write/literate | -                       | -     | -                                                  | -       | 4.4        | 1.7-11.3 |
| Social support | Good                    | Reference               |       |                                                    |         |            |          |
|                | moderate                | -                       | -     | -                                                  | -       | 0.5        | 0.2-1.2  |
|                | Poor                    | -                       | -     | -                                                  | -       | 0.8        | 0.3-1.9  |

|            |                     |           |         |       |         |       |          |
|------------|---------------------|-----------|---------|-------|---------|-------|----------|
| Occupation | Daily laborer       | Reference |         |       |         |       |          |
|            | Farmer              | -         | -       | -     | -       | 2·1   | 0·5-8·0  |
|            | Government employee | -         | -       | -     | -       | 2·1   | 0·6-8·0  |
|            | Merchant            | -         | -       | -     | -       | 6·1   | 1·2-30·8 |
| Time T2    |                     | 2·7       | 2·0-3·6 | 2·7   | 2·0-3·6 | 2·8   | 2·0-3·8  |
| BIC        |                     | 642·5     |         | 672·6 |         | 642·2 |          |

## Discussion

This study conducted in patients undergoing standardized treatment for tuberculosis in Southwest Ethiopia revealed three important findings: 1) adherence to medication decreased over the course of treatment; 2) substance use disorders, particularly khat and alcohol contributed to this non-adherence; and 3) this association was independent of other factors such as education, social support, and occupation.

It is alarming that adherence to TB medication decreased over the course of treatment, as already shown by studies done in South Ethiopia (51), Northwest Ethiopia (52), and Addis Ababa (53) Ethiopia. Possible reasons for non-compliance are distance from the health institution that dispenses medications (13, 51), lack of knowledge about tuberculosis (51, 52), psychological distress (53), being busy with work (52), and alcohol intake (52). To solve the problem related to adherence, Ethiopian health authorities have reinforced their efforts to implement DOT programs throughout the whole treatment and all over the country starting from initiation to completion of treatment (12).

In this study, the prevalence of non-adherence to anti-TB medication in the first month of treatment was 9·7 % which is in line with a systematic review that found 10·0% of non-

1  
2  
3 adherence in the Amhara region (13, 54). The proportion of non-adherence to anti-TB  
4 medications during the first (26.1%) and second (27.6%) follow up was slightly higher than  
5 findings from South Ethiopia (24.5%) (51), Northwest Ethiopia (21.2%) (52), and Addis Ababa  
6 (19.5%) (53). This might be explained by the high proportion of persons with a substance use  
7 disorder in our study, in which we deliberately oversampled persons with SUD to maximize  
8 power. The discrepancy may be also due to patients in our study were using substances whereas  
9 in the systematic review there was no data regarding substance use.  
10  
11  
12  
13  
14  
15  
16  
17  
18  
19

20 In this study, the prevalence of non-adherence among patients with substance use disorder at  
21 baseline, first, and second follow up was 16.4%, 41.7%, and 45.7% respectively. This is in line  
22 with a study from the US (39%) (52, 55, 56).  
23  
24  
25  
26  
27

28 Moreover, this study provides the evidence that substance use disorders have a significant  
29 negative effect on adherence to anti-TB medications among patients with tuberculosis, which  
30 supports earlier findings from previous studies that found alcohol use disorder, tobacco  
31 dependence, and illicit drug use have a negative impact on adherence in Uzbekistan, Spain, and  
32 Morocco (57-59). This is also comparable with retrospective studies conducted in Russia and  
33 New York which found that alcohol use disorder and drug addiction were significantly  
34 associated with non-adherence to anti-TB medications (8, 9). Likewise, the finding of this study  
35 is in line with studies conducted in different parts of Ethiopia which found khat, alcohol, and  
36 tobacco are the main factors for non-adherence to anti-TB medications (52, 56, 60). In our study,  
37 patients with substance use disorder were more than two times more likely not to follow their  
38 medication plan than patients without substance use disorders. This finding is in line with the  
39 finding of a study conducted in US that found the risk of missing a DOT appointment was 2.6  
40  
41  
42  
43  
44  
45  
46  
47  
48  
49  
50  
51  
52  
53  
54  
55  
56  
57  
58  
59  
60

1  
2  
3 times higher among patients with substance use disorder than in patients without drug  
4  
5 consumption (55).  
6

7  
8 In our study, khat use disorder turned out to be the most stringent factor that decreased  
9 adherence. This confirms earlier findings from Yemen (61) and Ethiopia (14, 60). A plausible  
10 explanation is that khat chewing disrupts night sleep (62) causing patients to oversleep which  
11 may lead to missing of the DOT appointments at the health facility. Another reason may be that  
12 khat is common substance in Ethiopia, and therefore less attention is paid to its use. Since little is  
13 known about the effect of khat on patients with tuberculosis (14), it may be considered as part of  
14 a normal social interaction (61).  
15  
16  
17  
18  
19  
20  
21  
22  
23

24  
25 A higher level of education was associated with non-adherence to anti-TB medications in our  
26 study. This result confirms the findings from Yemen that found more educated patients were  
27 19% times less likely to be adherent to their medication (61). Also, a study from Ethiopia  
28 showed that attending primary education was associated with non-adherence to anti-TB  
29 medications (60). Our findings are contrary to previous studies which have suggested that lower  
30 or no formal education decreases adherence to TB medication (13, 63). Our finding seems  
31 counterintuitive. However, our results are likely to be related to findings from a study indicating  
32 that persons with higher educational attainment might be reluctant to accept DOTS regimes (64).  
33  
34 Daily visits to the health facility have been reported as time consuming and probably  
35 stigmatizing for patients with a job (65). In this study, being merchant was associated with poor  
36 adherence to anti-TB medications. This might be due to patients miss their medications because  
37 of busy working schedule, but this needs further investigation.  
38  
39  
40  
41  
42  
43  
44  
45  
46  
47  
48  
49  
50  
51  
52  
53  
54  
55  
56  
57  
58  
59  
60

## Limitations

This study has some limitations. Due to social desirability, patients might minimize reporting of the amount and frequency of substance they were using. Also, measuring adherence based on pills count may not reflect the real adherence situation since some patients might not bring all leftover medications during the follow up. Likewise, follow up and data collections have been carried out by health professionals working in the respective TB clinics which might have biased their assessment of adherence. However, overestimating adherence may have biased our results towards a null effect and led to underestimating the effect of substance use disorders, so we are confident that our estimates are conservative. The participation of district tuberculosis focal persons and other health professionals in the supervision of data collection might have also introduced bias.

Furthermore, hospitalized patients, patients on re-treatment, and patients with MDR-TB were not included in this study, so that the results cannot be generalized for these patients. However, MDR-TB patients are under special treatment and surveillance so that including this group of patients might have biased the results. Finally, we did not assess the reasons for non-adherence. This should be part of a separate study going more into the details of the situation of persons with khat and alcohol problems.

## Strengths

The specific strengths of this study are the prospective cohort design, longitudinal data collection, including patients from urban and rural health institutions, intensive training given for data collectors, multi-center data collection, and the use of standardized instruments to assess exposure, outcomes, and explanatory variables.



## Conclusions

Substance use disorders predict greater likelihood of anti-TB medication non-adherence among TB patients. Also, khat and alcohol use disorders were the main risk factors for anti-TB medication adherence. This finding implies the importance of integrating substance use disorders screening and treatment into the existing tuberculosis services to reduce the effect of substances on treatment outcomes including adherence.

## Ethics approval and consent to participate

Ethical clearance was obtained from the ethical review committee of Jimma University, Institute of Health. Written informed consent was obtained from each participant before participation. Information obtained in due course was kept confidentially

## Consent for publication

Not applicable.

## Competing of interest

All authors declare that they have no conflict of interests.

## Funding

The study was funded by Jimma University Institute of Health with the grant number of IHRPGC 1095/2017, Institute of Psychiatric Phenomics and Genomics (IPPG) with the grant number of 15106202/2018, and individual throughout data collection. The funders had no role in this study including interpretation and preparation of the manuscript.

## Authors' contribution

1  
2  
3 MS contributed to the conceptualization, design, statistical analysis, and manuscript preparation.  
4  
5 MT, KA, WK, ET, YY, RS, and EG contributed to the design, analysis, and review of the  
6  
7 manuscript.  
8  
9

## 10 **Author affiliations**

11  
12  
13  
14 <sup>1</sup> Department of Psychiatry, Medical Faculty, Jimma University, Jimma Ethiopia.

15  
16  
17 <sup>2</sup> Department of Psychiatry, St. Paul's Hospital Millennium Medical College, Addis Ababa, Ethiopia

18  
19  
20 <sup>3</sup> Department of Psychiatry and Psychotherapy, LMU Munich, Germany

21  
22 <sup>4</sup> Institute of Psychiatric Phenomics and Genomics (IPPG), University Hospital, LMU Munich, Germany

23  
24  
25 <sup>5</sup>Department of Forensic Psychiatry, Isar Amper Klinikum, Munich, Germany

26  
27  
28 <sup>6</sup> Institute for Medical Information Processing, Biometrics and Epidemiology, LMU Munich, Munich, Germany

29  
30  
31 <sup>7</sup> Institute for Medical Information Processing, Biometrics and Epidemiology, LMU Munich, Munich, Germany

32  
33  
34 <sup>8</sup>Center for International Health, Ludwig Maxmillians University, Munich, Germany

## 35 **Acknowledgment**

36  
37  
38  
39 We are grateful to the study participants for sacrificing their time to participate in the study. Our  
40  
41 gratitude is extended to Jimma University for funding the project. We are also grateful to IPPG  
42  
43 for funding part of the project. Our gratitude also extends to Dr. Michael Odenwald, who  
44  
45 contributed money from his pocket to support the project.  
46  
47  
48

## 49 **Availability of data**

50  
51  
52 It will be available upon official request from interested individuals or organizations.  
53  
54  
55  
56  
57

## References

1. Global tuberculosis report 2018. Geneva: World Health Organization; 2018. Licence: CC BY-NC-SA 3.0 IGO. [https://www.who.int/tb/publications/global\\_report/en/](https://www.who.int/tb/publications/global_report/en/) accessed on 24/07/2019
2. Grobusch MP, Kapata N. Global burden of tuberculosis: where we are and what to do. *Lancet Infect Dis.* 2018; 18(12):1291-3.
3. Patel V, Chisholm D, Dua T, Laxminarayan R, Medina-Mora ME. Mental, Neurological, and Substance Use Disorders: Disease Control Priorities, Third Edition (Volume 4). Washington (DC): The International Bank for Reconstruction and Development / The World Bank, 2016.
4. Floyd K, Glaziou P, Zumla A, Raviglione M. The global tuberculosis epidemic and progress in care, prevention, and research: an overview in year 3 of the end TB era. *Lancet Respir Med.* 2018; 6(4):299-314.
5. Global tuberculosis report 2016, Geneva, World Health Organization; 2016. <https://apps.who.int/medicinedocs/en/d/Js23098en/> accessed on 24/07/2019.
6. Dodor EA. Tuberculosis treatment default at the communicable diseases unit of Effia-Nkwanta Regional Hospital: a 2-year experience. *Int J Tuberc Lung Dis.* 2004; 8(11):1337-41.
7. Global tuberculosis report 2013. Geneva, World Health Organization; 2013. <http://apps.who.int/medicinedocs/en/m/abstract/Js21534en/> accessed on 25/07/2019

- 1  
2  
3 8. Gelmanova IY, Keshavjee S, Golubchikova VT, Berezina VI, Strelis AK, Yanova GV, et al.  
4  
5 Barriers to successful tuberculosis treatment in Tomsk, Russian Federation: non-adherence,  
6  
7 default and the acquisition of multidrug resistance. *Bulletin of the World Health Organization*.  
8  
9 2007; 85(9):703-11.  
10  
11
- 12  
13 9. Mekonnen HS, Azagew AW. Non-adherence to anti-tuberculosis treatment, reasons and  
14  
15 associated factors among TB patients attending at Gondar town health centers, Northwest  
16  
17 Ethiopia. *BMC Res Notes*. 2018; 11: 691.  
18  
19
- 20  
21 10. Mohd Shariff N, Shah SA, Kamaludin F. Predictors of death among drug-resistant  
22  
23 tuberculosis patients in Kuala Lumpur, Malaysia: A retrospective cohort study from 2009 to  
24  
25 2013. *J Glob Antimicrob Resist*. 2016; 6:102-7.  
26  
27
- 28  
29 11. Waitt CJ, Squire SB. A systematic review of risk factors for death in adults during and  
30  
31 after tuberculosis treatment. *Int J Tuberc Lung Dis*. 2011; 15(7):871-85.  
32  
33
- 34  
35 12. Federal Democratic Republic of Ethiopia MoH. Guidelines for clinical and programmatic  
36  
37 management of Tb, leprosy and Tb/HIV in Ethiopia fifth edition: MoH; 2012.  
38  
39
- 40  
41 13. Zegeye A, Dessie G, Wagnew F, Gebrie A, Islam SMS, Tesfaye B, et al. Prevalence and  
42  
43 determinants of anti-tuberculosis treatment non-adherence in Ethiopia: A systematic review and  
44  
45 meta-analysis. *PLoS One*. 2019; 14(1):e0210422.  
46  
47
- 48  
49 14. Ambaw F, Mayston R, Hanlon C, Medhin G, Alem A. Untreated depression and  
50  
51 tuberculosis treatment outcomes, quality of life and disability, Ethiopia. *Bulletin of the World*  
52  
53 *Health Organization*. 2018; 96(4):243-55.  
54  
55  
56  
57

- 1  
2  
3 15. Pelissari DM, Diaz-Quijano FA. Impact of alcohol disorder and the use of illicit drugs on  
4 tuberculosis treatment outcomes: a retrospective cohort study. *Arch Public Health*. 2018; 76:45.  
5  
6  
7  
8  
9 16. Silva MR, Pereira JC, Costa RR, Dias JA, Guimaraes MDC, Leite ICG. Drug addiction  
10 and alcoholism as predictors for tuberculosis treatment default in Brazil: a prospective cohort  
11 study. *Epidemiol Infect*. 2017; 145(16):3516-24.  
12  
13  
14  
15  
16 17. Deiss RG, Rodwell TC, Garfein RS. Tuberculosis and illicit drug use: review and update.  
17 *Clin Infect Dis*. 2009 ;48(1):72-82.  
18  
19  
20  
21 18. Oeltmann JE, Kammerer JS, Pevzner ES, Moonan PK. Tuberculosis and substance abuse in  
22 the United States, 1997-2006. *Arch Intern Med*. 2009. 26;169(2):189-97  
23  
24  
25  
26  
27 19. O'Connell R, Chishinga N, Kinyanda E, Patel V, Ayles H, Weiss HA, et al. Prevalence  
28 and correlates of alcohol dependence disorder among TB and HIV infected patients in Zambia.  
29 *PloS one*. 2013; 8(9):e74406.  
30  
31  
32  
33  
34  
35 20. Christensen AS, Roed C, Andersen PH, Andersen AB, Obel N. Long-term mortality in  
36 patients with pulmonary and extrapulmonary tuberculosis: a Danish nationwide cohort study.  
37 *Clinical epidemiology*. 2014; 6:405-21.  
38  
39  
40  
41  
42  
43 21. Fleming MF, Krupitsky E, Tsoy M, Zvartau E, Brazhenko N, Jakubowiak W, et al.  
44 Alcohol and drug use disorders, HIV status and drug resistance in a sample of Russian TB  
45 patients. *The international journal of tuberculosis and lung disease: the official journal of the*  
46 *International Union against Tuberculosis and Lung Disease*. 2006; 10(5):565-70.  
47  
48  
49  
50  
51  
52  
53  
54  
55  
56  
57  
58  
59  
60

- 1  
2  
3 22. Skrahina A, Hurevich H, Zalutskaya A, Sahalchyk E, Astrauko A, Hoffner S, et al.  
4  
5 Multidrug-resistant tuberculosis in Belarus: the size of the problem and associated risk factors.  
6  
7 Bulletin of the World Health Organization. 2013; 91(1):36-45.  
8  
9  
10  
11 23. Luqman W, Danowski TS. The use of khat (*Catha edulis*) in Yemen. Social and medical  
12  
13 observations. *Ann Intern Med*. 1976;85(2):246-9.  
14  
15  
16 24. Gebissa E. Khat in the Horn of Africa: historical perspectives and current trends. *J*  
17  
18 *Ethnopharmacol*. 2010; 132(3):607-14.  
19  
20  
21 25. Dhaifalah I, Santavy J. Khat habit and its health effect. A natural amphetamine. *Biomed*  
22  
23 *Pap Med Fac Univ Palacky Olomouc Czech Repub*. 2004; 148(1):11-5.  
24  
25  
26  
27 26. Alfaifi H, Abdelwahab SI, Mohan S, Elhassan Taha MM, Syame SM, Shaala LA, et al.  
28  
29 *Catha edulis* Forsk. (Khat): Evaluation of its Antidepressant-like Activity. *Pharmacognosy*  
30  
31 *magazine*. 2017; 13(Suppl 2):S354-s8.  
32  
33  
34  
35 27. Wolde D, Tadesse M, Abdella K, Abebe G, Ali S. Tuberculosis among Jimma University  
36  
37 Undergraduate Students: First Insight about the Burden of Tuberculosis in Ethiopia Universities-  
38  
39 Cross-Sectional Study. *Int J Bacteriol*. 2017;9840670.  
40  
41  
42  
43 28. Alemu YM, Awoke W, Wilder-Smith A. Determinants for tuberculosis in HIV-infected  
44  
45 adults in Northwest Ethiopia: a multicentre case-control study. *BMJ Open*. 2016; 6(4):e009058.  
46  
47  
48 29. Jaber AA, Khan AH, Sulaiman SA, Ahmad N. Role of socio-demographical factors on  
49  
50 tuberculosis outcome in Yemen. *International journal of mycobacteriology*. 2016; 5(1):S20.  
51  
52  
53  
54  
55  
56  
57  
58  
59  
60

- 1  
2  
3 30. Legesse M, Ameni G, Mamo G, Medhin G, Shawel D, Bjune G, et al. Knowledge and  
4 perception of pulmonary tuberculosis in pastoral communities in the middle and Lower Awash  
5 Valley of Afar region, Ethiopia. *BMC Public Health*. 2010; 10:187.  
6  
7  
8  
9  
10  
11 31. Alvi A, Rizwan M, Sunosi RA, Bin Ali Jerah A. Does khat chewing increases the risk of  
12 *Mycobacterium tuberculosis* infection by macrophage immune modulation? *Med Hypotheses*.  
13 2014; 82(6):667-9.  
14  
15  
16  
17  
18 32. Jaber AA, Khan AH, Syed Sulaiman SA, Ahmad N, Anaam MS. Evaluation of Health-  
19 Related Quality of Life among Tuberculosis Patients in Two Cities in Yemen. *PLoS One*. 2016;  
20 11(6):e0156258.  
21  
22  
23  
24  
25  
26 33. Jaber AAS, Khan AH, Sulaiman SAS. Evaluating treatment outcomes and durations  
27 among cases of smear-positive pulmonary tuberculosis in Yemen: a prospective follow-up study.  
28 *J Pharm Policy Pract*. 2017; 10:36.  
29  
30  
31  
32  
33  
34 34. Alvi A, Fatima N, Jerah AA, Rizwan M, Hobani YH, Sunosi RA, et al. Correlation  
35 between Resistin, Tuberculosis and Khat Addiction: A Study from South Western Province of  
36 Saudi Arabia. *PLoS One*. 2015; 10(10):e0140245.  
37  
38  
39  
40  
41  
42 35. Anaam MS I, Al Serouri AW, Aldobhani A. Factors affecting patients' compliance to  
43 anti-tuberculosis treatment in Yemen: *JPHSR*; 2013.  
44  
45  
46  
47 36. Cox G, Rampes H. Adverse effects of khat: a review. *Advances in Psychiatric Treatment*.  
48 2018; 9(6):456-63.  
49  
50  
51  
52 37. EPIInfoTM. <http://apps.who.int/medicinedocs/en/m/abstract/Js21534en/> accessed on  
53 19/08/2019  
54  
55  
56  
57  
58  
59  
60

1  
2  
3 38. Babor TF, Higgins-Biddle JC, Saunders JB, Monteiro MG. The Alcohol Use Disorders  
4 Identification Test Guidelines for Use in Primary Care. World Health Organization. 2001.

5  
6  
7  
8 [https://apps.who.int/iris/bitstream/handle/10665/67205/WHO\\_MSD\\_MSB\\_01.6a.pdf;jsessionid=  
9 B5D5F8F1F1B82FE622D04E8F02635F05?sequence=1](https://apps.who.int/iris/bitstream/handle/10665/67205/WHO_MSD_MSB_01.6a.pdf;jsessionid=B5D5F8F1F1B82FE622D04E8F02635F05?sequence=1) accessed on 20/07/2019.

10  
11  
12  
13  
14 39. Babor TF, Higgins-Biddle JC, Saunders JB, Monteiro MG. The Alcohol Use Disorders  
15 Identification Test Guidelines for Use in Primary Care. World Health Organization. 2001.

16  
17  
18  
19 40. Soboka M, Tesfaye M, Feyissa GT, Hanlon C. Alcohol use disorders and associated  
20 factors among people living with HIV who are attending services in south west Ethiopia. BMC  
21 research notes. 2014; 7:828.

22  
23  
24  
25  
26  
27 41. Mikami I, Akechi T, Kugaya A, Okuyama T, Nakano T, Okamura H, et al. Screening for  
28 nicotine dependence among smoking-related cancer patients. Japanese journal of cancer research  
29 : Gann. 1999; 90(10):1071-5.

30  
31  
32  
33  
34  
35 42. Average Salary in Ethiopia. [http://www.salaryexplorer.com/salary-  
36 survey.php?loc=69&loctype=1](http://www.salaryexplorer.com/salary-survey.php?loc=69&loctype=1) accessed on 09/07/2019.

37  
38  
39  
40 43. Instrument Manual: Oslo-3 Social Support Scale (OSS-3)2006.  
41 [https://circabc.europa.eu/webdav/CircaBC/ESTAT/healthtf/Library/ehis\\_wave\\_2/methodology\\_e  
42 his/development/instruments/Manual\\_OSS\\_3.pdf](https://circabc.europa.eu/webdav/CircaBC/ESTAT/healthtf/Library/ehis_wave_2/methodology_ehis/development/instruments/Manual_OSS_3.pdf) , Accessed on 08/06/2019

43  
44  
45  
46  
47  
48 44. Duko B, Gebeyehu A, Ayano G. Prevalence and correlates of depression and anxiety  
49 among patients with tuberculosis at WolaitaSodo University Hospital and Sodo Health Center,  
50 WolaitaSodo, South Ethiopia, Cross sectional study. BMC psychiatry. 2015; 15:214.



- 1  
2  
3 45. Coates J SA, Bilinsky P. Household Food Insecurity Access Scale (HFIAS) for  
4 measurement of food access: Indicator guide (V.3): Washington, D.C.: FHI 360/FANTA; 2007.  
5  
6  
7  
8 [http://www.fao.org/fileadmin/user\\_upload/eufao-fsi4dm/doc-training/hfias.pdf](http://www.fao.org/fileadmin/user_upload/eufao-fsi4dm/doc-training/hfias.pdf) accessed on  
9  
10 10/01/2017  
11  
12  
13  
14 46. Tesfaye M, Kaestel P, Olsen MF, Girma T, Yilma D, Abdissa A, et al. Food insecurity,  
15 mental health and quality of life among people living with HIV commencing antiretroviral  
16 treatment in Ethiopia: a cross-sectional study. *Health and quality of life outcomes*. 2016; 14:37.  
17  
18  
19  
20  
21 47. Maes KC, Hadley C, Tesfaye F, Shifferaw S, Tesfaye YA. Food insecurity among  
22 volunteer AIDS caregivers in Addis Ababa, Ethiopia was highly prevalent but buffered from the  
23 2008 food crisis. *The Journal of nutrition*. 2009; 139(9):1758-64.  
24  
25  
26  
27  
28  
29 48. Greenland S, Pearl J, Robins JM. Causal diagrams for epidemiologic research.  
30 *Epidemiology*. 1999; 10(1):37-48.  
31  
32  
33  
34  
35 49. Textor J, Hardt J, Knuppel S. DAGitty: a graphical tool for analyzing causal diagrams.  
36 *Epidemiology*. 2011; 22(5):745.  
37  
38  
39  
40 50. Shrier I, Platt RW. Reducing bias through directed acyclic graphs. *BMC Med Res*  
41 *Methodol*. 2008; 8:70.  
42  
43  
44  
45 51. Woimo TT, Yimer WK, Bati T, Gesesew HA. The prevalence and factors associated for  
46 anti-tuberculosis treatment non-adherence among pulmonary tuberculosis patients in public  
47 health care facilities in South Ethiopia: a cross-sectional study. *BMC Public Health*. 2017;  
48 17(1):269.  
49  
50  
51  
52  
53  
54  
55  
56  
57  
58  
59  
60

- 1  
2  
3 52. Mekonnen HS, Azagew AW. Non-adherence to anti-tuberculosis treatment, reasons and  
4 associated factors among TB patients attending at Gondar town health centers, Northwest  
5 Ethiopia. *BMC research notes*. 2018; 11(1):691.  
6  
7  
8  
9  
10  
11 53. Tola HH, Garmaroudi G, Shojaeizadeh D, Tol A, Yekaninejad MS, Ejeta LT, et al. The  
12 Effect of Psychosocial Factors and Patients' Perception of Tuberculosis Treatment Non-  
13 Adherence in Addis Ababa, Ethiopia. *Ethiopian journal of health sciences*. 2017; 27(5):447-58.  
14  
15  
16  
17  
18 54. Adane AA, Alene KA, Koye DN, Zeleke BM. Non-adherence to anti-tuberculosis  
19 treatment and determinant factors among patients with tuberculosis in northwest Ethiopia. *PLoS*  
20 *One*. 2013; 8(11):e78791.  
21  
22  
23  
24  
25  
26 55. Ricks PM, Hershov RC, Rahimian A, Huo D, Johnson W, Prachand N, et al. A  
27 randomized trial comparing standard outcomes in two treatment models for substance users with  
28 tuberculosis. *Int J Tuberc Lung Dis*. 2015; 19(3):326-32.  
29  
30  
31  
32  
33  
34 56. Sahile Z, Yared A, Kaba M. Patients' experiences and perceptions on associates of TB  
35 treatment adherence: a qualitative study on DOTS service in public health centers in Addis  
36 Ababa, Ethiopia. *BMC Public Health*. 2018; 18(1):462.  
37  
38  
39  
40  
41  
42 57. Hasker E, Khodjikhhanov M, Usarova S, Asamidinov U, Yuldashova U, van der Werf MJ,  
43 et al. Default from tuberculosis treatment in Tashkent, Uzbekistan; who are these defaulters and  
44 why do they default? *BMC Infect Dis*. 2008; 8:97.  
45  
46  
47  
48  
49  
50 58. Cayla JA, Caminero JA, Rey R, Lara N, Valles X, Galdos-Tanguis H. Current status of  
51 treatment completion and fatality among tuberculosis patients in Spain. *Int J Tuberc Lung Dis*.  
52 2004; 8(4):458-64.  
53  
54  
55  
56  
57

- 1  
2  
3 59. Dooley KE, Lahlou O, Ghali I, Knudsen J, Elmessaoudi MD, Cherkaoui I, et al. Risk  
4 factors for tuberculosis treatment failure, default, or relapse and outcomes of retreatment in  
5 Morocco. *BMC Public Health*. 2011; 11:140.  
6  
7  
8  
9  
10  
11 60. Tesfahuneygn G, Medhin G, Legesse M. Adherence to Anti-tuberculosis treatment and  
12 treatment outcomes among tuberculosis patients in Alamata District, northeast Ethiopia. *BMC*  
13 *research notes*. 2015; 8:503.  
14  
15  
16  
17  
18 61. Anaam MS, Mohamed Ibrahim MI, Al Serouri AW, Aldobhani A. Factors affecting  
19 patients' compliance to anti-tuberculosis treatment in Yemen. *Journal of Pharmaceutical Health*  
20 *Services Research*. 2013; 4(2):115-22.  
21  
22  
23  
24  
25  
26 62. Adane K, Spigt M, Ferede S, Asmelash T, Abebe M, Dinant GJ. Half of Pulmonary  
27 Tuberculosis Cases Were Left Undiagnosed in Prisons of the Tigray Region of Ethiopia:  
28 Implications for Tuberculosis Control. *PLoS One*. 2016; 11(2):e0149453.  
29  
30  
31  
32  
33  
34 63. Fang XH, Dan YL, Liu J, Jun L, Zhang ZP, Kan XH, et al. Factors influencing  
35 completion of treatment among pulmonary tuberculosis patients. *Patient Prefer Adherence*. 2019;  
36 13:491-6.  
37  
38  
39  
40  
41  
42 64. Kawatsu L, Uchimura K, Ohkado A, Kato S. A combination of quantitative and  
43 qualitative methods in investigating risk factors for lost to follow-up for tuberculosis treatment in  
44 Japan - Are physicians and nurses at a particular risk? *PLoS One*. 2018; 13(6):e0198075.  
45  
46  
47  
48  
49  
50 65. Gebreweld FH, Kifle MM, Gebremicheal FE, Simel LL, Gezae MM, Ghebreyesus SS, et  
51 al. Factors influencing adherence to tuberculosis treatment in Asmara, Eritrea: a qualitative  
52 study. *J Health Popul Nutr*. 2018; 37(1):1.  
53  
54  
55  
56  
57  
58  
59  
60

# Reporting checklist for cohort study.

Based on the STROBE cohort guidelines.

## Instructions to authors

Complete this checklist by entering the page numbers from your manuscript where readers will find each of the items listed below.

Your article may not currently address all the items on the checklist. Please modify your text to include the missing information. If you are certain that an item does not apply, please write "n/a" and provide a short explanation.

Upload your completed checklist as an extra file when you submit to a journal.

In your methods section, say that you used the STROBE cohort reporting guidelines, and cite them as:

von Elm E, Altman DG, Egger M, Pocock SJ, Gøtzsche PC, Vandenbroucke JP. The Strengthening the Reporting of Observational Studies in Epidemiology (STROBE) Statement: guidelines for reporting observational studies.

|                           |                     |                                                                                    | Page<br>Number |
|---------------------------|---------------------|------------------------------------------------------------------------------------|----------------|
| <b>Title and abstract</b> |                     |                                                                                    |                |
| Title                     | <a href="#">#1a</a> | Indicate the study's design with a commonly used term in the title or the abstract | 1              |
| Abstract                  | <a href="#">#1b</a> | Provide in the abstract an informative and balanced summary                        | 2,3            |

of what was done and what was found

## Introduction

Background / [#2](#) Explain the scientific background and rationale for the 4-6  
 rationale investigation being reported

Objectives [#3](#) State specific objectives, including any prespecified 6  
 hypotheses

## Methods

Study design [#4](#) Present key elements of study design early in the paper 6

Setting [#5](#) Describe the setting, locations, and relevant dates, including 6  
 periods of recruitment, exposure, follow-up, and data collection

Eligibility criteria [#6a](#) Give the eligibility criteria, and the sources and methods of 6  
 selection of participants. Describe methods of follow-up.

Eligibility criteria [#6b](#) For matched studies, give matching criteria and number of  
 exposed and unexposed

Variables [#7](#) Clearly define all outcomes, exposures, predictors, potential 7-10  
 confounders, and effect modifiers. Give diagnostic criteria, if  
 applicable

Data sources / [#8](#) For each variable of interest give sources of data and details of 7-10  
 measurement methods of assessment (measurement). Describe  
 comparability of assessment methods if there is more than one  
 group. Give information separately for for exposed and  
 unexposed groups if applicable.

|    |                |                      |                                                                   |        |
|----|----------------|----------------------|-------------------------------------------------------------------|--------|
| 1  | Bias           | <a href="#">#9</a>   | Describe any efforts to address potential sources of bias         | 10,11  |
| 2  |                |                      |                                                                   |        |
| 3  |                |                      |                                                                   |        |
| 4  | Study size     | <a href="#">#10</a>  | Explain how the study size was arrived at                         | 7      |
| 5  |                |                      |                                                                   |        |
| 6  |                |                      |                                                                   |        |
| 7  | Quantitative   | <a href="#">#11</a>  | Explain how quantitative variables were handled in the            | 10, 11 |
| 8  | variables      |                      | analyses. If applicable, describe which groupings were chosen,    |        |
| 9  |                |                      | and why                                                           |        |
| 10 |                |                      |                                                                   |        |
| 11 |                |                      |                                                                   |        |
| 12 |                |                      |                                                                   |        |
| 13 |                |                      |                                                                   |        |
| 14 |                |                      |                                                                   |        |
| 15 | Statistical    | <a href="#">#12a</a> | Describe all statistical methods, including those used to control | 10,11  |
| 16 | methods        |                      | for confounding                                                   |        |
| 17 |                |                      |                                                                   |        |
| 18 |                |                      |                                                                   |        |
| 19 |                |                      |                                                                   |        |
| 20 | Statistical    | <a href="#">#12b</a> | Describe any methods used to examine subgroups and                |        |
| 21 | methods        |                      | interactions                                                      |        |
| 22 |                |                      |                                                                   |        |
| 23 |                |                      |                                                                   |        |
| 24 |                |                      |                                                                   |        |
| 25 |                |                      |                                                                   |        |
| 26 | Statistical    | <a href="#">#12c</a> | Explain how missing data were addressed                           | 10     |
| 27 | methods        |                      |                                                                   |        |
| 28 |                |                      |                                                                   |        |
| 29 |                |                      |                                                                   |        |
| 30 |                |                      |                                                                   |        |
| 31 | Statistical    | <a href="#">#12d</a> | If applicable, explain how loss to follow-up was addressed        |        |
| 32 | methods        |                      |                                                                   |        |
| 33 |                |                      |                                                                   |        |
| 34 |                |                      |                                                                   |        |
| 35 |                |                      |                                                                   |        |
| 36 | Statistical    | <a href="#">#12e</a> | Describe any sensitivity analyses                                 |        |
| 37 | methods        |                      |                                                                   |        |
| 38 |                |                      |                                                                   |        |
| 39 |                |                      |                                                                   |        |
| 40 |                |                      |                                                                   |        |
| 41 |                |                      |                                                                   |        |
| 42 | <b>Results</b> |                      |                                                                   |        |
| 43 |                |                      |                                                                   |        |
| 44 |                |                      |                                                                   |        |
| 45 | Participants   | <a href="#">#13a</a> | Report numbers of individuals at each stage of study—eg           | 12     |
| 46 |                |                      | numbers potentially eligible, examined for eligibility, confirmed |        |
| 47 |                |                      | eligible, included in the study, completing follow-up, and        |        |
| 48 |                |                      | analysed. Give information separately for for exposed and         |        |
| 49 |                |                      | unexposed groups if applicable.                                   |        |
| 50 |                |                      |                                                                   |        |
| 51 |                |                      |                                                                   |        |
| 52 |                |                      |                                                                   |        |
| 53 |                |                      |                                                                   |        |
| 54 |                |                      |                                                                   |        |
| 55 |                |                      |                                                                   |        |
| 56 |                |                      |                                                                   |        |
| 57 | Participants   | <a href="#">#13b</a> | Give reasons for non-participation at each stage                  |        |
| 58 |                |                      |                                                                   |        |
| 59 |                |                      |                                                                   |        |
| 60 |                |                      |                                                                   |        |

|    |                   |                      |                                                                   |        |
|----|-------------------|----------------------|-------------------------------------------------------------------|--------|
| 1  | Participants      | <a href="#">#13c</a> | Consider use of a flow diagram                                    |        |
| 2  |                   |                      |                                                                   |        |
| 3  |                   |                      |                                                                   |        |
| 4  | Descriptive data  | <a href="#">#14a</a> | Give characteristics of study participants (eg demographic,       | 12, 13 |
| 5  |                   |                      | clinical, social) and information on exposures and potential      |        |
| 6  |                   |                      | confounders. Give information separately for exposed and          |        |
| 7  |                   |                      | unexposed groups if applicable.                                   |        |
| 8  |                   |                      |                                                                   |        |
| 9  |                   |                      |                                                                   |        |
| 10 |                   |                      |                                                                   |        |
| 11 |                   |                      |                                                                   |        |
| 12 |                   |                      |                                                                   |        |
| 13 |                   |                      |                                                                   |        |
| 14 | Descriptive data  | <a href="#">#14b</a> | Indicate number of participants with missing data for each        | 12     |
| 15 |                   |                      | variable of interest                                              |        |
| 16 |                   |                      |                                                                   |        |
| 17 |                   |                      |                                                                   |        |
| 18 |                   |                      |                                                                   |        |
| 19 | Descriptive data  | <a href="#">#14c</a> | Summarise follow-up time (eg, average and total amount)           |        |
| 20 |                   |                      |                                                                   |        |
| 21 |                   |                      |                                                                   |        |
| 22 |                   |                      |                                                                   |        |
| 23 | Outcome data      | <a href="#">#15</a>  | Report numbers of outcome events or summary measures              | 14, 15 |
| 24 |                   |                      | over time. Give information separately for exposed and            |        |
| 25 |                   |                      | unexposed groups if applicable.                                   |        |
| 26 |                   |                      |                                                                   |        |
| 27 |                   |                      |                                                                   |        |
| 28 |                   |                      |                                                                   |        |
| 29 |                   |                      |                                                                   |        |
| 30 | Main results      | <a href="#">#16a</a> | Give unadjusted estimates and, if applicable, confounder-         | 14-18  |
| 31 |                   |                      | adjusted estimates and their precision (eg, 95% confidence        |        |
| 32 |                   |                      | interval). Make clear which confounders were adjusted for and     |        |
| 33 |                   |                      | why they were included                                            |        |
| 34 |                   |                      |                                                                   |        |
| 35 |                   |                      |                                                                   |        |
| 36 |                   |                      |                                                                   |        |
| 37 |                   |                      |                                                                   |        |
| 38 |                   |                      |                                                                   |        |
| 39 |                   |                      |                                                                   |        |
| 40 | Main results      | <a href="#">#16b</a> | Report category boundaries when continuous variables were         |        |
| 41 |                   |                      | categorized                                                       |        |
| 42 |                   |                      |                                                                   |        |
| 43 |                   |                      |                                                                   |        |
| 44 |                   |                      |                                                                   |        |
| 45 | Main results      | <a href="#">#16c</a> | If relevant, consider translating estimates of relative risk into |        |
| 46 |                   |                      | absolute risk for a meaningful time period                        |        |
| 47 |                   |                      |                                                                   |        |
| 48 |                   |                      |                                                                   |        |
| 49 |                   |                      |                                                                   |        |
| 50 |                   |                      |                                                                   |        |
| 51 | Other analyses    | <a href="#">#17</a>  | Report other analyses done—e.g., analyses of subgroups and        |        |
| 52 |                   |                      | interactions, and sensitivity analyses                            |        |
| 53 |                   |                      |                                                                   |        |
| 54 |                   |                      |                                                                   |        |
| 55 |                   |                      |                                                                   |        |
| 56 | <b>Discussion</b> |                      |                                                                   |        |
| 57 |                   |                      |                                                                   |        |
| 58 |                   |                      |                                                                   |        |
| 59 |                   |                      |                                                                   |        |
| 60 |                   |                      |                                                                   |        |

|    |                          |                     |                                                                      |       |
|----|--------------------------|---------------------|----------------------------------------------------------------------|-------|
| 1  | Key results              | <a href="#">#18</a> | Summarise key results with reference to study objectives             | 19-21 |
| 2  |                          |                     |                                                                      |       |
| 3  |                          |                     |                                                                      |       |
| 4  | Limitations              | <a href="#">#19</a> | Discuss limitations of the study, taking into account sources of     | 21    |
| 5  |                          |                     | potential bias or imprecision. Discuss both direction and            |       |
| 6  |                          |                     | magnitude of any potential bias.                                     |       |
| 7  |                          |                     |                                                                      |       |
| 8  |                          |                     |                                                                      |       |
| 9  |                          |                     |                                                                      |       |
| 10 |                          |                     |                                                                      |       |
| 11 |                          |                     |                                                                      |       |
| 12 | Interpretation           | <a href="#">#20</a> | Give a cautious overall interpretation considering objectives,       | 19-21 |
| 13 |                          |                     | limitations, multiplicity of analyses, results from similar studies, |       |
| 14 |                          |                     | and other relevant evidence.                                         |       |
| 15 |                          |                     |                                                                      |       |
| 16 |                          |                     |                                                                      |       |
| 17 |                          |                     |                                                                      |       |
| 18 |                          |                     |                                                                      |       |
| 19 | Generalisability         | <a href="#">#21</a> | Discuss the generalisability (external validity) of the study        |       |
| 20 |                          |                     | results                                                              |       |
| 21 |                          |                     |                                                                      |       |
| 22 |                          |                     |                                                                      |       |
| 23 |                          |                     |                                                                      |       |
| 24 |                          |                     |                                                                      |       |
| 25 | <b>Other Information</b> |                     |                                                                      |       |
| 26 |                          |                     |                                                                      |       |
| 27 |                          |                     |                                                                      |       |
| 28 | Funding                  | <a href="#">#22</a> | Give the source of funding and the role of the funders for the       | 23    |
| 29 |                          |                     | present study and, if applicable, for the original study on which    |       |
| 30 |                          |                     | the present article is based                                         |       |
| 31 |                          |                     |                                                                      |       |
| 32 |                          |                     |                                                                      |       |
| 33 |                          |                     |                                                                      |       |
| 34 |                          |                     |                                                                      |       |
| 35 |                          |                     |                                                                      |       |

36 None The STROBE checklist is distributed under the terms of the Creative Commons Attribution  
37 License CC-BY. This checklist can be completed online using <https://www.goodreports.org/>, a tool  
38 made by the [EQUATOR Network](#) in collaboration with [Penelope.ai](#)  
39  
40  
41  
42  
43  
44  
45  
46  
47  
48  
49  
50  
51  
52  
53  
54  
55  
56  
57  
58  
59  
60



# BMJ Open

## Substance use disorders and adherence to anti-tuberculosis medications in Southwest Ethiopia: A prospective cohort study

|                                 |                                                                                                                                                                                                                                                                                                                                                                                                                                                                                                                                                                                                                                                                                                                                                                                                                                                                                                                                                                                                                                                                                                                                                                                                                                                                                                                                                                                   |
|---------------------------------|-----------------------------------------------------------------------------------------------------------------------------------------------------------------------------------------------------------------------------------------------------------------------------------------------------------------------------------------------------------------------------------------------------------------------------------------------------------------------------------------------------------------------------------------------------------------------------------------------------------------------------------------------------------------------------------------------------------------------------------------------------------------------------------------------------------------------------------------------------------------------------------------------------------------------------------------------------------------------------------------------------------------------------------------------------------------------------------------------------------------------------------------------------------------------------------------------------------------------------------------------------------------------------------------------------------------------------------------------------------------------------------|
| Journal:                        | <i>BMJ Open</i>                                                                                                                                                                                                                                                                                                                                                                                                                                                                                                                                                                                                                                                                                                                                                                                                                                                                                                                                                                                                                                                                                                                                                                                                                                                                                                                                                                   |
| Manuscript ID                   | bmjopen-2020-043050.R2                                                                                                                                                                                                                                                                                                                                                                                                                                                                                                                                                                                                                                                                                                                                                                                                                                                                                                                                                                                                                                                                                                                                                                                                                                                                                                                                                            |
| Article Type:                   | Original research                                                                                                                                                                                                                                                                                                                                                                                                                                                                                                                                                                                                                                                                                                                                                                                                                                                                                                                                                                                                                                                                                                                                                                                                                                                                                                                                                                 |
| Date Submitted by the Author:   | 31-Mar-2021                                                                                                                                                                                                                                                                                                                                                                                                                                                                                                                                                                                                                                                                                                                                                                                                                                                                                                                                                                                                                                                                                                                                                                                                                                                                                                                                                                       |
| Complete List of Authors:       | Daba, Matiwas; Jimma University College of Public Health and Medical Sciences, Psychiatry; Center for International Health, Ludwig Maxmillians University, Munich, Germany<br>Tsfaye, Markos ; Department of Psychiatry, St. Paul's Hospital Millennium Medical College, Addis Ababa, Ethiopia, Psychiatry; Center for International Health, Ludwig Maxmillians University, Munich, Germany<br>Adorjan, Kristina; Department of Psychiatry and Psychotherapy, LMU Munich, Germany; Institute of Psychiatric Phenomics and Genomics (IPPG), University Hospital, LMU Munich, Germany<br>Krahl, Wolfgang ; Department of Forensic Psychiatry, Isar Amper Klinikum, Munich, Germany, Forensic Psychiatry; Center for International Health, Ludwig Maxmillians University, Munich, Germany<br>Tsfaye, Elias ; Department of Psychiatry, Medical Faculty, Jimma University, Jimma Ethiopia, Psychiatry<br>Yitayih, Yimenu; Jimma University College of Public Health and Medical Sciences, Psychiatry<br>Strobl, Ralf; Ludwig-Maximilians-Universitat Munchen, Institute for Medical Information Processing, Biometrics and Epidemiology<br>Grill, Eva; Ludwig Maximilians University Munich, Institute for Medical Information Processing, Biometrics and Epidemiology, LMU Munich, Munich, Germany ; Center for International Health, Ludwig Maxmillians University, Munich, Germany |
| <b>Primary Subject Heading</b>: | Addiction                                                                                                                                                                                                                                                                                                                                                                                                                                                                                                                                                                                                                                                                                                                                                                                                                                                                                                                                                                                                                                                                                                                                                                                                                                                                                                                                                                         |
| Secondary Subject Heading:      | Addiction, Infectious diseases, Mental health                                                                                                                                                                                                                                                                                                                                                                                                                                                                                                                                                                                                                                                                                                                                                                                                                                                                                                                                                                                                                                                                                                                                                                                                                                                                                                                                     |
| Keywords:                       | Substance misuse < PSYCHIATRY, Tuberculosis < INFECTIOUS DISEASES, INFECTIOUS DISEASES, CLINICAL PHARMACOLOGY                                                                                                                                                                                                                                                                                                                                                                                                                                                                                                                                                                                                                                                                                                                                                                                                                                                                                                                                                                                                                                                                                                                                                                                                                                                                     |
|                                 |                                                                                                                                                                                                                                                                                                                                                                                                                                                                                                                                                                                                                                                                                                                                                                                                                                                                                                                                                                                                                                                                                                                                                                                                                                                                                                                                                                                   |

SCHOLARONE™  
Manuscripts



I, the Submitting Author has the right to grant and does grant on behalf of all authors of the Work (as defined in the below author licence), an exclusive licence and/or a non-exclusive licence for contributions from authors who are: i) UK Crown employees; ii) where BMJ has agreed a CC-BY licence shall apply, and/or iii) in accordance with the terms applicable for US Federal Government officers or employees acting as part of their official duties; on a worldwide, perpetual, irrevocable, royalty-free basis to BMJ Publishing Group Ltd ("BMJ") its licensees and where the relevant Journal is co-owned by BMJ to the co-owners of the Journal, to publish the Work in this journal and any other BMJ products and to exploit all rights, as set out in our [licence](#).

The Submitting Author accepts and understands that any supply made under these terms is made by BMJ to the Submitting Author unless you are acting as an employee on behalf of your employer or a postgraduate student of an affiliated institution which is paying any applicable article publishing charge ("APC") for Open Access articles. Where the Submitting Author wishes to make the Work available on an Open Access basis (and intends to pay the relevant APC), the terms of reuse of such Open Access shall be governed by a Creative Commons licence – details of these licences and which [Creative Commons](#) licence will apply to this Work are set out in our licence referred to above.

Other than as permitted in any relevant BMJ Author's Self Archiving Policies, I confirm this Work has not been accepted for publication elsewhere, is not being considered for publication elsewhere and does not duplicate material already published. I confirm all authors consent to publication of this Work and authorise the granting of this licence.

1  
2  
3  
4  
5 **Substance use disorders and adherence to anti-tuberculosis medications in Southwest**  
6  
7 **Ethiopia: A prospective cohort study**  
8

9  
10 Matiws Soboka<sup>1\*,8</sup>, Markos Tesfaye<sup>2,8</sup>, Kristina Adorjan<sup>3,4,8</sup>, Wolfgang Krahl<sup>5,8</sup>, Elias  
11  
12 Tesfaye<sup>1</sup>, Yimenu Yitayih<sup>1</sup>, Ralf Strobl<sup>6</sup>, Eva Grill<sup>6,8</sup>  
13  
14  
15  
16  
17  
18  
19  
20

21 **\* Corresponding author:** Matiws Soboka, Department of Psychiatry, Medical Faculty, Jimma University, Jimma  
22  
23 Ethiopia, Center for International Health, Ludwig Maxmillians University, Munich, Germany  
24

25  
26 **Email:** [matiws2004@yahoo.com](mailto:matiws2004@yahoo.com)  
27

28  
29 **Phone:** +251913792348  
30

31 <sup>1</sup> Department of Psychiatry, Medical Faculty, Jimma University, Jimma Ethiopia.  
32

33  
34 <sup>2</sup> Department of Psychiatry, St. Paul's Hospital Millennium Medical College, Addis Ababa, Ethiopia  
35

36  
37 <sup>3</sup> Department of Psychiatry and Psychotherapy, LMU Munich, Germany  
38

39  
40 <sup>4</sup> Institute of Psychiatric Phenomics and Genomics (IPPG), University Hospital, LMU Munich, Germany  
41

42  
43 <sup>5</sup>Department of Forensic Psychiatry, Isar Amper Klinikum, Munich, Germany  
44

45  
46 <sup>6</sup> Institute for Medical Information Processing, Biometrics and Epidemiology, LMU Munich, Munich, Germany  
47

48  
49 <sup>7</sup> Institute for Medical Information Processing, Biometrics and Epidemiology, LMU Munich, Munich, Germany  
50

51  
52 <sup>8</sup>Center for International Health, Ludwig Maxmillians University, Munich, Germany  
53  
54  
55  
56  
57

## Abstract

**Objectives:** In Ethiopia, little is known about the association between substance use disorders and adherence to anti-TB medications. Therefore, the objective of this study was to assess the effect of substance use disorders on adherence to anti-TB medications in Southwest Ethiopia.

**Design:** Prospective cohort study.

**Settings:** Patients were recruited from 22 health centers and four hospitals in Southwest Ethiopia.

**Participants:** This study was conducted among 268 patients with tuberculosis, aged 18-80 in Southwest Ethiopia between October 2017 and October 2018. At baseline, patients who were exposed substance use disorders (134 patients) and unexposed to substance use disorders (134 patients) were recruited. Patients were followed for six months, and data were collected on three occasions.

**Main outcome measure:** Adherence to anti-TB medications.

**Results:** Patients with substance use disorders had consistently higher prevalence of non-adherence than those without, 16.4% vs. 3.0% at baseline, 41.7% vs 14.4% at two month follow up, and 45.7% vs 10.8% at six month follow up assessments. Patients with khat use disorder were 3.8 times more likely to be non-adherent to anti-TB medications than patients without khat use disorder (aOR 3.8, 95%CI=1.8-8.0). Patients who had alcohol use disorder were also 3.2 times likely to have poor adherence compared to their counterparts (aOR=3.2, 95%CI=1.6-6.6). In addition, being educated (aOR =4.4, 95%CI=1.7-11.3), and being merchant (aOR=6.1, 95%CI=1.2-3.0) were associated with non-adherence to anti-TB medications.

1  
2  
3 **Conclusion:** Khat and alcohol use disorders predict greater likelihood of non-adherence to anti-  
4 TB medication. This implies the need to integrate the management for substance use disorders  
5 into the existing tuberculosis treatment services.  
6  
7  
8  
9

10  
11 **Keywords:** Substance use disorders, alcohol, khat, anti-TB adherence, non-adherence, Ethiopia.  
12  
13

### 14 **Strengths and limitations**

- 15  
16  
17 ➤ The strengths of this study are the prospective cohort design, longitudinal data collection,  
18 including patients from urban and rural health institutions, intensive training for data  
19 collectors, multi-center data collection, and use of standardized instruments.  
20  
21  
22  
23  
24  
25 ➤ Due to social desirability, patients might minimize reporting of the amount and frequency  
26 of the substances they were using.  
27  
28  
29  
30  
31 ➤ Measuring adherence based on pills count may not reflect the real adherence situation,  
32 since patients may not bring all leftover medications during the follow up.  
33  
34  
35  
36 ➤ Follow up and data collections have been carried out by health professionals working in  
37 the respective TB clinic. As a result, their assessment of adherence might be biased.  
38  
39  
40  
41 ➤ Hospitalized patients, patients on re-treatment, and patients with MDR-TB were not  
42 included in this study, and this may limit the generalizability of the result for these  
43 patients.  
44  
45  
46  
47  
48  
49  
50  
51  
52  
53  
54  
55  
56  
57  
58  
59  
60

## Introduction

Tuberculosis (TB) is a preventable and treatable disease but it remains one of the major diseases leading to death worldwide (1, 2). World Health Organization (WHO) estimates that 1.6 million persons died of TB in 2017 (1); almost 20% of them were HIV positive (1). The number of TB patients is estimated at about 10 million with an annual incidence of 6.4%. TB remains the main reason for premature mortality among HIV positive patients (1).

TB is most prevalent in middle and low-income countries. This exerts enormous pressure on societies as TB mainly affects mostly adults in the economically productive age groups (1, 3, 4). In fact, 87% of cases worldwide are from Asia, Africa, and the Russian Federation (1, 5). Tuberculosis related morbidity and mortality also remain high in low and middle-income countries. Because these countries have poor nutrition, unfavorable housing conditions, and unstable health care (1). Notably, 117,705 new cases were registered in 2017 in Ethiopia, corresponding to an annual incidence of 164 per 100,000 inhabitants (1). Ethiopia remains one of the top 22 countries having the highest TB mortality with an estimated mortality rate of 24 per 100,000 inhabitants in 2017 (1).

Long-term adherence to standardized medication is the key to successful treatment of TB as non-adherence may lead to the emergence of multidrug-resistant TB (MDR-TB), an increasing global health threat (1, 6, 7). Non-adherence to anti-TB medication could also lead to a lower treatment success rate (8, 9), default, and death (10, 11). Thus, Ethiopia has developed a national TB treatment guideline to ensure adherence through regular appointments and supervised drug administration, and to reduce poor treatment outcomes (12).

1  
2  
3 In Ethiopia, the prevalence of non-adherence among TB patients has been estimated to range  
4 from 10% in Amhara region to 24% in Southern Nations and Nationalities of Ethiopia (13). To  
5  
6 counteract this, the Ethiopian has implemented Direct Observed Treatment (DOT) services in  
7  
8 almost all health institutions (12), but its impact on medication adherence is unclear and the  
9  
10 reasons for non-adherence are still poorly understood.  
11  
12  
13

14  
15 Among the reasons for non-adherence, substance use disorders have been found to play a  
16  
17 dominant role (8, 14-16). Substances such as alcohol, tobacco, khat, and illicit drugs are  
18  
19 commonly used among patients with TB (17-19). Patients with TB are also at risk of increased  
20  
21 morbidity, and premature mortality due to substance use disorders (20). Because, substance use  
22  
23 disorders such as alcohol and tobacco are associated with MDR-TB (21, 22).  
24  
25  
26

27  
28 Khat is a natural stimulant with over 40 active compounds. Among these, psychoactive alkaloids,  
29  
30 cathinone, and cathine cause the stimulating effect, and lead to craving and dependency (23-26).  
31  
32 There is evidence that khat use increases susceptibility to tuberculosis (27-31), and maybe  
33  
34 associated with poor TB treatment outcomes (14, 32), prolonged duration of treatment (33), and  
35  
36 high load of bacteria in TB patients (34). In Yemen, khat use has been shown to be associated  
37  
38 with non-adherence to anti-tuberculosis medications (35), probably because khat disrupts  
39  
40 patients' sleep patterns and causes them to miss their appointments (35, 36). Ethiopia, like  
41  
42 Yemen, counts among the few countries where khat use is legal. Khat use disorder may be an  
43  
44 important but unrecognized threat to anti-TB medication adherence. Filling the information gaps  
45  
46 about the effect of substance use disorders will help to improve TB treatment outcomes and  
47  
48 inform decision makers about the need for an integration of substance use disorder treatment in  
49  
50 TB control programs in the future. Therefore, the objective of this study is to assess the effect of  
51  
52 substance use disorders (including khat and alcohol) on adherence to anti-TB medications in  
53  
54  
55  
56  
57

1  
2  
3 Southwest Ethiopia. Specifically, we examined the association of the most frequently used  
4 substances, namely khat and/or alcohol, on adherence to guideline compatible TB treatment.  
5  
6  
7

## 8 **Methods**

### 9 **Study area, period, and patients**

10  
11  
12 We conducted a prospective cohort study in Jimma zone and Jimma city special zone. Jimma  
13 city special zone is the capital city of Jimma zone and located in the Southwestern part of  
14 Ethiopia, 352 km from Addis Ababa, the capital of the country. The city has a tertiary hospital  
15 and a zonal hospital, as well as four functional health centers those currently providing services.  
16  
17 Similarly, Jimma Zone has 18 districts and located in the Southwest of Ethiopia. Overall, the  
18 zone has more than three million inhabitants. During the period of this study, Jimma Zone had  
19 112 health centers and three hospitals. Out of these government's public health facilities, 91  
20 health centers and all hospitals were providing services to TB patients. In this study, data was  
21 collected from a total of 26 health institutions (22 health centers and four hospitals). From Jimma  
22 city, we randomly selected 2 health centers and one hospital. We also randomly selected 20  
23 health centers and three hospitals from the Jimma Zone. Patients were included if they had  
24 initiated anti-TB treatment within a month of start of the study at the selected health centers and  
25 hospitals between October 2017 and October 2018. Patients were recruited over the first six  
26 months.  
27  
28  
29  
30  
31  
32  
33  
34  
35  
36  
37  
38  
39  
40  
41  
42  
43  
44  
45  
46  
47

### 48 **Study design**

49  
50  
51 This study is a multicenter prospective cohort study. Patients recruited to the cohort were  
52 interviewed on three occasions, namely, baseline (starting treatment), first follow up (after 2  
53 months), and second follow up (at the end of six months).  
54  
55  
56  
57



### Sample size assumption and sampling procedure

The prevalence of non-adherence among TB patients who also used khat from previous studies was 62.4% (35). The prevalence of non-adherence among non khat user TB patients was 43.6% (35). We have included 111 exposed (with substance use) and 111 unexposed (without substance use) individuals to detect a difference of non-adherence to anti-TB medication at an alpha level of 0.05 and with a power of 80% using the corrected Fleiss sample size calculation [EPInfo™] (37). The total sample size was calculated considering a 20% of drop out rate and the final sample size was 134 in each group which totals 268 TB patients. New TB patients who were 18 years or older were recruited to participate in the study. Patients who had been on treatment for more than one month, patients on re-treatment, and MDR-TB cases were not included in the study.

### Instruments

#### Exposure variables

In this study, the exposure variable is substance use disorder which includes khat and/or alcohol use disorder.

*Substance use disorder:* In this study substance use disorder was defined as having khat and/or alcohol use disorder. Data on tobacco, shisha, and cannabis use were collected for explorative data analysis.

*Alcohol use disorders (AUDs):*-Alcohol use disorder identification test (AUDIT) was used to collect data on AUDs (38). The AUDIT was evaluated over a period of two decades, and provides an accurate measure of risk of AUDs across gender, age, and cultures. With a cut-off

1  
2  
3 score of eight or more, the sensitivity, and specificity of AUDIT for AUDs was 0·90 and 0·80,  
4  
5 respectively (39). AUDIT was used in Ethiopian context and questions number two and three  
6  
7 regarding standard drinks were adapted to a more locally appropriate question (40).  
8  
9

10  
11 *Nicotine dependence:* The Fagerstrom test for nicotine dependence (FTND) was used to assess  
12  
13 tobacco dependence. A total score of FTND  $\geq 5$  was considered as tobacco dependence (41). At  
14  
15 a cut-off score  $\geq 5$ , the FTND has good sensitivity (0·75), and specificity (0·80). The FTND has  
16  
17 six items, with a total score ranging from 0-10 to measure nicotine dependence. A total FTND  
18  
19 score of five indicates moderate nicotine dependence, a score of 6-7 indicates high nicotine  
20  
21 dependence, and a score of 8-10 indicates very high nicotine dependence. Patients were also  
22  
23 asked about their reasons for smoking tobacco (41).  
24  
25  
26  
27

28 *Cannabis and shisha use:* Use of both substances and their frequency were assessed.  
29  
30

31 *Khat use:* - Khat use was assessed by self-reported questionnaire. Since there is no standardized  
32  
33 questionnaire for khat use, patterns, and reasons of khat use were assessed by using a structured  
34  
35 questionnaire which was developed in the context of a literature review. Any consumption of  
36  
37 khat in the last one month was considered as current khat use. Frequent khat use (using khat  
38  
39 daily and 2-3 times per week) and using more than one bundle of khat per day was considered as  
40  
41 khat use disorder.  
42  
43  
44

## 45 **Outcome variable**

46  
47

48 *Adherence:* Adherence status of tuberculosis patients was assessed by Direct Observed  
49  
50 Treatment (DOT) (based on missing appointments) and pills counts. In this study, adherence is  
51  
52 defined as taking medication regularly and attending follow-up according to appointments and  
53  
54 national guideline for tuberculosis in Ethiopia (12). In this study, non-adherence is defined as  
55  
56  
57

1  
2  
3 missing at least one follow-up appointment during DOT. Non-adherence during intensive phase  
4  
5 is defined as missing at least one dose of the prescribed anti-TB medication and noted separately.  
6  
7 Adherence was assessed at baseline (beginning of intensive phase), at second month (end of  
8  
9 intensive phase), and at end of 6 month (end of continuation phase).  
10  
11  
12

### 13 **Explanatory variables**

14  
15  
16 *Socio-demographic variables:* Age, sex, marital status, level of education, religion, ethnicity,  
17  
18 income, household size, occupation, place of residence, and living conditions were assessed  
19  
20 using a structured questionnaire. Income was categorized considering that the minimum monthly  
21  
22 wage for employees of governmental organization in Ethiopia of 1,214 Ethiopian birr (36·67  
23  
24 Euros) (42). Then the monthly income of each patient was multiplied by 12 months to obtain the  
25  
26 annual income, and we used a cutoff 14,568 Ethiopian birr (439·98 Euros).  
27  
28  
29

30  
31 *Disease related factors:* Types of TB diagnosis (smear positive, smear negative, extrapulmonary  
32  
33 TB, and MDR-TB) were collected from patients' charts.  
34  
35

36  
37 *Comorbidities:* All confirmed diagnoses of HIV, previous mental illness, hypertension, and  
38  
39 diabetes mellitus were collected from patients' charts.  
40  
41

42 *Social support:* Oslo Social Support Scale (The Oslo 3-items) was used to collect data on the  
43  
44 strength of social support. The Oslo-3 total score 3-8 indicate poor social support, 9-11 indicate  
45  
46 moderate social support, and 12-14 indicate strong social support (43). The scale had been  
47  
48 validated in Ethiopia among patients with tuberculosis (44). Social support was assessed at  
49  
50 baseline, second month (at first follow up), and six month (at the completion of anti-TB  
51  
52 treatment or second follow up).  
53  
54  
55  
56  
57

1  
2  
3 *Food insecurity*: It was assessed using the Household Food Insecurity Access Scale (HFIAS) to  
4 determine whether the respondent has experienced any of the indicators of food insecurity in the  
5 previous month. Food secure if none of the items were endorsed on HFIAS, mild food insecurity  
6 if the respondent endorsed any of the items 1, 2, 3, and/or 4 but not the items 5 to 9, 'moderate  
7 food insecurity' if the respondent has endorsed items 5, and/or 6 but not the items 7 to 9, and  
8 'severe food insecurity' if the respondent has endorsed items 7, 8, and/or 9 (45). This tool had  
9 been validated in Ethiopia among people living with HIV (46, 47). Food insecurity assessed at  
10 baseline, second month (at first follow up), and six month (at the completion of anti-TB  
11 treatment or second follow up).  
12  
13  
14  
15  
16  
17  
18  
19  
20  
21  
22  
23  
24

### 25 **Data collection procedures**

26  
27  
28 Before starting data collection, the questionnaires were pretested on a sample (5% of the total  
29 sample) of patients with TB who were on treatment at Agaro health center. Those patients who  
30 participated in the pretest were not included in the main cohort study. Data were collected by  
31 trained health professionals working in the respective TB clinics. Also, district tuberculosis focal  
32 persons and other health professionals specifically trained for this purpose participated in the  
33 supervision of data collection.  
34  
35  
36  
37  
38  
39  
40  
41

### 42 **Data analysis**

43  
44  
45 Data were entered to Epi Data (version 3.1) and analyzed using R studio (1.2.1335). Missing  
46 values of income were excluded from the analysis. Participants' characteristics and study  
47 variables were presented using descriptive statistics. Generalized linear model was used to  
48 examine the longitudinal effect of substance use disorders on medication adherence (binary  
49 outcome). We used an intercept only model to investigate the trajectory of adherence over time  
50  
51  
52  
53  
54  
55  
56  
57

1  
2  
3 (model 0). Model 1 investigated the longitudinal effect of presence or absence of khat and  
4 alcohol use disorders on adherence without adjusting for covariates, model 2 investigated the  
5 longitudinal effect of khat and alcohol on adherence while adjusting for the full set of covariates.  
6  
7  
8  
9  
10 Model fit was examined with the Bayesian Information Criterion (BIC).

11  
12  
13 The covariate selection was based on a directed acyclic graph (DAG). DAGs are analytical  
14 method for visualizing hypotheses about causal relationships between exposure (substance use)  
15 and outcome (adherence) (48, 49). This approach has been shown to yield valid adjustment sets  
16 of variables and to avoid bias (50).  
17  
18  
19  
20  
21  
22

### 23 **Ethical considerations**

24  
25  
26 Ethical clearance was obtained from the Ethical Review Board of Jimma University  
27 (IHRPGC1095/2017) and LMU (Nr: 18-017). The study was discussed in detail and written  
28 informed consent was obtained from each participant. The anonymity of the study participants  
29 was kept at all stages of data processing and write-up of the manuscript. Patients who had  
30 alcohol and khat use disorder were advised to contact a mental health professional for further  
31 evaluation and treatment.  
32  
33  
34  
35  
36  
37  
38  
39  
40  
41

### 42 **Patient and public involvement**

43  
44  
45 Patients were not involved in development of the research questions, study design, interpretation  
46 of results or writing of the manuscript.  
47  
48  
49  
50  
51  
52  
53  
54  
55  
56  
57

## Results

### Socio-demographic characteristics

A total of 268 newly diagnosed patients (50% with substance use disorders, mean age 32.4, SD 14.4, 60.1% male) with tuberculosis were recruited. Of all patients, 10.8% (n=29), and 39.2% (n= 105) had alcohol and khat use disorders, respectively. No participant had tobacco, shisha, or cannabis use disorders. Age range was 18-80 years with 35% under 25 years (Refer to table 1). There were 22 missing data of annual income which we excluded from the analysis.

**Table1: Socio-demographic characteristics and substance use disorder among a cohort of patients on anti-tuberculosis treatment in Southwest Ethiopia, 2017/18 (n=268).**

| Variables  |                     | Total (%) | Substance use disorder |                          |                                    |
|------------|---------------------|-----------|------------------------|--------------------------|------------------------------------|
|            |                     |           | Baseline<br>N (%)      | First follow-up<br>N (%) | 2 <sup>nd</sup> follow up<br>N (%) |
| Gender     | Female              | 39.9      | 40(37.4)               | 35(32.7)                 | 45(42.1)                           |
|            | Male                | 60.1      | 94(58.4)               | 80(49.7)                 | 84(52.2)                           |
| Age        | 18-24               | 34.7      | 42(45.2)               | 31(33.3)                 | 38(40.9)                           |
|            | 25-34               | 32.5      | 35(40.2)               | 34(39.1)                 | 35(40.2)                           |
|            | 35-44               | 13.4      | 23(63.9)               | 20(55.6)                 | 22(61.1)                           |
|            | 45-54               | 10.1      | 17(63.0)               | 16(59.3)                 | 18(66.7)                           |
|            | 55-64               | 9.3       | 17(68.0)               | 14(56.0)                 | 16(64.0)                           |
| Occupation | Merchant            | 10.8      | 23(79.3)               | 19(65.5)                 | 20(69.0)                           |
|            | Farmer              | 34.3      | 57(62.0)               | 51(55.4)                 | 57(62.0)                           |
|            | Government employee | 39.2      | 37(35.2)               | 29(27.6)                 | 33(31.4)                           |
|            | Daily laborer       | 15.7      | 17(40.5)               | 16(38.1)                 | 19(45.2)                           |

|                       |                     |      |           |          |           |
|-----------------------|---------------------|------|-----------|----------|-----------|
| Education             | No formal education | 63·1 | 68(40·2)  | 59(34·9) | 62(36·7)  |
|                       | Literate            | 36·9 | 66(66·7)  | 56(56·6) | 67(67·7)  |
| Annual income in Birr | <14568              | 76·9 | 108(52·4) | 92(44·7) | 104(50·5) |
|                       | ≥14568              | 14·9 | 16(40·0)  | 17(42·5) | 18(45·0)  |
| Marital               | Single              | 36·2 | 85(54·1)  | 76(48·4) | 87(55·4)  |
|                       | Married             | 58·6 | 39(40·2)  | 32(33·0) | 34(35·1)  |
|                       | Divorced/widowed    | 5·2  | 10(71·4)  | 7(50·0)  | 8(57·1)   |
| Religion              | Orthodox            | 30·6 | 43(52·4)  | 27(32·9) | 43(52·4)  |
|                       | Muslim              | 61·6 | 89(53·9)  | 86(52·1) | 82(49·7)  |
|                       | Protestant/others   | 7·8  | 2(9·5)    | 2(9·5)   | 4(19·0)   |
| Ethnicity             | Amhara              | 22·0 | 27(45·8)  | 17(28·8) | 29(49·2)  |
|                       | Oromo               | 61·6 | 83(50·3)  | 82(49·7) | 79(47·9)  |
|                       | Tigre/Gurage        | 16·4 | 24(54·5)  | 16(36·4) | 21(47·7)  |
| Family size           | Less than five      | 67·5 | 89(49·2)  | 76(42·0) | 89(49·2)  |
|                       | Five or greater     | 32·5 | 45(51·7)  | 39(44·8) | 40(46·0)  |
| Residence             | Rural               | 47·4 | 72(56·7)  | 59(46·5) | 68(53·5)  |
|                       | Urban               | 52·6 | 62(44·0)  | 56(39·7) | 61(43·3)  |
| Type of tuberculosis  | Smear positive,     | 40·3 | 54(50·0)  | 43(39·8) | 46(42·6)  |
|                       | Smear negative      | 32·5 | 43(49·4)  | 39(44·8) | 46(52·9)  |
|                       | Extra pulmonary     | 27·2 | 37(50·7)  | 33(45·2) | 37(50·7)  |

### Clinical characteristics and non-adherence

Out of all patients, 40.3 % (n=108), 32.5 % (n=87), and 27.2 % (n=73) were diagnosed with smear positive, smear negative, and extra pulmonary TB respectively. At baseline, 3.7% (n=10) patients were diagnosed with HIV, and 7.1% (n=19) with other comorbidities. At baseline 9.7 % (n=26) were non-adherent to TB medication. At two and six months of assessment, 26.1% (n=70) and 27.6% (n=74) missed at least one dose of their medications respectively. .

The prevalence of non-adherence among patients with substance use disorder was 16.4% (n=22), 41.7 % (n=48), and 45.7% (n=59) at baseline, first, and second follow up respectively (See table 2).

**Table 2: Various characteristics by adherence to anti-TB medications at the three time point assessments among patients with tuberculosis in Southwest Ethiopia 2017/18 (n=268)**

| Variables              |        | Adherence to anti-TB at baseline |                       | Adherence to anti-TB at first follow-up |                       | Adherence to anti-TB at second follow-up |                       |
|------------------------|--------|----------------------------------|-----------------------|-----------------------------------------|-----------------------|------------------------------------------|-----------------------|
|                        |        | Adherent<br>N (%)                | Non-adherent<br>N (%) | Adherent<br>N (%)                       | Non-adherent<br>N (%) | Adherent<br>N (%)                        | Non-adherent<br>N (%) |
| Substance use disorder | No     | 130(97.0)                        | 4(3.0)                | 131(85.6)                               | 22(14.4)              | 124(89.2)                                | 15(10.8)              |
|                        | Yes    | 112(83.6)                        | 22(16.4)              | 67(58.3)                                | 48(41.7)              | 70(54.3)                                 | 59(45.7)              |
| Gender                 | Male   | 143(88.8)                        | 18(11.2)              | 112(69.6)                               | 49(30.4)              | 83(77.6)                                 | 24(22.4)              |
|                        | Female | 99(92.5)                         | 8(7.5)                | 86(80.4)                                | 21(19.6)              | 111(68.9)                                | 50(31.1)              |
| Age                    | 18-24  | 88(94.6)                         | 5(5.4)                | 72(77.3)                                | 21(22.7)              | 69(74.2)                                 | 24(25.8)              |
|                        | 25-34  | 79(90.8)                         | 8(9.2)                | 64(73.7)                                | 23(26.3)              | 67(77.0)                                 | 20(23.0)              |
|                        | 35-44  | 28(77.8)                         | 8(22.2)               | 24(66.7)                                | 12(33.3)              | 23(63.9)                                 | 13(36.1)              |



|                       |                       |           |          |           |          |           |          |
|-----------------------|-----------------------|-----------|----------|-----------|----------|-----------|----------|
|                       | 45-54                 | 24(88.9)  | 3(11.1)  | 21(77.8)  | 6(22.2)  | 19(70.4)  | 8(29.6)  |
|                       | 55-64                 | 23(92.0)  | 2(8.0)   | 17(68.0)  | 8(32.0)  | 16(64.0)  | 9(36.0)  |
| Occupation            | Merchant              | 22(75.9)  | 7(24.1)  | 17(58.6)  | 12(41.4) | 14(48.3)  | 15(51.7) |
|                       | Farmer                | 79(85.9)  | 23(14.1) | 66(71.7)  | 26(28.3) | 64(69.6)  | 28(30.4) |
|                       | Government Employee   | 21(95.5)  | 1(4.5)   | 79(75.2)  | 26(24.8) | 82(78.1)  | 23(21.9) |
|                       | Daily laborer         | 41(97.6)  | 1(2.4)   | 36(85.0)  | 6(14.3)  | 34(81.0)  | 8(19.0)  |
| Education             | No formal education   | 165(97.6) | 4(2.4)   | 145(85.8) | 24(14.2) | 139(82.2) | 30(17.8) |
|                       | Literate              | 77(77.8)  | 22(22.2) | 53(53.5)  | 46(46.5) | 55(55.6)  | 44(44.4) |
|                       | Tertiary              | 20(71.4)  | 8(28.6)  | 8(28.6)   | 20(71.4) | 10(35.7)  | 18(64.3) |
| Annual income in Birr | <14568                | 185(89.8) | 21(10.2) | 154(74.8) | 52(25.2) | 149(72.3) | 57(27.7) |
|                       | ≥14568                | 37(92.5)  | 3(7.5)   | 30(75.0)  | 10(25.0) | 31(77.5)  | 9(22.5)  |
| Food insecurity       | No                    | 129(94.9) | 7(5.1)   | 105(72.4) | 40(27.6) | 118(72.8) | 44(27.2) |
|                       | Middle/moderate       | 46(80.7)  | 11(19.3) | 29(70.0)  | 12(29.3) | 26(60.5)  | 17(39.5) |
|                       | Severe                | 67(89.3)  | 8(10.7)  | 64(78.0)  | 18(22.0) | 50(79.4)  | 13(20.6) |
| Marital status        | Single                | 92(94.8)  | 5(5.2)   | 109(69.4) | 48(30.6) | 80(82.5)  | 17(17.5) |
|                       | Married               | 140(89.2) | 17(10.8) | 80(85.8)  | 17(17.2) | 104(66.2) | 53(33.8) |
|                       | Divorced/widowed      | 10(71.4)  | 4(28.6)  | 9(64.6)   | 5(37.4)  | 10(71.4)  | 4(28.6)  |
| Religion              | Orthodox              | 74(90.2)  | 8(9.8)   | 63(76.8)  | 19(23.2) | 61(74.4)  | 21(25.6) |
|                       | Muslim                | 147(89.7) | 18(10.3) | 118(71.5) | 47(28.5) | 114(69.1) | 51(39.9) |
|                       | Protestant and others | 20(95.2)  | 1(4.8)   | 17(81.0)  | 4(19.0)  | 19(90.5)  | 2(9.5)   |
| Ethnicity             | Amhara                | 53(89.8)  | 6(10.2)  | 49(83.1)  | 10(16.9) | 48(81.4)  | 11(18.6) |

|                |                 |           |          |           |          |           |          |
|----------------|-----------------|-----------|----------|-----------|----------|-----------|----------|
|                | Oromo           | 160(90.9) | 16(9.1)  | 119(72.1) | 46(27.9) | 119(72.1) | 46(27.9) |
|                | Tigre/Gurage    | 29(87.9)  | 4(12.1)  | 30(68.2)  | 14(31.8) | 27(61.4)  | 17(38.6) |
| Family size    | Less than five  | 165(91.2) | 16(8.8)  | 132(72.9) | 49(27.1) | 137(75.7) | 44(24.3) |
|                | Five or greater | 77(88.5)  | 10(11.5) | 66(75.9)  | 21(24.1) | 57(64.5)  | 30(34.5) |
| Residence      | Rural           | 113(89.0) | 14(11.0) | 94(74.0)  | 33(26.0) | 93(73.2)  | 34(26.8) |
|                | Urban           | 129(91.5) | 12(8.5)  | 104(73.0) | 37(26.2) | 101(71.6) | 40(28.4) |
| Type of TB     | Smear positive  | 95(91.9)  | 13(8.1)  | 80(74.1)  | 28(25.9) | 78(72.2)  | 30(27.8) |
|                | Smear negative  | 81(9.1)   | 6(6.9)   | 66(75.9)  | 21(24.1) | 64(73.6)  | 23(26.4) |
|                | Extra pulmonary | 66(90.4)  | 7(9.6)   | 52(71.2)  | 21(28.8) | 52(71.2)  | 21(28.8) |
| HIV            | Seronegative    | 233(90.3) | 25(9.7)  | 190(74.2) | 66(25.8) | 183(73.5) | 66(26.5) |
|                | Seropositive    | 9(90.0)   | 1(10.0)  | 8(66.7)   | 4(33.3)  | 11(57.9)  | 8(42.1)  |
| Social support | Poor            | 83(89.2)  | 10(10.8) | 83(74.8)  | 28(25.2) | 96(68.6)  | 44(34.1) |
|                | Moderate        | 101(89.4) | 12(10.6) | 68(80.0)  | 17(20.0) | 58(78.4)  | 16(21.6) |
|                | Good            | 58(93.5)  | 4(6.5)   | 47(65.3)  | 25(34.7) | 40(74.1)  | 14(25.9) |

### Effect of substance use disorder on the adherence to anti-TB medications

The intercept only model (model 0) showed a significant decrease in the percentage of adherence over time (BIC= 642.5). Adding alcohol and khat use disorders (model 1) improved model fit (BIC=627.6): Patients with khat use disorder had a significantly higher probability of non-adherence over time (OR= 4.2, 95%CI=2.1-8.6). The odds of non-adherence among patients with alcohol use disorder (AUDs) was 3.3 times that of patients free of AUDs (OR=3.3, 95%CI=1.6-6.6). Adding covariates did not substantially change this association (OR= 2.8, 95%CI=2.0-3.8) and further improved model fit (BIC= 642.2). In the final model, khat use disorder (aOR= 3.8,

95%CI=1.8-8.0), or alcohol use disorder (aOR= 3.2, 95%CI=1.6-6.6), being educated (aOR=4.4, 95%CI=1.7-11.3), and being merchant (aOR=6.1, 95%CI= 1.2-30.8) were associated with decreasing adherence (See table 3). Patients with khat use disorder were 3.8 times more likely to be non-adherent to anti-TB medications than patients without khat use disorder. Also, participants whose occupation was merchant were 6.1 times more likely to be non-adherent to anti-TB medications compared to daily laborers.

**Table 3: Predictors of non-adherence to anti TB medications among patients with tuberculosis in Southwest Ethiopia 2017/2018 (n=268).**

| Variables      |                         | Model 0(Intercept only) |       | Model 1(khat and alcohol including age and gender) |         | Full model |          |
|----------------|-------------------------|-------------------------|-------|----------------------------------------------------|---------|------------|----------|
|                |                         | OR                      | 95%CI | OR                                                 | 95%CI   | aOR        | 95%CI    |
| Khat UD        | No                      | Reference               |       |                                                    |         |            |          |
|                | Yes                     | -                       | -     | 4.2                                                | 2.1-8.6 | 3.8        | 1.8-8.0  |
| AUDs           | No                      | Reference               |       |                                                    |         |            |          |
|                | Yes                     | -                       | -     | 3.3                                                | 1.6-6.6 | 3.2        | 1.6-6.6  |
| Age            | 18-24                   | Reference               |       |                                                    |         |            |          |
|                | 25-34                   | -                       | -     | 1.2                                                | 0.4-3.2 | -          | -        |
|                | 35-44                   | -                       | -     | 1.8                                                | 0.5-6.4 | -          | -        |
|                | 45-54                   | -                       | -     | 0.9                                                | 0.2-4.0 | -          | -        |
|                | ≥55                     | -                       | -     | 1.2                                                | 0.3-5.1 | -          | -        |
| Gender         | Female                  | Reference               |       |                                                    |         |            |          |
|                | Male                    | -                       | -     | 1.6                                                | 0.7-3.6 | -          | -        |
| Education      | No formal education     | Reference               |       |                                                    |         |            |          |
|                | Read and write/literate | -                       | -     | -                                                  | -       | 4.4        | 1.7-11.3 |
| Social support | Good                    | Reference               |       |                                                    |         |            |          |
|                | moderate                | -                       | -     | -                                                  | -       | 0.5        | 0.2-1.2  |
|                | Poor                    | -                       | -     | -                                                  | -       | 0.8        | 0.3-1.9  |

|            |                     |           |         |       |         |       |          |
|------------|---------------------|-----------|---------|-------|---------|-------|----------|
| Occupation | Daily laborer       | Reference |         |       |         |       |          |
|            | Farmer              | -         | -       | -     | -       | 2·1   | 0·5-8·0  |
|            | Government employee | -         | -       | -     | -       | 2·1   | 0·6-8·0  |
|            | Merchant            | -         | -       | -     | -       | 6·1   | 1·2-30·8 |
| Time T2    |                     | 2·7       | 2·0-3·6 | 2·7   | 2·0-3·6 | 2·8   | 2·0-3·8  |
| BIC        |                     | 642·5     |         | 672·6 |         | 642·2 |          |

## Discussion

This study conducted in patients undergoing standardized treatment for tuberculosis in Southwest Ethiopia revealed three important findings: 1) adherence to medication decreased over the course of treatment; 2) substance use disorders, particularly khat and alcohol contributed to this non-adherence; and 3) this association was independent of other factors such as education, social support, and occupation.

It is alarming that adherence to TB medication decreased over the course of treatment, as already shown by studies done in South Ethiopia (51), Northwest Ethiopia (52), and Addis Ababa (53) Ethiopia. Possible reasons for non-compliance are distance from the health institution that dispenses medications (13, 51), lack of knowledge about tuberculosis (51, 52), psychological distress (53), being busy with work (52), and alcohol intake (52). To solve the problem related to adherence, Ethiopian health authorities have reinforced their efforts to implement DOT programs throughout the whole treatment and all over the country starting from initiation to completion of treatment (12).

In this study, the prevalence of non-adherence to anti-TB medication in the first month of treatment was 9·7 % which is in line with a systematic review that found 10·0% of non-

1  
2  
3 adherence in the Amhara region (13, 54). The proportion of non-adherence to anti-TB  
4 medications during the first (26.1%) and second (27.6%) follow up was slightly higher than  
5 findings from South Ethiopia (24.5%) (51), Northwest Ethiopia (21.2%) (52), and Addis Ababa  
6 (19.5%) (53). This might be explained by the high proportion of persons with a substance use  
7 disorder in our study, in which we deliberately oversampled persons with SUD to maximize  
8 power. The discrepancy may be also due to patients in our study were using substances whereas  
9 in the systematic review there was no data regarding substance use.  
10  
11  
12  
13  
14  
15  
16  
17  
18  
19

20 In this study, the prevalence of non-adherence among patients with substance use disorder at  
21 baseline, first, and second follow up was 16.4%, 41.7%, and 45.7% respectively. This is in line  
22 with a study from the US (39%) (52, 55, 56).  
23  
24  
25  
26  
27

28 Moreover, this study provides the evidence that substance use disorders have a significant  
29 negative effect on adherence to anti-TB medications among patients with tuberculosis, which  
30 supports earlier findings from previous studies that found alcohol use disorder, tobacco  
31 dependence, and illicit drug use have a negative impact on adherence in Uzbekistan, Spain, and  
32 Morocco (57-59). This is also comparable with retrospective studies conducted in Russia and  
33 New York which found that alcohol use disorder and drug addiction were significantly  
34 associated with non-adherence to anti-TB medications (8, 9). Likewise, the finding of this study  
35 is in line with studies conducted in different parts of Ethiopia which found khat, alcohol, and  
36 tobacco are the main factors for non-adherence to anti-TB medications (52, 56, 60). In our study,  
37 patients with substance use disorder were more than two times more likely not to follow their  
38 medication plan than patients without substance use disorders. This finding is in line with the  
39 finding of a study conducted in US that found the risk of missing a DOT appointment was 2.6  
40  
41  
42  
43  
44  
45  
46  
47  
48  
49  
50  
51  
52  
53  
54  
55  
56  
57  
58  
59  
60

1  
2  
3 times higher among patients with substance use disorder than in patients without drug  
4  
5 consumption (55).  
6

7  
8 In our study, khat use disorder turned out to be the most stringent factor that decreased  
9 adherence. This confirms earlier findings from Yemen (61) and Ethiopia (14, 60). A plausible  
10 explanation is that khat chewing disrupts night sleep (62) causing patients to oversleep which  
11 may lead to missing of the DOT appointments at the health facility. Another reason may be that  
12 khat is common substance in Ethiopia, and therefore less attention is paid to its use. Since little is  
13 known about the effect of khat on patients with tuberculosis (14), it may be considered as part of  
14 a normal social interaction (61).  
15  
16  
17  
18  
19  
20  
21  
22  
23

24  
25 A higher level of education was associated with non-adherence to anti-TB medications in our  
26 study. This result confirms the findings from Yemen that found more educated patients were  
27 19% times less likely to be adherent to their medication (61). Also, a study from Ethiopia  
28 showed that attending primary education was associated with non-adherence to anti-TB  
29 medications (60). Our findings are contrary to previous studies which have suggested that lower  
30 or no formal education decreases adherence to TB medication (13, 63). Our finding seems  
31 counterintuitive. However, our results are likely to be related to findings from a study indicating  
32 that persons with higher educational attainment might be reluctant to accept DOTS regimes (64).  
33  
34 Daily visits to the health facility have been reported as time consuming and probably  
35 stigmatizing for patients with a job (65). In this study, being merchant was associated with poor  
36 adherence to anti-TB medications. This might be due to patients miss their medications because  
37 of busy working schedule, but this needs further investigation.  
38  
39  
40  
41  
42  
43  
44  
45  
46  
47  
48  
49  
50  
51  
52  
53  
54  
55  
56  
57  
58  
59  
60

## Limitations

This study has some limitations. Due to social desirability, patients might minimize reporting of the amount and frequency of substance they were using. The tools used for alcohol and khat use disorder are not gold-standard diagnostic for the respective disorders. Also, measuring adherence based on pills count may not reflect the real adherence situation since some patients might not bring all leftover medications during the follow up. Likewise, follow up and data collections have been carried out by health professionals working in the respective TB clinics which might have biased their assessment of adherence. However, overestimating adherence may have biased our results towards a null effect and led to underestimating the effect of substance use disorders, so we are confident that our estimates are conservative. The participation of district tuberculosis focal persons and other health professionals in the supervision of data collection might have also introduced bias.

Furthermore, hospitalized patients, patients on re-treatment, and patients with MDR-TB were not included in this study, so that the results cannot be generalized for these patients. However, MDR-TB patients are under special treatment and surveillance so that including this group of patients might have biased the results. Finally, we did not assess the reasons for non-adherence. This should be part of a separate study going more into the details of the situation of persons with khat and alcohol problems.

## Strengths

The specific strengths of this study are the prospective cohort design, longitudinal data collection, including patients from urban and rural health institutions, intensive training given for

1  
2  
3 data collectors, multi-center data collection, and the use of standardized instruments to assess  
4  
5 exposure, outcomes, and explanatory variables.  
6  
7

## 8 **Conclusions**

9  
10  
11 Substance use disorders predict greater likelihood of anti-TB medication non-adherence among  
12  
13 TB patients. Also, khat and alcohol use disorders were the main risk factors for anti-TB  
14  
15 medication adherence. This finding implies the importance of integrating substance use disorders  
16  
17 screening and treatment into the existing tuberculosis services to reduce the effect of substances  
18  
19 on treatment outcomes including adherence.  
20  
21  
22

## 23 **Ethics approval and consent to participate**

24  
25  
26  
27 Ethical clearance was obtained from the ethical review committee of Jimma University, Institute  
28  
29 of Health. Written informed consent was obtained from each participant before participation.  
30  
31 Information obtained in due course was kept confidentially  
32  
33  
34

## 35 **Consent for publication**

36  
37  
38 Not applicable.  
39  
40

## 41 **Competing of interest**

42  
43  
44 All authors declare that they have no conflict of interests.  
45  
46

## 47 **Funding**

48  
49  
50 The study was funded by Jimma University Institute of Health with the grant number of  
51  
52 IHRPGC 1095/2017, Institute of Psychiatric Phenomics and Genomics (IPPG) with the grant  
53  
54  
55  
56  
57



1  
2  
3 number of 15106202/2018, and individual throughout data collection. The funders had no role in  
4  
5 this study including interpretation and preparation of the manuscript.  
6  
7

### 8 **Authors' contribution**

9  
10 MS contributed to the conceptualization, design, statistical analysis, and manuscript preparation.  
11  
12 MT, KA, WK, ET, YY, RS, and EG contributed to the design, analysis, and review of the  
13  
14 manuscript.  
15  
16  
17

### 18 **Author affiliations**

19  
20  
21  
22 <sup>1</sup> Department of Psychiatry, Medical Faculty, Jimma University, Jimma Ethiopia.  
23

24  
25 <sup>2</sup> Department of Psychiatry, St. Paul's Hospital Millennium Medical College, Addis Ababa, Ethiopia  
26

27  
28 <sup>3</sup> Department of Psychiatry and Psychotherapy, LMU Munich, Germany  
29

30  
31 <sup>4</sup> Institute of Psychiatric Phenomics and Genomics (IPPG), University Hospital, LMU Munich, Germany  
32

33  
34 <sup>5</sup> Department of Forensic Psychiatry, Isar Amper Klinikum, Munich, Germany  
35

36  
37 <sup>6</sup> Institute for Medical Information Processing, Biometrics and Epidemiology, LMU Munich, Munich, Germany  
38

39  
40 <sup>7</sup> Institute for Medical Information Processing, Biometrics and Epidemiology, LMU Munich, Munich, Germany  
41

42  
43 <sup>8</sup> Center for International Health, Ludwig Maxmillians University, Munich, Germany  
44

### 45 **Acknowledgment**

46  
47 We are grateful to the study participants for sacrificing their time to participate in the study. Our  
48  
49 gratitude is extended to Jimma University for funding the project. We are also grateful to IPPG  
50  
51 for funding part of the project. Our gratitude also extends to Dr. Michael Odenwald, who  
52  
53 contributed money from his pocket to support the project.  
54  
55  
56

## Availability of data

It will be available upon official request from interested individuals or organizations.

## References

1. Global tuberculosis report 2018. Geneva: World Health Organization; 2018. Licence: CC BY-NC-SA 3.0 IGO. [https://www.who.int/tb/publications/global\\_report/en/](https://www.who.int/tb/publications/global_report/en/) accessed on 24/07/2019
2. Grobusch MP, Kapata N. Global burden of tuberculosis: where we are and what to do. *Lancet Infect Dis.* 2018; 18(12):1291-3.
3. Patel V, Chisholm D, Dua T, Laxminarayan R, Medina-Mora ME. Mental, Neurological, and Substance Use Disorders: Disease Control Priorities, Third Edition (Volume 4). Washington (DC): The International Bank for Reconstruction and Development / The World Bank, 2016.
4. Floyd K, Glaziou P, Zumla A, Raviglione M. The global tuberculosis epidemic and progress in care, prevention, and research: an overview in year 3 of the end TB era. *Lancet Respir Med.* 2018; 6(4):299-314.
5. Global tuberculosis report 2016, Geneva, World Health Organization; 2016. <https://apps.who.int/medicinedocs/en/d/Js23098en/> accessed on 24/07/2019.
6. Dodor EA. Tuberculosis treatment default at the communicable diseases unit of Effia-Nkwanta Regional Hospital: a 2-year experience. *Int J Tuberc Lung Dis.* 2004; 8(11):1337-41.
7. Global tuberculosis report 2013. Geneva, World Health Organization; 2013. <http://apps.who.int/medicinedocs/en/m/abstract/Js21534en/> accessed on 25/07/2019

- 1  
2  
3 8. Gelmanova IY, Keshavjee S, Golubchikova VT, Berezina VI, Strelis AK, Yanova GV, et al.  
4  
5 Barriers to successful tuberculosis treatment in Tomsk, Russian Federation: non-adherence,  
6  
7 default and the acquisition of multidrug resistance. *Bulletin of the World Health Organization*.  
8  
9 2007; 85(9):703-11.  
10  
11
- 12  
13 9. Mekonnen HS, Azagew AW. Non-adherence to anti-tuberculosis treatment, reasons and  
14  
15 associated factors among TB patients attending at Gondar town health centers, Northwest  
16  
17 Ethiopia. *BMC Res Notes*. 2018; 11: 691.  
18  
19
- 20  
21 10. Mohd Shariff N, Shah SA, Kamaludin F. Predictors of death among drug-resistant  
22  
23 tuberculosis patients in Kuala Lumpur, Malaysia: A retrospective cohort study from 2009 to  
24  
25 2013. *J Glob Antimicrob Resist*. 2016; 6:102-7.  
26  
27
- 28  
29 11. Waitt CJ, Squire SB. A systematic review of risk factors for death in adults during and  
30  
31 after tuberculosis treatment. *Int J Tuberc Lung Dis*. 2011; 15(7):871-85.  
32  
33
- 34  
35 12. Federal Democratic Republic of Ethiopia MoH. Guidelines for clinical and programmatic  
36  
37 management of Tb, leprosy and Tb/HIV in Ethiopia fifth edition: MoH; 2012.  
38  
39
- 40  
41 13. Zegeye A, Dessie G, Wagnew F, Gebrie A, Islam SMS, Tesfaye B, et al. Prevalence and  
42  
43 determinants of anti-tuberculosis treatment non-adherence in Ethiopia: A systematic review and  
44  
45 meta-analysis. *PLoS One*. 2019; 14(1):e0210422.  
46  
47
- 48  
49 14. Ambaw F, Mayston R, Hanlon C, Medhin G, Alem A. Untreated depression and  
50  
51 tuberculosis treatment outcomes, quality of life and disability, Ethiopia. *Bulletin of the World  
52  
53 Health Organization*. 2018; 96(4):243-55.  
54  
55  
56  
57

- 1  
2  
3 15. Pelissari DM, Diaz-Quijano FA. Impact of alcohol disorder and the use of illicit drugs on  
4 tuberculosis treatment outcomes: a retrospective cohort study. *Arch Public Health*. 2018; 76:45.  
5  
6  
7  
8 16. Silva MR, Pereira JC, Costa RR, Dias JA, Guimaraes MDC, Leite ICG. Drug addiction  
9 and alcoholism as predictors for tuberculosis treatment default in Brazil: a prospective cohort  
10 study. *Epidemiol Infect*. 2017; 145(16):3516-24.  
11  
12  
13 17. Deiss RG, Rodwell TC, Garfein RS. Tuberculosis and illicit drug use: review and update.  
14 *Clin Infect Dis*. 2009 ;48(1):72-82.  
15  
16 18. Oeltmann JE, Kammerer JS, Pevzner ES, Moonan PK. Tuberculosis and substance abuse in  
17 the United States, 1997-2006. *Arch Intern Med*. 2009. 26;169(2):189-97  
18  
19 19. O'Connell R, Chishinga N, Kinyanda E, Patel V, Ayles H, Weiss HA, et al. Prevalence  
20 and correlates of alcohol dependence disorder among TB and HIV infected patients in Zambia.  
21 *PloS one*. 2013; 8(9):e74406.  
22  
23 20. Christensen AS, Roed C, Andersen PH, Andersen AB, Obel N. Long-term mortality in  
24 patients with pulmonary and extrapulmonary tuberculosis: a Danish nationwide cohort study.  
25 *Clinical epidemiology*. 2014; 6:405-21.  
26  
27 21. Fleming MF, Krupitsky E, Tsoy M, Zvartau E, Brazhenko N, Jakubowiak W, et al.  
28 Alcohol and drug use disorders, HIV status and drug resistance in a sample of Russian TB  
29 patients. *The international journal of tuberculosis and lung disease: the official journal of the*  
30 *International Union against Tuberculosis and Lung Disease*. 2006; 10(5):565-70.  
31  
32  
33  
34  
35  
36  
37  
38  
39  
40  
41  
42  
43  
44  
45  
46  
47  
48  
49  
50  
51  
52  
53  
54  
55  
56  
57  
58  
59  
60

- 1  
2  
3 22. Skrahina A, Hurevich H, Zalutskaya A, Sahalchyk E, Astrauko A, Hoffner S, et al.  
4  
5 Multidrug-resistant tuberculosis in Belarus: the size of the problem and associated risk factors.  
6  
7 Bulletin of the World Health Organization. 2013; 91(1):36-45.  
8  
9  
10  
11 23. Luqman W, Danowski TS. The use of khat (*Catha edulis*) in Yemen. Social and medical  
12  
13 observations. *Ann Intern Med*. 1976;85(2):246-9.  
14  
15  
16 24. Gebissa E. Khat in the Horn of Africa: historical perspectives and current trends. *J*  
17  
18 *Ethnopharmacol*. 2010; 132(3):607-14.  
19  
20  
21 25. Dhaifalah I, Santavy J. Khat habit and its health effect. A natural amphetamine. *Biomed*  
22  
23 *Pap Med Fac Univ Palacky Olomouc Czech Repub*. 2004; 148(1):11-5.  
24  
25  
26 26. Alfaifi H, Abdelwahab SI, Mohan S, Elhassan Taha MM, Syame SM, Shaala LA, et al.  
27  
28 *Catha edulis* Forsk. (Khat): Evaluation of its Antidepressant-like Activity. *Pharmacognosy*  
29  
30 *magazine*. 2017; 13(Suppl 2):S354-s8.  
31  
32  
33 27. Wolde D, Tadesse M, Abdella K, Abebe G, Ali S. Tuberculosis among Jimma University  
34  
35 Undergraduate Students: First Insight about the Burden of Tuberculosis in Ethiopia Universities-  
36  
37 Cross-Sectional Study. *Int J Bacteriol*. 2017;9840670.  
38  
39  
40  
41 28. Alemu YM, Awoke W, Wilder-Smith A. Determinants for tuberculosis in HIV-infected  
42  
43 adults in Northwest Ethiopia: a multicentre case-control study. *BMJ Open*. 2016; 6(4):e009058.  
44  
45  
46 29. Jaber AA, Khan AH, Sulaiman SA, Ahmad N. Role of socio-demographical factors on  
47  
48 tuberculosis outcome in Yemen. *International journal of mycobacteriology*. 2016; 5(1):S20.  
49  
50  
51  
52  
53  
54  
55  
56  
57  
58  
59  
60

- 1  
2  
3 30. Legesse M, Ameni G, Mamo G, Medhin G, Shawel D, Bjune G, et al. Knowledge and  
4 perception of pulmonary tuberculosis in pastoral communities in the middle and Lower Awash  
5 Valley of Afar region, Ethiopia. *BMC Public Health*. 2010; 10:187.  
6  
7  
8  
9  
10  
11 31. Alvi A, Rizwan M, Sunosi RA, Bin Ali Jerah A. Does khat chewing increases the risk of  
12 *Mycobacterium tuberculosis* infection by macrophage immune modulation? *Med Hypotheses*.  
13 2014; 82(6):667-9.  
14  
15  
16  
17  
18 32. Jaber AA, Khan AH, Syed Sulaiman SA, Ahmad N, Anaam MS. Evaluation of Health-  
19 Related Quality of Life among Tuberculosis Patients in Two Cities in Yemen. *PLoS One*. 2016;  
20 11(6):e0156258.  
21  
22  
23  
24  
25  
26 33. Jaber AAS, Khan AH, Sulaiman SAS. Evaluating treatment outcomes and durations  
27 among cases of smear-positive pulmonary tuberculosis in Yemen: a prospective follow-up study.  
28 *J Pharm Policy Pract*. 2017; 10:36.  
29  
30  
31  
32  
33  
34 34. Alvi A, Fatima N, Jerah AA, Rizwan M, Hobani YH, Sunosi RA, et al. Correlation  
35 between Resistin, Tuberculosis and Khat Addiction: A Study from South Western Province of  
36 Saudi Arabia. *PLoS One*. 2015; 10(10):e0140245.  
37  
38  
39  
40  
41  
42 35. Anaam MS I, Al Serouri AW, Aldobhani A. Factors affecting patients' compliance to  
43 anti-tuberculosis treatment in Yemen: *JPHSR*; 2013.  
44  
45  
46  
47 36. Cox G, Rampes H. Adverse effects of khat: a review. *Advances in Psychiatric Treatment*.  
48 2018; 9(6):456-63.  
49  
50  
51  
52 37. EPIInfoTM. <http://apps.who.int/medicinedocs/en/m/abstract/Js21534en/> accessed on  
53 19/08/2019  
54  
55  
56  
57  
58  
59  
60

1  
2  
3 38. Babor TF, Higgins-Biddle JC, Saunders JB, Monteiro MG. The Alcohol Use Disorders  
4 Identification Test Guidelines for Use in Primary Care. World Health Organization. 2001.

5  
6  
7  
8 [https://apps.who.int/iris/bitstream/handle/10665/67205/WHO\\_MSD\\_MSB\\_01.6a.pdf;jsessionid=](https://apps.who.int/iris/bitstream/handle/10665/67205/WHO_MSD_MSB_01.6a.pdf;jsessionid=B5D5F8F1F1B82FE622D04E8F02635F05?sequence=1)  
9 [B5D5F8F1F1B82FE622D04E8F02635F05?sequence=1](https://apps.who.int/iris/bitstream/handle/10665/67205/WHO_MSD_MSB_01.6a.pdf;jsessionid=B5D5F8F1F1B82FE622D04E8F02635F05?sequence=1) accessed on 20/07/2019.

10  
11  
12  
13  
14 39. Babor TF, Higgins-Biddle JC, Saunders JB, Monteiro MG. The Alcohol Use Disorders  
15 Identification Test Guidelines for Use in Primary Care. World Health Organization. 2001.

16  
17  
18  
19 40. Soboka M, Tesfaye M, Feyissa GT, Hanlon C. Alcohol use disorders and associated  
20 factors among people living with HIV who are attending services in south west Ethiopia. BMC  
21 research notes. 2014; 7:828.

22  
23  
24  
25  
26  
27 41. Mikami I, Akechi T, Kugaya A, Okuyama T, Nakano T, Okamura H, et al. Screening for  
28 nicotine dependence among smoking-related cancer patients. Japanese journal of cancer research  
29 : Gann. 1999; 90(10):1071-5.

30  
31  
32  
33  
34  
35 42. Average Salary in Ethiopia. [http://www.salaryexplorer.com/salary-](http://www.salaryexplorer.com/salary-survey.php?loc=69&loctype=1)  
36 [survey.php?loc=69&loctype=1](http://www.salaryexplorer.com/salary-survey.php?loc=69&loctype=1) accessed on 09/07/2019.

37  
38  
39  
40 43. Instrument Manual: Oslo-3 Social Support Scale (OSS-3)2006.  
41 [https://circabc.europa.eu/webdav/CircaBC/ESTAT/healthtf/Library/ehis\\_wave\\_2/methodology\\_e](https://circabc.europa.eu/webdav/CircaBC/ESTAT/healthtf/Library/ehis_wave_2/methodology_ehis/development/instruments/Manual_OSS_3.pdf)  
42 [his/development/instruments/Manual\\_OSS\\_3.pdf](https://circabc.europa.eu/webdav/CircaBC/ESTAT/healthtf/Library/ehis_wave_2/methodology_ehis/development/instruments/Manual_OSS_3.pdf) , Accessed on 08/06/2019

43  
44  
45  
46  
47  
48 44. Duko B, Gebeyehu A, Ayano G. Prevalence and correlates of depression and anxiety  
49 among patients with tuberculosis at WolaitaSodo University Hospital and Sodo Health Center,  
50 WolaitaSodo, South Ethiopia, Cross sectional study. BMC psychiatry. 2015; 15:214.

- 1  
2  
3 45. Coates J SA, Bilinsky P. Household Food Insecurity Access Scale (HFIAS) for  
4 measurement of food access: Indicator guide (V.3): Washington, D.C.: FHI 360/FANTA; 2007.  
5  
6  
7  
8 [http://www.fao.org/fileadmin/user\\_upload/eufao-fsi4dm/doc-training/hfias.pdf](http://www.fao.org/fileadmin/user_upload/eufao-fsi4dm/doc-training/hfias.pdf) accessed on  
9  
10 10/01/2017  
11  
12  
13  
14 46. Tesfaye M, Kaestel P, Olsen MF, Girma T, Yilma D, Abdissa A, et al. Food insecurity,  
15 mental health and quality of life among people living with HIV commencing antiretroviral  
16 treatment in Ethiopia: a cross-sectional study. *Health and quality of life outcomes*. 2016; 14:37.  
17  
18  
19  
20  
21 47. Maes KC, Hadley C, Tesfaye F, Shifferaw S, Tesfaye YA. Food insecurity among  
22 volunteer AIDS caregivers in Addis Ababa, Ethiopia was highly prevalent but buffered from the  
23 2008 food crisis. *The Journal of nutrition*. 2009; 139(9):1758-64.  
24  
25  
26  
27  
28  
29 48. Greenland S, Pearl J, Robins JM. Causal diagrams for epidemiologic research.  
30 *Epidemiology*. 1999; 10(1):37-48.  
31  
32  
33  
34  
35 49. Textor J, Hardt J, Knuppel S. DAGitty: a graphical tool for analyzing causal diagrams.  
36 *Epidemiology*. 2011; 22(5):745.  
37  
38  
39  
40 50. Shrier I, Platt RW. Reducing bias through directed acyclic graphs. *BMC Med Res*  
41 *Methodol*. 2008; 8:70.  
42  
43  
44  
45 51. Woimo TT, Yimer WK, Bati T, Gesesew HA. The prevalence and factors associated for  
46 anti-tuberculosis treatment non-adherence among pulmonary tuberculosis patients in public  
47 health care facilities in South Ethiopia: a cross-sectional study. *BMC Public Health*. 2017;  
48 17(1):269.  
49  
50  
51  
52  
53  
54  
55  
56  
57  
58  
59  
60



- 1  
2  
3 52. Mekonnen HS, Azagew AW. Non-adherence to anti-tuberculosis treatment, reasons and  
4 associated factors among TB patients attending at Gondar town health centers, Northwest  
5 Ethiopia. BMC research notes. 2018; 11(1):691.  
6  
7  
8  
9  
10  
11 53. Tola HH, Garmaroudi G, Shojaeizadeh D, Tol A, Yekaninejad MS, Ejeta LT, et al. The  
12 Effect of Psychosocial Factors and Patients' Perception of Tuberculosis Treatment Non-  
13 Adherence in Addis Ababa, Ethiopia. Ethiopian journal of health sciences. 2017; 27(5):447-58.  
14  
15  
16  
17  
18 54. Adane AA, Alene KA, Koye DN, Zeleke BM. Non-adherence to anti-tuberculosis  
19 treatment and determinant factors among patients with tuberculosis in northwest Ethiopia. PLoS  
20 One. 2013; 8(11):e78791.  
21  
22  
23  
24  
25  
26 55. Ricks PM, Hershov RC, Rahimian A, Huo D, Johnson W, Prachand N, et al. A  
27 randomized trial comparing standard outcomes in two treatment models for substance users with  
28 tuberculosis. Int J Tuberc Lung Dis. 2015; 19(3):326-32.  
29  
30  
31  
32  
33  
34 56. Sahile Z, Yared A, Kaba M. Patients' experiences and perceptions on associates of TB  
35 treatment adherence: a qualitative study on DOTS service in public health centers in Addis  
36 Ababa, Ethiopia. BMC Public Health. 2018; 18(1):462.  
37  
38  
39  
40  
41  
42 57. Hasker E, Khodjikhhanov M, Usarova S, Asamidinov U, Yuldashova U, van der Werf MJ,  
43 et al. Default from tuberculosis treatment in Tashkent, Uzbekistan; who are these defaulters and  
44 why do they default? BMC Infect Dis. 2008; 8:97.  
45  
46  
47  
48  
49  
50 58. Cayla JA, Caminero JA, Rey R, Lara N, Valles X, Galdos-Tanguis H. Current status of  
51 treatment completion and fatality among tuberculosis patients in Spain. Int J Tuberc Lung Dis.  
52 2004; 8(4):458-64.  
53  
54  
55  
56  
57

- 1  
2  
3 59. Dooley KE, Lahlou O, Ghali I, Knudsen J, Elmessaoudi MD, Cherkaoui I, et al. Risk  
4 factors for tuberculosis treatment failure, default, or relapse and outcomes of retreatment in  
5 Morocco. *BMC Public Health*. 2011; 11:140.  
6  
7  
8  
9  
10  
11 60. Tesfahuneygn G, Medhin G, Legesse M. Adherence to Anti-tuberculosis treatment and  
12 treatment outcomes among tuberculosis patients in Alamata District, northeast Ethiopia. *BMC*  
13 *research notes*. 2015; 8:503.  
14  
15  
16  
17  
18 61. Anaam MS, Mohamed Ibrahim MI, Al Serouri AW, Aldobhani A. Factors affecting  
19 patients' compliance to anti-tuberculosis treatment in Yemen. *Journal of Pharmaceutical Health*  
20 *Services Research*. 2013; 4(2):115-22.  
21  
22  
23  
24  
25  
26 62. Adane K, Spigt M, Ferede S, Asmelash T, Abebe M, Dinant GJ. Half of Pulmonary  
27 Tuberculosis Cases Were Left Undiagnosed in Prisons of the Tigray Region of Ethiopia:  
28 Implications for Tuberculosis Control. *PLoS One*. 2016; 11(2):e0149453.  
29  
30  
31  
32  
33  
34 63. Fang XH, Dan YL, Liu J, Jun L, Zhang ZP, Kan XH, et al. Factors influencing  
35 completion of treatment among pulmonary tuberculosis patients. *Patient Prefer Adherence*. 2019;  
36 13:491-6.  
37  
38  
39  
40  
41  
42 64. Kawatsu L, Uchimura K, Ohkado A, Kato S. A combination of quantitative and  
43 qualitative methods in investigating risk factors for lost to follow-up for tuberculosis treatment in  
44 Japan - Are physicians and nurses at a particular risk? *PLoS One*. 2018; 13(6):e0198075.  
45  
46  
47  
48  
49 65. Gebreweld FH, Kifle MM, Gebremicheal FE, Simel LL, Gezae MM, Ghebreyesus SS, et  
50 al. Factors influencing adherence to tuberculosis treatment in Asmara, Eritrea: a qualitative  
51 study. *J Health Popul Nutr*. 2018; 37(1):1.  
52  
53  
54  
55  
56  
57  
58  
59  
60

# Reporting checklist for cohort study.

Based on the STROBE cohort guidelines.

## Instructions to authors

Complete this checklist by entering the page numbers from your manuscript where readers will find each of the items listed below.

Your article may not currently address all the items on the checklist. Please modify your text to include the missing information. If you are certain that an item does not apply, please write "n/a" and provide a short explanation.

Upload your completed checklist as an extra file when you submit to a journal.

In your methods section, say that you used the STROBE cohort reporting guidelines, and cite them as:

von Elm E, Altman DG, Egger M, Pocock SJ, Gøtzsche PC, Vandenbroucke JP. The Strengthening of Reporting of Observational Studies in Epidemiology (STROBE) Statement: guidelines for reporting observational studies.

|                           |                     |                                                                                    | Page   |
|---------------------------|---------------------|------------------------------------------------------------------------------------|--------|
|                           |                     | Reporting Item                                                                     | Number |
| <b>Title and abstract</b> |                     |                                                                                    |        |
| Title                     | <a href="#">#1a</a> | Indicate the study's design with a commonly used term in the title or the abstract | 1      |
| Abstract                  | <a href="#">#1b</a> | Provide in the abstract an informative and balanced summary                        | 2,3    |

of what was done and what was found

## Introduction

Background / [#2](#) Explain the scientific background and rationale for the 4-6  
 rationale investigation being reported

Objectives [#3](#) State specific objectives, including any prespecified 6  
 hypotheses

## Methods

Study design [#4](#) Present key elements of study design early in the paper 6

Setting [#5](#) Describe the setting, locations, and relevant dates, including 6  
 periods of recruitment, exposure, follow-up, and data collection

Eligibility criteria [#6a](#) Give the eligibility criteria, and the sources and methods of 6  
 selection of participants. Describe methods of follow-up.

Eligibility criteria [#6b](#) For matched studies, give matching criteria and number of  
 exposed and unexposed

Variables [#7](#) Clearly define all outcomes, exposures, predictors, potential 7-10  
 confounders, and effect modifiers. Give diagnostic criteria, if  
 applicable

Data sources / [#8](#) For each variable of interest give sources of data and details of 7-10  
 measurement methods of assessment (measurement). Describe  
 comparability of assessment methods if there is more than one  
 group. Give information separately for for exposed and  
 unexposed groups if applicable.

|    |                |                      |                                                                   |        |
|----|----------------|----------------------|-------------------------------------------------------------------|--------|
| 1  | Bias           | <a href="#">#9</a>   | Describe any efforts to address potential sources of bias         | 10,11  |
| 2  |                |                      |                                                                   |        |
| 3  |                |                      |                                                                   |        |
| 4  | Study size     | <a href="#">#10</a>  | Explain how the study size was arrived at                         | 7      |
| 5  |                |                      |                                                                   |        |
| 6  |                |                      |                                                                   |        |
| 7  | Quantitative   | <a href="#">#11</a>  | Explain how quantitative variables were handled in the            | 10, 11 |
| 8  | variables      |                      | analyses. If applicable, describe which groupings were chosen,    |        |
| 9  |                |                      | and why                                                           |        |
| 10 |                |                      |                                                                   |        |
| 11 |                |                      |                                                                   |        |
| 12 |                |                      |                                                                   |        |
| 13 |                |                      |                                                                   |        |
| 14 |                |                      |                                                                   |        |
| 15 | Statistical    | <a href="#">#12a</a> | Describe all statistical methods, including those used to control | 10,11  |
| 16 | methods        |                      | for confounding                                                   |        |
| 17 |                |                      |                                                                   |        |
| 18 |                |                      |                                                                   |        |
| 19 |                |                      |                                                                   |        |
| 20 | Statistical    | <a href="#">#12b</a> | Describe any methods used to examine subgroups and                |        |
| 21 | methods        |                      | interactions                                                      |        |
| 22 |                |                      |                                                                   |        |
| 23 |                |                      |                                                                   |        |
| 24 |                |                      |                                                                   |        |
| 25 |                |                      |                                                                   |        |
| 26 | Statistical    | <a href="#">#12c</a> | Explain how missing data were addressed                           | 10     |
| 27 | methods        |                      |                                                                   |        |
| 28 |                |                      |                                                                   |        |
| 29 |                |                      |                                                                   |        |
| 30 |                |                      |                                                                   |        |
| 31 | Statistical    | <a href="#">#12d</a> | If applicable, explain how loss to follow-up was addressed        |        |
| 32 | methods        |                      |                                                                   |        |
| 33 |                |                      |                                                                   |        |
| 34 |                |                      |                                                                   |        |
| 35 |                |                      |                                                                   |        |
| 36 | Statistical    | <a href="#">#12e</a> | Describe any sensitivity analyses                                 |        |
| 37 | methods        |                      |                                                                   |        |
| 38 |                |                      |                                                                   |        |
| 39 |                |                      |                                                                   |        |
| 40 |                |                      |                                                                   |        |
| 41 |                |                      |                                                                   |        |
| 42 | <b>Results</b> |                      |                                                                   |        |
| 43 |                |                      |                                                                   |        |
| 44 |                |                      |                                                                   |        |
| 45 | Participants   | <a href="#">#13a</a> | Report numbers of individuals at each stage of study—eg           | 12     |
| 46 |                |                      | numbers potentially eligible, examined for eligibility, confirmed |        |
| 47 |                |                      | eligible, included in the study, completing follow-up, and        |        |
| 48 |                |                      | analysed. Give information separately for for exposed and         |        |
| 49 |                |                      | unexposed groups if applicable.                                   |        |
| 50 |                |                      |                                                                   |        |
| 51 |                |                      |                                                                   |        |
| 52 |                |                      |                                                                   |        |
| 53 |                |                      |                                                                   |        |
| 54 |                |                      |                                                                   |        |
| 55 |                |                      |                                                                   |        |
| 56 |                |                      |                                                                   |        |
| 57 | Participants   | <a href="#">#13b</a> | Give reasons for non-participation at each stage                  |        |
| 58 |                |                      |                                                                   |        |
| 59 |                |                      |                                                                   |        |
| 60 |                |                      |                                                                   |        |

|    |                   |                      |                                                                   |        |
|----|-------------------|----------------------|-------------------------------------------------------------------|--------|
| 1  | Participants      | <a href="#">#13c</a> | Consider use of a flow diagram                                    |        |
| 2  |                   |                      |                                                                   |        |
| 3  |                   |                      |                                                                   |        |
| 4  | Descriptive data  | <a href="#">#14a</a> | Give characteristics of study participants (eg demographic,       | 12, 13 |
| 5  |                   |                      | clinical, social) and information on exposures and potential      |        |
| 6  |                   |                      | confounders. Give information separately for exposed and          |        |
| 7  |                   |                      | unexposed groups if applicable.                                   |        |
| 8  |                   |                      |                                                                   |        |
| 9  |                   |                      |                                                                   |        |
| 10 |                   |                      |                                                                   |        |
| 11 |                   |                      |                                                                   |        |
| 12 |                   |                      |                                                                   |        |
| 13 |                   |                      |                                                                   |        |
| 14 | Descriptive data  | <a href="#">#14b</a> | Indicate number of participants with missing data for each        | 12     |
| 15 |                   |                      | variable of interest                                              |        |
| 16 |                   |                      |                                                                   |        |
| 17 |                   |                      |                                                                   |        |
| 18 |                   |                      |                                                                   |        |
| 19 | Descriptive data  | <a href="#">#14c</a> | Summarise follow-up time (eg, average and total amount)           |        |
| 20 |                   |                      |                                                                   |        |
| 21 |                   |                      |                                                                   |        |
| 22 |                   |                      |                                                                   |        |
| 23 | Outcome data      | <a href="#">#15</a>  | Report numbers of outcome events or summary measures              | 14, 15 |
| 24 |                   |                      | over time. Give information separately for exposed and            |        |
| 25 |                   |                      | unexposed groups if applicable.                                   |        |
| 26 |                   |                      |                                                                   |        |
| 27 |                   |                      |                                                                   |        |
| 28 |                   |                      |                                                                   |        |
| 29 |                   |                      |                                                                   |        |
| 30 | Main results      | <a href="#">#16a</a> | Give unadjusted estimates and, if applicable, confounder-         | 14-18  |
| 31 |                   |                      | adjusted estimates and their precision (eg, 95% confidence        |        |
| 32 |                   |                      | interval). Make clear which confounders were adjusted for and     |        |
| 33 |                   |                      | why they were included                                            |        |
| 34 |                   |                      |                                                                   |        |
| 35 |                   |                      |                                                                   |        |
| 36 |                   |                      |                                                                   |        |
| 37 |                   |                      |                                                                   |        |
| 38 |                   |                      |                                                                   |        |
| 39 |                   |                      |                                                                   |        |
| 40 | Main results      | <a href="#">#16b</a> | Report category boundaries when continuous variables were         |        |
| 41 |                   |                      | categorized                                                       |        |
| 42 |                   |                      |                                                                   |        |
| 43 |                   |                      |                                                                   |        |
| 44 |                   |                      |                                                                   |        |
| 45 | Main results      | <a href="#">#16c</a> | If relevant, consider translating estimates of relative risk into |        |
| 46 |                   |                      | absolute risk for a meaningful time period                        |        |
| 47 |                   |                      |                                                                   |        |
| 48 |                   |                      |                                                                   |        |
| 49 |                   |                      |                                                                   |        |
| 50 |                   |                      |                                                                   |        |
| 51 | Other analyses    | <a href="#">#17</a>  | Report other analyses done—e.g., analyses of subgroups and        |        |
| 52 |                   |                      | interactions, and sensitivity analyses                            |        |
| 53 |                   |                      |                                                                   |        |
| 54 |                   |                      |                                                                   |        |
| 55 |                   |                      |                                                                   |        |
| 56 | <b>Discussion</b> |                      |                                                                   |        |
| 57 |                   |                      |                                                                   |        |
| 58 |                   |                      |                                                                   |        |
| 59 |                   |                      |                                                                   |        |
| 60 |                   |                      |                                                                   |        |

|    |                          |                     |                                                                      |       |
|----|--------------------------|---------------------|----------------------------------------------------------------------|-------|
| 1  | Key results              | <a href="#">#18</a> | Summarise key results with reference to study objectives             | 19-21 |
| 2  |                          |                     |                                                                      |       |
| 3  |                          |                     |                                                                      |       |
| 4  | Limitations              | <a href="#">#19</a> | Discuss limitations of the study, taking into account sources of     | 21    |
| 5  |                          |                     | potential bias or imprecision. Discuss both direction and            |       |
| 6  |                          |                     | magnitude of any potential bias.                                     |       |
| 7  |                          |                     |                                                                      |       |
| 8  |                          |                     |                                                                      |       |
| 9  |                          |                     |                                                                      |       |
| 10 |                          |                     |                                                                      |       |
| 11 |                          |                     |                                                                      |       |
| 12 | Interpretation           | <a href="#">#20</a> | Give a cautious overall interpretation considering objectives,       | 19-21 |
| 13 |                          |                     | limitations, multiplicity of analyses, results from similar studies, |       |
| 14 |                          |                     | and other relevant evidence.                                         |       |
| 15 |                          |                     |                                                                      |       |
| 16 |                          |                     |                                                                      |       |
| 17 |                          |                     |                                                                      |       |
| 18 |                          |                     |                                                                      |       |
| 19 | Generalisability         | <a href="#">#21</a> | Discuss the generalisability (external validity) of the study        |       |
| 20 |                          |                     | results                                                              |       |
| 21 |                          |                     |                                                                      |       |
| 22 |                          |                     |                                                                      |       |
| 23 |                          |                     |                                                                      |       |
| 24 |                          |                     |                                                                      |       |
| 25 | <b>Other Information</b> |                     |                                                                      |       |
| 26 |                          |                     |                                                                      |       |
| 27 |                          |                     |                                                                      |       |
| 28 | Funding                  | <a href="#">#22</a> | Give the source of funding and the role of the funders for the       | 23    |
| 29 |                          |                     | present study and, if applicable, for the original study on which    |       |
| 30 |                          |                     | the present article is based                                         |       |
| 31 |                          |                     |                                                                      |       |
| 32 |                          |                     |                                                                      |       |
| 33 |                          |                     |                                                                      |       |
| 34 |                          |                     |                                                                      |       |
| 35 |                          |                     |                                                                      |       |

36 None The STROBE checklist is distributed under the terms of the Creative Commons Attribution  
37 License CC-BY. This checklist can be completed online using <https://www.goodreports.org/>, a tool  
38 made by the [EQUATOR Network](#) in collaboration with [Penelope.ai](#)  
39  
40  
41  
42  
43  
44  
45  
46  
47  
48  
49  
50  
51  
52  
53  
54  
55  
56  
57  
58  
59

# BMJ Open

## Substance use disorders and adherence to anti-tuberculosis medications in Southwest Ethiopia: A prospective cohort study

|                                 |                                                                                                                                                                                                                                                                                                                                                                                                                                                                                                                                                                                                                                                                                                                                                                                                                                                                                                                                                                                                                                                                                                                                                                                                                                                                                                                                                                                     |
|---------------------------------|-------------------------------------------------------------------------------------------------------------------------------------------------------------------------------------------------------------------------------------------------------------------------------------------------------------------------------------------------------------------------------------------------------------------------------------------------------------------------------------------------------------------------------------------------------------------------------------------------------------------------------------------------------------------------------------------------------------------------------------------------------------------------------------------------------------------------------------------------------------------------------------------------------------------------------------------------------------------------------------------------------------------------------------------------------------------------------------------------------------------------------------------------------------------------------------------------------------------------------------------------------------------------------------------------------------------------------------------------------------------------------------|
| Journal:                        | <i>BMJ Open</i>                                                                                                                                                                                                                                                                                                                                                                                                                                                                                                                                                                                                                                                                                                                                                                                                                                                                                                                                                                                                                                                                                                                                                                                                                                                                                                                                                                     |
| Manuscript ID                   | bmjopen-2020-043050.R3                                                                                                                                                                                                                                                                                                                                                                                                                                                                                                                                                                                                                                                                                                                                                                                                                                                                                                                                                                                                                                                                                                                                                                                                                                                                                                                                                              |
| Article Type:                   | Original research                                                                                                                                                                                                                                                                                                                                                                                                                                                                                                                                                                                                                                                                                                                                                                                                                                                                                                                                                                                                                                                                                                                                                                                                                                                                                                                                                                   |
| Date Submitted by the Author:   | 26-May-2021                                                                                                                                                                                                                                                                                                                                                                                                                                                                                                                                                                                                                                                                                                                                                                                                                                                                                                                                                                                                                                                                                                                                                                                                                                                                                                                                                                         |
| Complete List of Authors:       | Daba, Matiwas; Jimma University College of Public Health and Medical Sciences, Psychiatry; Center for International Health, Ludwig Maxmillians University, Munich, Germany<br>Tesfaye, Markos ; Department of Psychiatry, St. Paul's Hospital Millennium Medical College, Addis Ababa, Ethiopia, Psychiatry; Center for International Health, Ludwig Maxmillians University, Munich, Germany<br>Adorjan, Kristina; Department of Psychiatry and Psychotherapy, LMU Munich, Germany; Institute of Psychiatric Phenomics and Genomics (IPPG), University Hospital, LMU Munich, Germany<br>Krahl, Wolfgang ; Department of Forensic Psychiatry, Isar Amper Klinikum, Munich, Germany, Forensic Psychiatry; Center for International Health, Ludwig Maxmillians University, Munich, Germany<br>Tesfaye, Elias ; Department of Psychiatry, Medical Faculty, Jimma University, Jimma Ethiopia, Psychiatry<br>Yitayih, Yimenu; Jimma University College of Public Health and Medical Sciences, Psychiatry<br>Strobl, Ralf; Ludwig-Maximilians-Universitat Munchen, Institute for Medical Information Processing, Biometrics and Epidemiology<br>Grill, Eva; Ludwig Maximilians University Munich, Institute for Medical Information Processing, Biometrics and Epidemiology, LMU Munich, Munich, Germany ; Center for International Health, Ludwig Maxmillians University, Munich, Germany |
| <b>Primary Subject Heading</b>: | Addiction                                                                                                                                                                                                                                                                                                                                                                                                                                                                                                                                                                                                                                                                                                                                                                                                                                                                                                                                                                                                                                                                                                                                                                                                                                                                                                                                                                           |
| Secondary Subject Heading:      | Addiction, Infectious diseases, Mental health                                                                                                                                                                                                                                                                                                                                                                                                                                                                                                                                                                                                                                                                                                                                                                                                                                                                                                                                                                                                                                                                                                                                                                                                                                                                                                                                       |
| Keywords:                       | Substance misuse < PSYCHIATRY, Tuberculosis < INFECTIOUS DISEASES, INFECTIOUS DISEASES, CLINICAL PHARMACOLOGY                                                                                                                                                                                                                                                                                                                                                                                                                                                                                                                                                                                                                                                                                                                                                                                                                                                                                                                                                                                                                                                                                                                                                                                                                                                                       |
|                                 |                                                                                                                                                                                                                                                                                                                                                                                                                                                                                                                                                                                                                                                                                                                                                                                                                                                                                                                                                                                                                                                                                                                                                                                                                                                                                                                                                                                     |

SCHOLARONE™  
Manuscripts





I, the Submitting Author has the right to grant and does grant on behalf of all authors of the Work (as defined in the below author licence), an exclusive licence and/or a non-exclusive licence for contributions from authors who are: i) UK Crown employees; ii) where BMJ has agreed a CC-BY licence shall apply, and/or iii) in accordance with the terms applicable for US Federal Government officers or employees acting as part of their official duties; on a worldwide, perpetual, irrevocable, royalty-free basis to BMJ Publishing Group Ltd ("BMJ") its licensees and where the relevant Journal is co-owned by BMJ to the co-owners of the Journal, to publish the Work in this journal and any other BMJ products and to exploit all rights, as set out in our [licence](#).

The Submitting Author accepts and understands that any supply made under these terms is made by BMJ to the Submitting Author unless you are acting as an employee on behalf of your employer or a postgraduate student of an affiliated institution which is paying any applicable article publishing charge ("APC") for Open Access articles. Where the Submitting Author wishes to make the Work available on an Open Access basis (and intends to pay the relevant APC), the terms of reuse of such Open Access shall be governed by a Creative Commons licence – details of these licences and which [Creative Commons](#) licence will apply to this Work are set out in our licence referred to above.

Other than as permitted in any relevant BMJ Author's Self Archiving Policies, I confirm this Work has not been accepted for publication elsewhere, is not being considered for publication elsewhere and does not duplicate material already published. I confirm all authors consent to publication of this Work and authorise the granting of this licence.

1  
2  
3  
4  
5 **Substance use disorders and adherence to anti-tuberculosis medications in Southwest**  
6  
7 **Ethiopia: A prospective cohort study**  
8

9  
10 Matiws Soboka<sup>1\*,8</sup>, Markos Tesfaye<sup>2,8</sup>, Kristina Adorjan<sup>3,4,8</sup>, Wolfgang Krahl<sup>5,8</sup>, Elias  
11  
12 Tesfaye<sup>1</sup>, Yimenu Yitayih<sup>1</sup>, Ralf Strobl<sup>6</sup>, Eva Grill<sup>6,8</sup>  
13  
14  
15  
16  
17  
18  
19  
20

21 **\* Corresponding author:** Matiws Soboka, Department of Psychiatry, Medical Faculty, Jimma University, Jimma  
22  
23 Ethiopia, Center for International Health, Ludwig Maxmillians University, Munich, Germany  
24

25  
26 **Email:** [matiwos2004@yahoo.com](mailto:matiwos2004@yahoo.com)  
27

28  
29 **Phone:** +251913792348  
30

31 <sup>1</sup> Department of Psychiatry, Medical Faculty, Jimma University, Jimma Ethiopia.  
32

33  
34 <sup>2</sup> Department of Psychiatry, St. Paul's Hospital Millennium Medical College, Addis Ababa, Ethiopia  
35

36  
37 <sup>3</sup> Department of Psychiatry and Psychotherapy, LMU Munich, Germany  
38

39  
40 <sup>4</sup> Institute of Psychiatric Phenomics and Genomics (IPPG), University Hospital, LMU Munich, Germany  
41

42  
43 <sup>5</sup>Department of Forensic Psychiatry, Isar Amper Klinikum, Munich, Germany  
44

45  
46 <sup>6</sup> Institute for Medical Information Processing, Biometrics and Epidemiology, LMU Munich, Munich, Germany  
47

48  
49 <sup>7</sup> Institute for Medical Information Processing, Biometrics and Epidemiology, LMU Munich, Munich, Germany  
50

51  
52 <sup>8</sup>Center for International Health, Ludwig Maxmillians University, Munich, Germany  
53  
54  
55  
56  
57  
58  
59  
60

## Abstract

**Objectives:** In Ethiopia, little is known about the association between substance use disorders and adherence to anti-TB medications. Therefore, the objective of this study was to assess the effect of substance use disorders on adherence to anti-TB medications in Southwest Ethiopia.

**Design:** Prospective cohort study.

**Settings:** Patients were recruited from 22 health centers and four hospitals in Southwest Ethiopia.

**Participants:** This study was conducted among 268 patients with tuberculosis, aged 18-80 in Southwest Ethiopia between October 2017 and October 2018. At baseline, patients who were exposed substance use disorders (134 patients) and unexposed to substance use disorders (134 patients) were recruited. Patients were followed for six months, and data were collected on three occasions.

**Main outcome measure:** Adherence to anti-TB medications.

**Results:** Patients with substance use disorders had consistently higher prevalence of non-adherence than those without, 16.4% vs. 3.0% at baseline, 41.7% vs 14.4% at two month follow up, and 45.7% vs 10.8% at six month follow up assessments. Patients with khat use disorder were 3.8 times more likely to be non-adherent to anti-TB medications than patients without khat use disorder (aOR 3.8, 95%CI=1.8-8.0). Patients who had alcohol use disorder were also 3.2 times likely to have poor adherence compared to their counterparts (aOR=3.2, 95%CI=1.6-6.6). In addition, being educated (aOR =4.4, 95%CI=1.7-11.3), and being merchant (aOR=6.1, 95%CI=1.2-3.0) were associated with non-adherence to anti-TB medications.

1  
2  
3 **Conclusion:** Khat and alcohol use disorders predict greater likelihood of non-adherence to anti-  
4 TB medication. This implies the need to integrate the management for substance use disorders  
5 into the existing tuberculosis treatment services.  
6  
7  
8  
9

10  
11 **Keywords:** Substance use disorders, alcohol, khat, anti-TB adherence, non-adherence, Ethiopia.  
12  
13

### 14 **Strengths and limitations**

- 15  
16  
17 ➤ The strengths of this study are the prospective cohort design, longitudinal data collection,  
18 including patients from urban and rural health institutions, intensive training for data  
19 collectors, multi-center data collection, and use of standardized instruments.  
20  
21  
22  
23  
24  
25 ➤ Due to social desirability, patients might minimize reporting of the amount and frequency  
26 of the substances they were using.  
27  
28  
29  
30  
31 ➤ Measuring adherence based on pills count may not reflect the real adherence situation,  
32 since patients may not bring all leftover medications during the follow up.  
33  
34  
35  
36 ➤ Follow up and data collections have been carried out by health professionals working in  
37 the respective TB clinic. As a result, their assessment of adherence might be biased.  
38  
39  
40  
41 ➤ Hospitalized patients, patients on re-treatment, and patients with MDR-TB were not  
42 included in this study, and this may limit the generalizability of the result for these  
43 patients.  
44  
45  
46  
47  
48  
49  
50  
51  
52  
53  
54  
55  
56  
57  
58  
59  
60

## Introduction

Tuberculosis (TB) is a preventable and treatable disease but it remains one of the major diseases leading to death worldwide (1, 2). World Health Organization (WHO) estimates that 1.6 million persons died of TB in 2017 (1); almost 20% of them were HIV positive (1). The number of TB patients is estimated at about 10 million with an annual incidence of 6.4%. TB remains the main reason for premature mortality among HIV positive patients (1).

TB is most prevalent in middle and low-income countries. This exerts enormous pressure on societies as TB mainly affects mostly adults in the economically productive age groups (1, 3, 4). In fact, 87% of cases worldwide are from Asia, Africa, and the Russian Federation (1, 5). Tuberculosis related morbidity and mortality also remain high in low and middle-income countries. Because these countries have poor nutrition, unfavorable housing conditions, and unstable health care (1). Notably, 117,705 new cases were registered in 2017 in Ethiopia, corresponding to an annual incidence of 164 per 100,000 habitants (1). Ethiopia remains one of the top 22 countries having the highest TB mortality with an estimated mortality rate of 24 per 100,000 inhabitants in 2017 (1).

Long-term adherence to standardized medication is the key to successful treatment of TB as non-adherence may lead to the emergence of multidrug-resistant TB (MDR-TB), an increasing global health threat (1, 6, 7). Non-adherence to anti-TB medication could also lead to a lower treatment success rate (8, 9), default, and death (10, 11). Thus, Ethiopia has developed a national TB treatment guideline to ensure adherence through regular appointments and supervised drug administration, and to reduce poor treatment outcomes (12).

1  
2  
3 In Ethiopia, the prevalence of non-adherence among TB patients has been estimated to range  
4 from 10% in Amhara region to 24% in Southern Nations and Nationalities of Ethiopia (13). To  
5  
6 counteract this, the Ethiopian has implemented Direct Observed Treatment (DOT) services in  
7  
8 almost all health institutions (12), but its impact on medication adherence is unclear and the  
9  
10 reasons for non-adherence are still poorly understood.  
11  
12  
13

14  
15 Among the reasons for non-adherence, substance use disorders have been found to play a  
16  
17 dominant role (8, 14-16). Substances such as alcohol, tobacco, khat, and illicit drugs are  
18  
19 commonly used among patients with TB (17-19). Patients with TB are also at risk of increased  
20  
21 morbidity, and premature mortality due to substance use disorders (20). Because, substance use  
22  
23 disorders such as alcohol and tobacco are associated with MDR-TB (21, 22).  
24  
25  
26

27  
28 Khat is a natural stimulant with over 40 active compounds. Among these, psychoactive alkaloids,  
29  
30 cathinone, and cathine cause the stimulating effect, and lead to craving and dependency (23-26).  
31  
32 There is evidence that khat use increases susceptibility to tuberculosis (27-31), and maybe  
33  
34 associated with poor TB treatment outcomes (14, 32), prolonged duration of treatment (33), and  
35  
36 high load of bacteria in TB patients (34). In Yemen, khat use has been shown to be associated  
37  
38 with non-adherence to anti-tuberculosis medications (35), probably because khat disrupts  
39  
40 patients' sleep patterns and causes them to miss their appointments (35, 36). Ethiopia, like  
41  
42 Yemen, counts among the few countries where khat use is legal. Khat use disorder may be an  
43  
44 important but unrecognized threat to anti-TB medication adherence. Filling the information gaps  
45  
46 about the effect of substance use disorders will help to improve TB treatment outcomes and  
47  
48 inform decision makers about the need for an integration of substance use disorder treatment in  
49  
50 TB control programs in the future. Therefore, the objective of this study is to assess the effect of  
51  
52 substance use disorders (including khat and alcohol) on adherence to anti-TB medications in  
53  
54  
55  
56  
57

1  
2  
3 Southwest Ethiopia. Specifically, we examined the association of the most frequently used  
4 substances, namely khat and/or alcohol, on adherence to guideline compatible TB treatment.  
5  
6  
7

## 8 **Methods**

### 9 **Study area, period, and patients**

10  
11  
12 We conducted a prospective cohort study in Jimma zone and Jimma city special zone. Jimma  
13 city special zone is the capital city of Jimma zone and located in the Southwestern part of  
14 Ethiopia, 352 km from Addis Ababa, the capital of the country. The city has a tertiary hospital  
15 and a zonal hospital, as well as four functional health centers those currently providing services.  
16  
17 Similarly, Jimma Zone has 18 districts and located in the Southwest of Ethiopia. Overall, the  
18 zone has more than three million inhabitants. During the period of this study, Jimma Zone had  
19 112 health centers and three hospitals. Out of these government's public health facilities, 91  
20 health centers and all hospitals were providing services to TB patients. In this study, data was  
21 collected from a total of 26 health institutions (22 health centers and four hospitals). From Jimma  
22 city, we randomly selected 2 health centers and one hospital. We also randomly selected 20  
23 health centers and three hospitals from the Jimma Zone. Patients were included if they had  
24 initiated anti-TB treatment within a month of start of the study at the selected health centers and  
25 hospitals between October 2017 and October 2018. Patients were recruited over the first six  
26 months.  
27  
28  
29  
30  
31  
32  
33  
34  
35  
36  
37  
38  
39  
40  
41  
42  
43  
44  
45  
46  
47

### 48 **Study design**

49  
50  
51 This study is a multicenter prospective cohort study. We did not pair exposed and non-exposed  
52 patients by a certain character. Patients recruited to the cohort were interviewed on three  
53  
54  
55  
56  
57  
58  
59  
60

1  
2  
3 occasions, namely, baseline (starting treatment), first follow up (after 2 months), and second  
4  
5 follow up (at the end of six months).  
6  
7

### 8 **Sample size assumption and sampling procedure**

9

10  
11 The prevalence of non-adherence among TB patients who also used khat from previous studies  
12 was 62.4% (35). The prevalence of non-adherence among non khat user TB patients was 43.6%  
13 (35). We have included 111 exposed (with substance use) and 111 unexposed (without  
14 substance use) individuals to detect a difference of non-adherence to anti-TB medication at an  
15 alpha level of 0.05 and with a power of 80% using the corrected Fleiss sample size calculation  
16 [EPInfo™] (37). The total sample size was calculated considering a 20% of drop out rate and the  
17 final sample size was 134 in each group which totals 268 TB patients. New TB patients who  
18 were 18 years or older were recruited to participate in the study. Patients who had been on  
19 treatment for more than one month, patients on re-treatment, and MDR-TB cases were not  
20 included in the study.  
21  
22  
23  
24  
25  
26  
27  
28  
29  
30  
31  
32  
33  
34

### 35 **Instruments**

36

#### 37 **Exposure variables**

38  
39  
40  
41

42 In this study, the exposure variable is substance use disorder which includes khat and/or alcohol  
43 use disorder.  
44  
45

46  
47 *Substance use disorder:* In this study substance use disorder was defined as having khat and/or  
48 alcohol use disorder. Data on tobacco, shisha, and cannabis use were collected for explorative  
49 data analysis.  
50  
51  
52  
53  
54  
55  
56  
57



1  
2  
3 *Alcohol use disorders (AUDs)*:-Alcohol use disorder identification test (AUDIT) was used to  
4 collect data on AUDs (38). The AUDIT was evaluated over a period of two decades, and  
5 provides an accurate measure of risk of AUDs across gender, age, and cultures. With a cut-off  
6 score of eight or more, the sensitivity, and specificity of AUDIT for AUDs was 0·90 and 0·80,  
7 respectively (39). AUDIT was used in Ethiopian context and questions number two and three  
8 regarding standard drinks were adapted to a more locally appropriate question (40).  
9

10  
11  
12  
13  
14  
15  
16  
17  
18 *Nicotine dependence*: The Fagerstrom test for nicotine dependence (FTND) was used to assess  
19 tobacco dependence. A total score of FTND  $\geq 5$  was considered as tobacco dependence (41). At  
20 a cut-off score  $\geq 5$ , the FTND has good sensitivity (0·75), and specificity (0·80). The FTND has  
21 six items, with a total score ranging from 0-10 to measure nicotine dependence. A total FTND  
22 score of five indicates moderate nicotine dependence, a score of 6-7 indicates high nicotine  
23 dependence, and a score of 8-10 indicates very high nicotine dependence. Patients were also  
24 asked about their reasons for smoking tobacco (41).  
25  
26  
27  
28  
29  
30  
31  
32

33  
34  
35 *Cannabis and shisha use*: Use of both substances and their frequency were assessed.  
36  
37

38 *Khat use*: - Khat use was assessed by self-reported questionnaire. Since there is no standardized  
39 questionnaire for khat use, patterns, and reasons of khat use were assessed by using a structured  
40 questionnaire which was developed in the context of a literature review. Any consumption of  
41 khat in the last one month was considered as current khat use. Frequent khat use (using khat  
42 daily and 2-3 times per week) and using more than one bundle of khat per day was considered as  
43 khat use disorder.  
44  
45  
46  
47  
48  
49  
50  
51  
52  
53  
54  
55  
56  
57  
58  
59  
60

## Outcome variable

*Adherence:* Adherence status of tuberculosis patients was assessed by Direct Observed Treatment (DOT) (based on missing appointments) and pills counts. In this study, adherence is defined as taking medication regularly and attending follow-up according to appointments and national guideline for tuberculosis in Ethiopia (12). In this study, non-adherence is defined as missing at least one follow-up appointment during DOT. Non-adherence during intensive phase is defined as missing at least one dose of the prescribed anti-TB medication and noted separately. Adherence was assessed at baseline (beginning of intensive phase), at second month (end of intensive phase), and at end of 6 month (end of continuation phase).

## Explanatory variables

*Socio-demographic variables:* Age, sex, marital status, level of education, religion, ethnicity, income, household size, occupation, place of residence, and living conditions were assessed using a structured questionnaire. Income was categorized considering that the minimum monthly wage for employees of governmental organization in Ethiopia of 1,214 Ethiopian birr (36.67 Euros) (42). Then the monthly income of each patient was multiplied by 12 months to obtain the annual income, and we used a cutoff 14,568 Ethiopian birr (439.98 Euros).

*Disease related factors:* Types of TB diagnosis (smear positive, smear negative, extrapulmonary TB, and MDR-TB) were collected from patients' charts.

*Comorbidities:* All confirmed diagnoses of HIV, previous mental illness, hypertension, and diabetes mellitus were collected from patients' charts.

1  
2  
3 *Social support:* Oslo Social Support Scale (The Oslo 3-items) was used to collect data on the  
4 strength of social support. The Oslo-3 total score 3-8 indicate poor social support, 9-11 indicate  
5 moderate social support, and 12-14 indicate strong social support (43). The scale had been  
6 validated in Ethiopia among patients with tuberculosis (44). Social support was assessed at  
7 baseline, second month (at first follow up), and six month (at the completion of anti-TB  
8 treatment or second follow up).  
9

10  
11  
12 *Food insecurity:* It was assessed using the Household Food Insecurity Access Scale (HFIAS) to  
13 determine whether the respondent has experienced any of the indicators of food insecurity in the  
14 previous month. Food secure if none of the items were endorsed on HFIAS, mild food insecurity  
15 if the respondent endorsed any of the items 1, 2, 3, and/or 4 but not the items 5 to 9, 'moderate  
16 food insecurity' if the respondent has endorsed items 5, and/or 6 but not the items 7 to 9, and  
17 'severe food insecurity' if the respondent has endorsed items 7, 8, and/or 9 (45). This tool had  
18 been validated in Ethiopia among people living with HIV (46, 47). Food insecurity assessed at  
19 baseline, second month (at first follow up), and six month (at the completion of anti-TB  
20 treatment or second follow up).  
21  
22  
23  
24  
25  
26  
27  
28  
29  
30  
31  
32  
33  
34  
35  
36  
37  
38

### 39 **Data collection procedures**

40  
41  
42 Before starting data collection, the questionnaires were pretested on a sample (5% of the total  
43 sample) of patients with TB who were on treatment at Agaro health center. Those patients who  
44 participated in the pretest were not included in the main cohort study. Data were collected by  
45 trained health professionals working in the respective TB clinics. Data collectors were not blind  
46 to exposure status of the patients. Also, district tuberculosis focal persons and other health  
47  
48  
49  
50  
51  
52  
53  
54  
55  
56  
57  
58  
59  
60

professionals specifically trained for this purpose participated in the supervision of data collection.

### **Data analysis**

Data were entered to Epi Data (version 3.1) and analyzed using R studio (1.2.1335). Missing values of income were excluded from the analysis. Participants' characteristics and study variables were presented using descriptive statistics. Generalized linear model was used to examine the longitudinal effect of substance use disorders on medication adherence (binary outcome). We used an intercept only model to investigate the trajectory of adherence over time (model 0). Model 1 investigated the longitudinal effect of presence or absence of khat and alcohol use disorders on adherence without adjusting for covariates, model 2 investigated the longitudinal effect of khat and alcohol on adherence while adjusting for the full set of covariates. Model fit was examined with the Bayesian Information Criterion (BIC).

The covariate selection was based on a directed acyclic graph (DAG). DAGs are analytical method for visualizing hypotheses about causal relationships between exposure (substance use) and outcome (adherence) (48, 49). This approach has been shown to yield valid adjustment sets of variables and to avoid bias (50).

### **Ethical considerations**

Ethical clearance was obtained from the Ethical Review Board of Jimma University (IHRPGC1095/2017) and LMU (Nr: 18-017). The study was discussed in detail and written informed consent was obtained from each participant. The anonymity of the study participants was kept at all stages of data processing and write-up of the manuscript. Patients who had

alcohol and khat use disorder were advised to contact a mental health professional for further evaluation and treatment.

### Patient and public involvement

Patients were not involved in development of the research questions, study design, interpretation of results or writing of the manuscript.

## Results

### Socio-demographic characteristics

A total of 268 newly diagnosed patients (50% with substance use disorders, mean age 32.4, SD 14.4, 60.1% male) with tuberculosis were recruited. Of all patients, 10.8% (n=29), and 39.2% (n= 105) had alcohol and khat use disorders, respectively. No participant had tobacco, shisha, or cannabis use disorders. Age range was 18-80 years with 35% under 25 years (Refer to table 1). There were 22 missing data of annual income which we excluded from the analysis.

**Table1: Socio-demographic characteristics and substance use disorder among a cohort of patients on anti-tuberculosis treatment in Southwest Ethiopia, 2017/18 (n=268).**

| Variables |        | Total (%) | Substance use disorder |                          |                                    |
|-----------|--------|-----------|------------------------|--------------------------|------------------------------------|
|           |        |           | Baseline<br>N (%)      | First follow-up<br>N (%) | 2 <sup>nd</sup> follow up<br>N (%) |
| Gender    | Female | 39.9      | 40(37.4)               | 35(32.7)                 | 45(42.1)                           |
|           | Male   | 60.1      | 94(58.4)               | 80(49.7)                 | 84(52.2)                           |

|                       |                     |      |           |          |           |
|-----------------------|---------------------|------|-----------|----------|-----------|
| Age                   | 18-24               | 34.7 | 42(45.2)  | 31(33.3) | 38(40.9)  |
|                       | 25-34               | 32.5 | 35(40.2)  | 34(39.1) | 35(40.2)  |
|                       | 35-44               | 13.4 | 23(63.9)  | 20(55.6) | 22(61.1)  |
|                       | 45-54               | 10.1 | 17(63.0)  | 16(59.3) | 18(66.7)  |
|                       | 55-64               | 9.3  | 17(68.0)  | 14(56.0) | 16(64.0)  |
| Occupation            | Merchant            | 10.8 | 23(79.3)  | 19(65.5) | 20(69.0)  |
|                       | Farmer              | 34.3 | 57(62.0)  | 51(55.4) | 57(62.0)  |
|                       | Government employee | 39.2 | 37(35.2)  | 29(27.6) | 33(31.4)  |
|                       | Daily laborer       | 15.7 | 17(40.5)  | 16(38.1) | 19(45.2)  |
| Education             | No formal education | 63.1 | 68(40.2)  | 59(34.9) | 62(36.7)  |
|                       | Literate            | 36.9 | 66(66.7)  | 56(56.6) | 67(67.7)  |
| Annual income in Birr | <14568              | 76.9 | 108(52.4) | 92(44.7) | 104(50.5) |
|                       | ≥14568              | 14.9 | 16(40.0)  | 17(42.5) | 18(45.0)  |
| Marital               | Single              | 36.2 | 85(54.1)  | 76(48.4) | 87(55.4)  |
|                       | Married             | 58.6 | 39(40.2)  | 32(33.0) | 34(35.1)  |
|                       | Divorced/widowed    | 5.2  | 10(71.4)  | 7(50.0)  | 8(57.1)   |
| Religion              | Orthodox            | 30.6 | 43(52.4)  | 27(32.9) | 43(52.4)  |
|                       | Muslim              | 61.6 | 89(53.9)  | 86(52.1) | 82(49.7)  |
|                       | Protestant/others   | 7.8  | 2(9.5)    | 2(9.5)   | 4(19.0)   |
| Ethnicity             | Amhara              | 22.0 | 27(45.8)  | 17(28.8) | 29(49.2)  |
|                       | Oromo               | 61.6 | 83(50.3)  | 82(49.7) | 79(47.9)  |
|                       | Tigre/Gurage        | 16.4 | 24(54.5)  | 16(36.4) | 21(47.7)  |
| Family size           | Less than five      | 67.5 | 89(49.2)  | 76(42.0) | 89(49.2)  |
|                       | Five or greater     | 32.5 | 45(51.7)  | 39(44.8) | 40(46.0)  |
| Residence             | Rural               | 47.4 | 72(56.7)  | 59(46.5) | 68(53.5)  |

|                      |                 |      |          |          |          |
|----------------------|-----------------|------|----------|----------|----------|
|                      | Urban           | 52.6 | 62(44.0) | 56(39.7) | 61(43.3) |
| Type of tuberculosis | Smear positive, | 40.3 | 54(50.0) | 43(39.8) | 46(42.6) |
|                      | Smear negative  | 32.5 | 43(49.4) | 39(44.8) | 46(52.9) |
|                      | Extra pulmonary | 27.2 | 37(50.7) | 33(45.2) | 37(50.7) |

### Clinical characteristics and non-adherence

Out of all patients, 40.3 % (n=108), 32.5 % (n=87), and 27.2 % (n=73) were diagnosed with smear positive, smear negative, and extra pulmonary TB respectively. At baseline, 3.7% (n=10) patients were diagnosed with HIV, and 7.1% (n=19) with other comorbidities. At baseline 9.7 % (n=26) were non-adherent to TB medication. At two and six months of assessment, 26.1% (n=70) and 27.6% (n=74) missed at least one dose of their medications respectively. .

The prevalence of non-adherence among patients with substance use disorder was 16.4% (n=22), 41.7 % (n=48), and 45.7% (n=59) at baseline, first, and second follow up respectively (See table 2).

**Table 2: Various characteristics by adherence to anti-TB medications at the three time point assessments among patients with tuberculosis in Southwest Ethiopia 2017/18 (n=268)**

| Variables              |     | Adherence to anti-TB at baseline |                       | Adherence to anti-TB at first follow-up |                       | Adherence to anti-TB at second follow-up |                       |
|------------------------|-----|----------------------------------|-----------------------|-----------------------------------------|-----------------------|------------------------------------------|-----------------------|
|                        |     | Adherent<br>N (%)                | Non-adherent<br>N (%) | Adherent<br>N (%)                       | Non-adherent<br>N (%) | Adherent<br>N (%)                        | Non-adherent<br>N (%) |
| Substance use disorder | No  | 130(97.0)                        | 4(3.0)                | 131(85.6)                               | 22(14.4)              | 124(89.2)                                | 15(10.8)              |
|                        | Yes | 112(83.6)                        | 22(16.4)              | 67(58.3)                                | 48(41.7)              | 70(54.3)                                 | 59(45.7)              |

|                       |                     |           |          |           |          |           |          |
|-----------------------|---------------------|-----------|----------|-----------|----------|-----------|----------|
| Gender                | Male                | 143(88.8) | 18(11.2) | 112(69.6) | 49(30.4) | 83(77.6)  | 24(22.4) |
|                       | Female              | 99(92.5)  | 8(7.5)   | 86(80.4)  | 21(19.6) | 111(68.9) | 50(31.1) |
| Age                   | 18-24               | 88(94.6)  | 5(5.4)   | 72(77.3)  | 21(22.7) | 69(74.2)  | 24(25.8) |
|                       | 25-34               | 79(90.8)  | 8(9.2)   | 64(73.7)  | 23(26.3) | 67(77.0)  | 20(23.0) |
|                       | 35-44               | 28(77.8)  | 8(22.2)  | 24(66.7)  | 12(33.3) | 23(63.9)  | 13(36.1) |
|                       | 45-54               | 24(88.9)  | 3(11.1)  | 21(77.8)  | 6(22.2)  | 19(70.4)  | 8(29.6)  |
|                       | 55-64               | 23(92.0)  | 2(8.0)   | 17(68.0)  | 8(32.0)  | 16(64.0)  | 9(36.0)  |
| Occupation            | Merchant            | 22(75.9)  | 7(24.1)  | 17(58.6)  | 12(41.4) | 14(48.3)  | 15(51.7) |
|                       | Farmer              | 79(85.9)  | 23(14.1) | 66(71.7)  | 26(28.3) | 64(69.6)  | 28(30.4) |
|                       | Government Employee | 21(95.5)  | 1(4.5)   | 79(75.2)  | 26(24.8) | 82(78.1)  | 23(21.9) |
|                       | Daily laborer       | 41(97.6)  | 1(2.4)   | 36(85.0)  | 6(14.3)  | 34(81.0)  | 8(19.0)  |
| Education             | No formal education | 165(97.6) | 4(2.4)   | 145(85.8) | 24(14.2) | 139(82.2) | 30(17.8) |
|                       | Literate            | 77(77.8)  | 22(22.2) | 53(53.5)  | 46(46.5) | 55(55.6)  | 44(44.4) |
|                       | Tertiary            | 20(71.4)  | 8(28.6)  | 8(28.6)   | 20(71.4) | 10(35.7)  | 18(64.3) |
| Annual income in Birr | <14568              | 185(89.8) | 21(10.2) | 154(74.8) | 52(25.2) | 149(72.3) | 57(27.7) |
|                       | ≥14568              | 37(92.5)  | 3(7.5)   | 30(75.0)  | 10(25.0) | 31(77.5)  | 9(22.5)  |
| Food insecurity       | No                  | 129(94.9) | 7(5.1)   | 105(72.4) | 40(27.6) | 118(72.8) | 44(27.2) |
|                       | Middle/moderate     | 46(80.7)  | 11(19.3) | 29(70.0)  | 12(29.3) | 26(60.5)  | 17(39.5) |
|                       | Severe              | 67(89.3)  | 8(10.7)  | 64(78.0)  | 18(22.0) | 50(79.4)  | 13(20.6) |
| Marital status        | Single              | 92(94.8)  | 5(5.2)   | 109(69.4) | 48(30.6) | 80(82.5)  | 17(17.5) |
|                       | Married             | 140(89.2) | 17(10.8) | 80(85.8)  | 17(17.2) | 104(66.2) | 53(33.8) |
|                       | Divorced/widowed    | 10(71.4)  | 4(28.6)  | 9(64.6)   | 5(37.4)  | 10(71.4)  | 4(28.6)  |



|                |                       |           |          |           |          |           |          |
|----------------|-----------------------|-----------|----------|-----------|----------|-----------|----------|
| Religion       | Orthodox              | 74(90·2)  | 8(9·8)   | 63(76·8)  | 19(23·2) | 61(74·4)  | 21(25·6) |
|                | Muslim                | 147(89·7) | 18(10·3) | 118(71·5) | 47(28·5) | 114(69·1) | 51(39·9) |
|                | Protestant and others | 20(95·2)  | 1(4·8)   | 17(81·0)  | 4(19·0)  | 19(90·5)  | 2(9·5)   |
| Ethnicity      | Amhara                | 53(89·8)  | 6(10·2)  | 49(83·1)  | 10(16·9) | 48(81·4)  | 11(18·6) |
|                | Oromo                 | 160(90·9) | 16(9·1)  | 119(72·1) | 46(27·9) | 119(72·1) | 46(27·9) |
|                | Tigre/Gurage          | 29(87·9)  | 4(12·1)  | 30(68·2)  | 14(31·8) | 27(61·4)  | 17(38·6) |
| Family size    | Less than five        | 165(91·2) | 16(8·8)  | 132(72·9) | 49(27·1) | 137(75·7) | 44(24·3) |
|                | Five or greater       | 77(88·5)  | 10(11·5) | 66(75·9)  | 21(24·1) | 57(64·5)  | 30(34·5) |
| Residence      | Rural                 | 113(89·0) | 14(11·0) | 94(74·0)  | 33(26·0) | 93(73·2)  | 34(26·8) |
|                | Urban                 | 129(91·5) | 12(8·5)  | 104(73·0) | 37(26·2) | 101(71·6) | 40(28·4) |
| Type of TB     | Smear positive        | 95(91·9)  | 13(8·1)  | 80(74·1)  | 28(25·9) | 78(72·2)  | 30(27·8) |
|                | Smear negative        | 81(9·1)   | 6(6·9)   | 66(75·9)  | 21(24·1) | 64(73·6)  | 23(26·4) |
|                | Extra pulmonary       | 66(90·4)  | 7(9·6)   | 52(71·2)  | 21(28·8) | 52(71·2)  | 21(28·8) |
| HIV            | Seronegative          | 233(90·3) | 25(9·7)  | 190(74·2) | 66(25·8) | 183(73·5) | 66(26·5) |
|                | Seropositive          | 9(90·0)   | 1(10·0)  | 8(66·7)   | 4(33·3)  | 11(57·9)  | 8(42·1)  |
| Social support | Poor                  | 83(89·2)  | 10(10·8) | 83(74·8)  | 28(25·2) | 96(68·6)  | 44(34·1) |
|                | Moderate              | 101(89·4) | 12(10·6) | 68(80·0)  | 17(20·0) | 58(78·4)  | 16(21·6) |
|                | Good                  | 58(93·5)  | 4(6·5)   | 47(65·3)  | 25(34·7) | 40(74·1)  | 14(25·9) |

### Effect of substance use disorder on the adherence to anti-TB medications

The intercept only model (model 0) showed a significant decrease in the percentage of adherence over time (BIC= 642.5). Adding alcohol and khat use disorders (model 1) improved model fit

(BIC=627.6): Patients with khat use disorder had a significantly higher probability of non-adherence over time (OR= 4.2, 95%CI=2.1-8.6). The odds of non-adherence among patients with alcohol use disorder (AUDs) was 3.3 times that of patients free of AUDs (OR=3.3, 95%CI=1.6-6.6). Adding covariates did not substantially change this association (OR= 2.8, 95%CI=2.0-3.8) and further improved model fit (BIC= 642.2). In the final model, khat use disorder (aOR= 3.8, 95%CI=1.8-8.0), or alcohol use disorder (aOR= 3.2, 95%CI=1.6-6.6), being educated (aOR=4.4, 95%CI=1.7-11.3), and being merchant (aOR=6.1, 95%CI= 1.2-30.8) were associated with decreasing adherence (See table 3). Patients with khat use disorder were 3.8 times more likely to be non-adherent to anti-TB medications than patients without khat use disorder. Also, participants whose occupation was merchant were 6.1 times more likely to be non-adherent to anti-TB medications compared to daily laborers.

**Table 3: Predictors of non-adherence to anti TB medications among patients with tuberculosis in Southwest Ethiopia 2017/2018 (n=268).**

| Variables |       | Model 0(Intercept only) |       | Model 1(khat and alcohol including age and gender) |         | Full model |         |
|-----------|-------|-------------------------|-------|----------------------------------------------------|---------|------------|---------|
|           |       | OR                      | 95%CI | OR                                                 | 95%CI   | aOR        | 95%CI   |
| Khat UD   | No    | Reference               |       |                                                    |         |            |         |
|           | Yes   | -                       | -     | 4.2                                                | 2.1-8.6 | 3.8        | 1.8-8.0 |
| AUDs      | No    | Reference               |       |                                                    |         |            |         |
|           | Yes   | -                       | -     | 3.3                                                | 1.6-6.6 | 3.2        | 1.6-6.6 |
| Age       | 18-24 | Reference               |       |                                                    |         |            |         |
|           | 25-34 | -                       | -     | 1.2                                                | 0.4-3.2 | -          | -       |
|           | 35-44 | -                       | -     | 1.8                                                | 0.5-6.4 | -          | -       |
|           | 45-54 | -                       | -     | 0.9                                                | 0.2-4.0 | -          | -       |
|           | ≥55   | -                       | -     | 1.2                                                | 0.3-5.1 | -          | -       |

|                |                         |           |         |       |         |     |          |
|----------------|-------------------------|-----------|---------|-------|---------|-----|----------|
| Gender         | Female                  | Reference |         |       |         |     |          |
|                | Male                    | -         | -       | 1·6   | 0·7-3·6 | -   | -        |
| Education      | No formal education     | Reference |         |       |         |     |          |
|                | Read and write/literate | -         | -       | -     | -       | 4·4 | 1·7-11·3 |
| Social support | Good                    | Reference |         |       |         |     |          |
|                | moderate                | -         | -       | -     | -       | 0·5 | 0·2-1·2  |
|                | Poor                    | -         | -       | -     | -       | 0·8 | 0·3-1·9  |
| Occupation     | Daily laborer           | Reference |         |       |         |     |          |
|                | Farmer                  | -         | -       | -     | -       | 2·1 | 0·5-8·0  |
|                | Government employee     | -         | -       | -     | -       | 2·1 | 0·6-8·0  |
|                | Merchant                | -         | -       | -     | -       | 6·1 | 1·2-30·8 |
| Time T2        |                         | 2·7       | 2·0-3·6 | 2·7   | 2·0-3·6 | 2·8 | 2·0-3·8  |
| BIC            |                         | 642·5     |         | 672·6 |         |     | 642·2    |

## Discussion

This study conducted in patients undergoing standardized treatment for tuberculosis in Southwest Ethiopia revealed three important findings: 1) adherence to medication decreased over the course of treatment; 2) substance use disorders, particularly khat and alcohol contributed to this non-adherence; and 3) this association was independent of other factors such as education, social support, and occupation.

It is alarming that adherence to TB medication decreased over the course of treatment, as already shown by studies done in South Ethiopia (51), Northwest Ethiopia (52), and Addis Ababa (53) Ethiopia. Possible reasons for non-compliance are distance from the health institution that dispenses medications (13, 51), lack of knowledge about tuberculosis (51, 52), psychological distress (53), being busy with work (52), and alcohol intake (52). To solve the problem related to

1  
2  
3 adherence, Ethiopian health authorities have reinforced their efforts to implement DOT programs  
4 throughout the whole treatment and all over the country starting from initiation to completion of  
5 treatment (12).  
6  
7  
8  
9

10  
11 In this study, the prevalence of non-adherence to anti-TB medication in the first month of  
12 treatment was 9.7 % which is in line with a systematic review that found 10.0% of non-  
13 adherence in the Amhara region (13, 54). The proportion of non-adherence to anti-TB  
14 medications during the first (26.1%) and second (27.6%) follow up was slightly higher than  
15 findings from South Ethiopia (24.5%) (51), Northwest Ethiopia (21.2%) (52), and Addis Ababa  
16 (19.5%) (53). This might be explained by the high proportion of persons with a substance use  
17 disorder in our study, in which we deliberately oversampled persons with SUD to maximize  
18 power. The discrepancy may be also due to patients in our study were using substances whereas  
19 in the systematic review there was no data regarding substance use.  
20  
21  
22  
23  
24  
25  
26  
27  
28  
29  
30  
31

32 In this study, the prevalence of non-adherence among patients with substance use disorder at  
33 baseline, first, and second follow up was 16.4%, 41.7%, and 45.7% respectively. This is in line  
34 with a study from the US (39%) (52, 55, 56).  
35  
36  
37  
38  
39

40 Moreover, this study provides the evidence that substance use disorders have a significant  
41 negative effect on adherence to anti-TB medications among patients with tuberculosis, which  
42 supports earlier findings from previous studies that found alcohol use disorder, tobacco  
43 dependence, and illicit drug use have a negative impact on adherence in Uzbekistan, Spain, and  
44 Morocco (57-59). This is also comparable with retrospective studies conducted in Russia and  
45 New York which found that alcohol use disorder and drug addiction were significantly  
46 associated with non-adherence to anti-TB medications (8, 9). Likewise, the finding of this study  
47  
48  
49  
50  
51  
52  
53  
54  
55  
56  
57  
58  
59  
60

1  
2  
3 is in line with studies conducted in different parts of Ethiopia which found khat, alcohol, and  
4 tobacco are the main factors for non-adherence to anti-TB medications (52, 56, 60). In our study,  
5 patients with substance use disorder were more than two times more likely not to follow their  
6 medication plan than patients without substance use disorders. This finding is in line with the  
7 finding of a study conducted in US that found the risk of missing a DOT appointment was 2.6  
8 times higher among patients with substance use disorder than in patients without drug  
9 consumption (55).

10  
11  
12 In our study, khat use disorder turned out to be the most stringent factor that decreased  
13 adherence. This confirms earlier findings from Yemen (61) and Ethiopia (14, 60). A plausible  
14 explanation is that khat chewing disrupts night sleep (62) causing patients to oversleep which  
15 may lead to missing of the DOT appointments at the health facility. Another reason may be that  
16 khat is common substance in Ethiopia, and therefore less attention is paid to its use. Since little is  
17 known about the effect of khat on patients with tuberculosis (14), it may be considered as part of  
18 a normal social interaction (61).

19  
20  
21 A higher level of education was associated with non-adherence to anti-TB medications in our  
22 study. This result confirms the findings from Yemen that found more educated patients were  
23 19% times less likely to be adherent to their medication (61). Also, a study from Ethiopia  
24 showed that attending primary education was associated with non-adherence to anti-TB  
25 medications (60). Our findings are contrary to previous studies which have suggested that lower  
26 or no formal education decreases adherence to TB medication (13, 63). Our finding seems  
27 counterintuitive. However, our results are likely to be related to findings from a study indicating  
28 that persons with higher educational attainment might be reluctant to accept DOTS regimes (64).  
29 Daily visits to the health facility have been reported as time consuming and probably  
30  
31  
32  
33  
34  
35  
36  
37  
38  
39  
40  
41  
42  
43  
44  
45  
46  
47  
48  
49  
50  
51  
52  
53  
54  
55  
56  
57  
58  
59  
60

1  
2  
3 stigmatizing for patients with a job (65). In this study, being merchant was associated with poor  
4 adherence to anti-TB medications. This might be due to patients miss their medications because  
5 of busy working schedule, but this needs further investigation.  
6  
7  
8  
9  
10  
11  
12  
13

### 14 **Limitations**

15  
16  
17 This study has some limitations. Due to social desirability, patients might minimize reporting of  
18 the amount and frequency of substance they were using. The tools used for alcohol and khat use  
19 disorder are not gold-standard diagnostic for the respective disorders. Also, measuring adherence  
20 based on pills count may not reflect the real adherence situation since some patients might not  
21 bring all leftover medications during the follow up. Likewise, follow up and data collections  
22 have been carried out by health professionals working in the respective TB clinics which might  
23 have biased their assessment of adherence. However, overestimating adherence may have biased  
24 our results towards a null effect and led to underestimating the effect of substance use disorders,  
25 so we are confident that our estimates are conservative. The participation of district tuberculosis  
26 focal persons and other health professionals in the supervision of data collection might have also  
27 introduced bias.  
28  
29  
30  
31  
32  
33  
34  
35  
36  
37  
38  
39  
40  
41  
42

43 Furthermore, hospitalized patients, patients on re-treatment, and patients with MDR-TB were not  
44 included in this study, so that the results cannot be generalized for these patients. However,  
45 MDR-TB patients are under special treatment and surveillance so that including this group of  
46 patients might have biased the results. Finally, we did not assess the reasons for non-adherence.  
47 This should be part of a separate study going more into the details of the situation of persons  
48 with khat and alcohol problems.  
49  
50  
51  
52  
53  
54  
55  
56  
57

## Strengths

The specific strengths of this study are the prospective cohort design, longitudinal data collection, including patients from urban and rural health institutions, intensive training given for data collectors, multi-center data collection, and the use of standardized instruments to assess exposure, outcomes, and explanatory variables.

## Conclusions

Substance use disorders predict greater likelihood of anti-TB medication non-adherence among TB patients. Also, khat and alcohol use disorders were the main risk factors for anti-TB medication adherence. This finding implies the importance of integrating substance use disorders screening and treatment into the existing tuberculosis services to reduce the effect of substances on treatment outcomes including adherence.

## Ethics approval and consent to participate

Ethical clearance was obtained from the ethical review committee of Jimma University, Institute of Health. Written informed consent was obtained from each participant before participation. Information obtained in due course was kept confidentially

## Consent for publication

Not applicable.

## Competing of interest

All authors declare that they have no conflict of interests.

## Funding

1  
2  
3 The study was funded by Jimma University Institute of Health with the grant number of  
4 IHRPGC 1095/2017, Institute of Psychiatric Phenomics and Genomics (IPPG) with the grant  
5 number of 15106202/2018, and individual throughout data collection. The funders had no role in  
6 this study including interpretation and preparation of the manuscript.  
7  
8  
9  
10  
11  
12

### 13 **Authors' contribution**

14  
15  
16 MS contributed to the conceptualization, design, statistical analysis, and manuscript preparation.  
17  
18 MT, KA, WK, ET, YY, RS, and EG contributed to the design, analysis, and review of the  
19 manuscript.  
20  
21  
22  
23

### 24 **Author affiliations**

25  
26  
27 <sup>1</sup> Department of Psychiatry, Medical Faculty, Jimma University, Jimma Ethiopia.

28  
29  
30 <sup>2</sup> Department of Psychiatry, St. Paul's Hospital Millennium Medical College, Addis Ababa, Ethiopia

31  
32  
33 <sup>3</sup> Department of Psychiatry and Psychotherapy, LMU Munich, Germany

34  
35  
36 <sup>4</sup> Institute of Psychiatric Phenomics and Genomics (IPPG), University Hospital, LMU Munich, Germany

37  
38  
39 <sup>5</sup> Department of Forensic Psychiatry, Isar Amper Klinikum, Munich, Germany

40  
41  
42 <sup>6</sup> Institute for Medical Information Processing, Biometrics and Epidemiology, LMU Munich, Munich, Germany

43  
44  
45 <sup>7</sup> Institute for Medical Information Processing, Biometrics and Epidemiology, LMU Munich, Munich, Germany

46  
47  
48 <sup>8</sup> Center for International Health, Ludwig Maxmillians University, Munich, Germany

### 49 **Acknowledgment**

50  
51  
52 We are grateful to the study participants for sacrificing their time to participate in the study. Our  
53 gratitude is extended to Jimma University for funding the project. We are also grateful to IPPG  
54  
55  
56



1  
2  
3 for funding part of the project. Our gratitude also extends to Dr. Michael Odenwald, who  
4 contributed money from his pocket to support the project.  
5  
6  
7

### 8 **Availability of data**

9  
10  
11 It will be available upon official request from interested individuals or organizations.  
12  
13

### 14 **References**

- 15  
16  
17  
18 1. Global tuberculosis report 2018. Geneva: World Health Organization; 2018. Licence: CC BY-  
19 NC-SA 3.0 IGO. [https://www.who.int/tb/publications/global\\_report/en/](https://www.who.int/tb/publications/global_report/en/) accessed on 24/07/2019  
20  
21  
22  
23 2. Grobusch MP, Kapata N. Global burden of tuberculosis: where we are and what to do. *Lancet*  
24 *Infect Dis.* 2018; 18(12):1291-3.  
25  
26  
27  
28  
29 3. Patel V, Chisholm D, Dua T, Laxminarayan R, Medina-Mora ME. Mental, Neurological, and  
30 Substance Use Disorders: Disease Control Priorities, Third Edition (Volume 4). Washington  
31 (DC): The International Bank for Reconstruction and Development / The World Bank, 2016.  
32  
33  
34  
35  
36  
37 4. Floyd K, Glaziou P, Zumla A, Raviglione M. The global tuberculosis epidemic and progress  
38 in care, prevention, and research: an overview in year 3 of the end TB era. *Lancet Respir Med.*  
39 2018; 6(4):299-314.  
40  
41  
42  
43  
44 5. Global tuberculosis report 2016, Geneva, World Health Organization; 2016.  
45  
46  
47 <https://apps.who.int/medicinedocs/en/d/Js23098en/> accessed on 24/07/2019.  
48  
49  
50  
51 6. Dodor EA. Tuberculosis treatment default at the communicable diseases unit of Effia-  
52 Nkwanta Regional Hospital: a 2-year experience. *Int J Tuberc Lung Dis.* 2004; 8(11):1337-41.  
53  
54  
55  
56  
57

- 1  
2  
3 7. Global tuberculosis report 2013. Geneva, World Health Organization; 2013.  
4  
5 <http://apps.who.int/medicinedocs/en/m/abstract/Js21534en/> accessed on 25/07/2019  
6  
7
- 8  
9 8. Gelmanova IY, Keshavjee S, Golubchikova VT, Berezina VI, Strelis AK, Yanova GV, et al.  
10 Barriers to successful tuberculosis treatment in Tomsk, Russian Federation: non-adherence,  
11 default and the acquisition of multidrug resistance. *Bulletin of the World Health Organization*.  
12 2007; 85(9):703-11.  
13  
14
- 15  
16  
17  
18 9. Mekonnen HS, Azagew AW. Non-adherence to anti-tuberculosis treatment, reasons and  
19 associated factors among TB patients attending at Gondar town health centers, Northwest  
20 Ethiopia. *BMC Res Notes*. 2018; 11: 691.  
21  
22  
23
- 24  
25  
26 10. Mohd Shariff N, Shah SA, Kamaludin F. Predictors of death among drug-resistant  
27 tuberculosis patients in Kuala Lumpur, Malaysia: A retrospective cohort study from 2009 to  
28 2013. *J Glob Antimicrob Resist*. 2016; 6:102-7.  
29  
30  
31
- 32  
33  
34 11. Waitt CJ, Squire SB. A systematic review of risk factors for death in adults during and  
35 after tuberculosis treatment. *Int J Tuberc Lung Dis*. 2011; 15(7):871-85.  
36  
37  
38
- 39  
40 12. Federal Democratic Republic of Ethiopia MoH. Guidelines for clinical and programmatic  
41 management of Tb, leprosy and Tb/HIV in Ethiopia fifth edition: MoH; 2012.  
42  
43  
44
- 45  
46 13. Zegeye A, Dessie G, Wagnew F, Gebrie A, Islam SMS, Tesfaye B, et al. Prevalence and  
47 determinants of anti-tuberculosis treatment non-adherence in Ethiopia: A systematic review and  
48 meta-analysis. *PLoS One*. 2019; 14(1):e0210422.  
49  
50  
51  
52  
53  
54  
55  
56  
57

- 1  
2  
3 14. Ambaw F, Mayston R, Hanlon C, Medhin G, Alem A. Untreated depression and  
4 tuberculosis treatment outcomes, quality of life and disability, Ethiopia. *Bulletin of the World*  
5  
6 *Health Organization*. 2018; 96(4):243-55.  
7  
8  
9
- 10  
11 15. Pelissari DM, Diaz-Quijano FA. Impact of alcohol disorder and the use of illicit drugs on  
12 tuberculosis treatment outcomes: a retrospective cohort study. *Arch Public Health*. 2018; 76:45.  
13  
14  
15
- 16 16. Silva MR, Pereira JC, Costa RR, Dias JA, Guimaraes MDC, Leite ICG. Drug addiction  
17 and alcoholism as predictors for tuberculosis treatment default in Brazil: a prospective cohort  
18 study. *Epidemiol Infect*. 2017; 145(16):3516-24.  
19  
20  
21  
22  
23
- 24 17. Deiss RG, Rodwell TC, Garfein RS. Tuberculosis and illicit drug use: review and update.  
25 *Clin Infect Dis*. 2009 ;48(1):72-82.  
26  
27  
28
- 29 18. Oeltmann JE, Kammerer JS, Pevzner ES, Moonan PK. Tuberculosis and substance abuse in  
30 the United States, 1997-2006. *Arch Intern Med*. 2009. 26;169(2):189-97  
31  
32  
33  
34
- 35 19. O'Connell R, Chishinga N, Kinyanda E, Patel V, Ayles H, Weiss HA, et al. Prevalence  
36 and correlates of alcohol dependence disorder among TB and HIV infected patients in Zambia.  
37 *PloS one*. 2013; 8(9):e74406.  
38  
39  
40  
41  
42
- 43 20. Christensen AS, Roed C, Andersen PH, Andersen AB, Obel N. Long-term mortality in  
44 patients with pulmonary and extrapulmonary tuberculosis: a Danish nationwide cohort study.  
45 *Clinical epidemiology*. 2014; 6:405-21.  
46  
47  
48  
49
- 50 21. Fleming MF, Krupitsky E, Tsoy M, Zvartau E, Brazhenko N, Jakubowiak W, et al.  
51 Alcohol and drug use disorders, HIV status and drug resistance in a sample of Russian TB  
52  
53  
54  
55  
56  
57

1  
2  
3 patients. The international journal of tuberculosis and lung disease: the official journal of the  
4  
5 International Union against Tuberculosis and Lung Disease. 2006; 10(5):565-70.  
6  
7

8  
9 22. Skrahina A, Hurevich H, Zalutskaya A, Sahalchyk E, Astrauko A, Hoffner S, et al.  
10  
11 Multidrug-resistant tuberculosis in Belarus: the size of the problem and associated risk factors.  
12  
13 Bulletin of the World Health Organization. 2013; 91(1):36-45.  
14  
15

16  
17 23. Luqman W, Danowski TS. The use of khat (*Catha edulis*) in Yemen. Social and medical  
18  
19 observations. *Ann Intern Med.* 1976;85(2):246-9.  
20  
21

22  
23 24. Gebissa E. Khat in the Horn of Africa: historical perspectives and current trends. *J*  
24  
25 *Ethnopharmacol.* 2010; 132(3):607-14.  
26  
27

28  
29 25. Dhaifalah I, Santavy J. Khat habit and its health effect. A natural amphetamine. *Biomed*  
30  
31 *Pap Med Fac Univ Palacky Olomouc Czech Repub.* 2004; 148(1):11-5.  
32  
33

34  
35 26. Alfaifi H, Abdelwahab SI, Mohan S, Elhassan Taha MM, Syame SM, Shaala LA, et al.  
36  
37 *Catha edulis* Forsk. (Khat): Evaluation of its Antidepressant-like Activity. *Pharmacognosy*  
38  
39 *magazine.* 2017; 13(Suppl 2):S354-s8.  
40  
41

42  
43 27. Wolde D, Tadesse M, Abdella K, Abebe G, Ali S. Tuberculosis among Jimma University  
44  
45 Undergraduate Students: First Insight about the Burden of Tuberculosis in Ethiopia Universities-  
46  
47 Cross-Sectional Study. *Int J Bacteriol.* 2017;9840670.  
48  
49

50  
51 28. Alemu YM, Awoke W, Wilder-Smith A. Determinants for tuberculosis in HIV-infected  
52  
53 adults in Northwest Ethiopia: a multicentre case-control study. *BMJ Open.* 2016; 6(4):e009058.  
54  
55

56  
57 29. Jaber AA, Khan AH, Sulaiman SA, Ahmad N. Role of socio-demographical factors on  
58  
59 tuberculosis outcome in Yemen. *International journal of mycobacteriology.* 2016; 5(1):S20.  
60

- 1  
2  
3 30. Legesse M, Ameni G, Mamo G, Medhin G, Shawel D, Bjune G, et al. Knowledge and  
4 perception of pulmonary tuberculosis in pastoral communities in the middle and Lower Awash  
5 Valley of Afar region, Ethiopia. *BMC Public Health*. 2010; 10:187.  
6  
7  
8  
9  
10  
11 31. Alvi A, Rizwan M, Sunosi RA, Bin Ali Jerah A. Does khat chewing increases the risk of  
12 *Mycobacterium tuberculosis* infection by macrophage immune modulation? *Med Hypotheses*.  
13 2014; 82(6):667-9.  
14  
15  
16  
17  
18 32. Jaber AA, Khan AH, Syed Sulaiman SA, Ahmad N, Anaam MS. Evaluation of Health-  
19 Related Quality of Life among Tuberculosis Patients in Two Cities in Yemen. *PLoS One*. 2016;  
20 11(6):e0156258.  
21  
22  
23  
24  
25  
26 33. Jaber AAS, Khan AH, Sulaiman SAS. Evaluating treatment outcomes and durations  
27 among cases of smear-positive pulmonary tuberculosis in Yemen: a prospective follow-up study.  
28 *J Pharm Policy Pract*. 2017; 10:36.  
29  
30  
31  
32  
33  
34 34. Alvi A, Fatima N, Jerah AA, Rizwan M, Hobani YH, Sunosi RA, et al. Correlation  
35 between Resistin, Tuberculosis and Khat Addiction: A Study from South Western Province of  
36 Saudi Arabia. *PLoS One*. 2015; 10(10):e0140245.  
37  
38  
39  
40  
41  
42 35. Anaam MS I, Al Serouri AW, Aldobhani A. Factors affecting patients' compliance to  
43 anti-tuberculosis treatment in Yemen: *JPHSR*; 2013.  
44  
45  
46  
47 36. Cox G, Rampes H. Adverse effects of khat: a review. *Advances in Psychiatric Treatment*.  
48 2018; 9(6):456-63.  
49  
50  
51  
52 37. EPIInfoTM. <http://apps.who.int/medicinedocs/en/m/abstract/Js21534en/> accessed on  
53 19/08/2019  
54  
55  
56  
57  
58  
59  
60

1  
2  
3 38. Babor TF, Higgins-Biddle JC, Saunders JB, Monteiro MG. The Alcohol Use Disorders  
4 Identification Test Guidelines for Use in Primary Care. World Health Organization. 2001.

5  
6  
7  
8 [https://apps.who.int/iris/bitstream/handle/10665/67205/WHO\\_MSD\\_MSB\\_01.6a.pdf;jsessionid=](https://apps.who.int/iris/bitstream/handle/10665/67205/WHO_MSD_MSB_01.6a.pdf;jsessionid=B5D5F8F1F1B82FE622D04E8F02635F05?sequence=1)  
9 [B5D5F8F1F1B82FE622D04E8F02635F05?sequence=1](https://apps.who.int/iris/bitstream/handle/10665/67205/WHO_MSD_MSB_01.6a.pdf;jsessionid=B5D5F8F1F1B82FE622D04E8F02635F05?sequence=1) accessed on 20/07/2019.

10  
11  
12  
13  
14 39. Babor TF, Higgins-Biddle JC, Saunders JB, Monteiro MG. The Alcohol Use Disorders  
15 Identification Test Guidelines for Use in Primary Care. World Health Organization. 2001.

16  
17  
18  
19 40. Soboka M, Tesfaye M, Feyissa GT, Hanlon C. Alcohol use disorders and associated  
20 factors among people living with HIV who are attending services in south west Ethiopia. BMC  
21 research notes. 2014; 7:828.

22  
23  
24  
25  
26  
27 41. Mikami I, Akechi T, Kugaya A, Okuyama T, Nakano T, Okamura H, et al. Screening for  
28 nicotine dependence among smoking-related cancer patients. Japanese journal of cancer research  
29 : Gann. 1999; 90(10):1071-5.

30  
31  
32  
33  
34  
35 42. Average Salary in Ethiopia. [http://www.salaryexplorer.com/salary-](http://www.salaryexplorer.com/salary-survey.php?loc=69&loctype=1)  
36 [survey.php?loc=69&loctype=1](http://www.salaryexplorer.com/salary-survey.php?loc=69&loctype=1) accessed on 09/07/2019.

37  
38  
39  
40 43. Instrument Manual: Oslo-3 Social Support Scale (OSS-3)2006.  
41 [https://circabc.europa.eu/webdav/CircaBC/ESTAT/healthtf/Library/ehis\\_wave\\_2/methodology\\_e](https://circabc.europa.eu/webdav/CircaBC/ESTAT/healthtf/Library/ehis_wave_2/methodology_ehis/development/instruments/Manual_OSS_3.pdf)  
42 [his/development/instruments/Manual\\_OSS\\_3.pdf](https://circabc.europa.eu/webdav/CircaBC/ESTAT/healthtf/Library/ehis_wave_2/methodology_ehis/development/instruments/Manual_OSS_3.pdf) , Accessed on 08/06/2019

43  
44  
45  
46  
47  
48 44. Duko B, Gebeyehu A, Ayano G. Prevalence and correlates of depression and anxiety  
49 among patients with tuberculosis at WolaitaSodo University Hospital and Sodo Health Center,  
50 WolaitaSodo, South Ethiopia, Cross sectional study. BMC psychiatry. 2015; 15:214.

- 1  
2  
3 45. Coates J SA, Bilinsky P. Household Food Insecurity Access Scale (HFIAS) for  
4 measurement of food access: Indicator guide (V.3): Washington, D.C.: FHI 360/FANTA; 2007.  
5  
6  
7  
8 [http://www.fao.org/fileadmin/user\\_upload/eufao-fsi4dm/doc-training/hfias.pdf](http://www.fao.org/fileadmin/user_upload/eufao-fsi4dm/doc-training/hfias.pdf) accessed on  
9  
10 10/01/2017  
11  
12  
13  
14 46. Tesfaye M, Kaestel P, Olsen MF, Girma T, Yilma D, Abdissa A, et al. Food insecurity,  
15 mental health and quality of life among people living with HIV commencing antiretroviral  
16 treatment in Ethiopia: a cross-sectional study. *Health and quality of life outcomes*. 2016; 14:37.  
17  
18  
19  
20  
21 47. Maes KC, Hadley C, Tesfaye F, Shifferaw S, Tesfaye YA. Food insecurity among  
22 volunteer AIDS caregivers in Addis Ababa, Ethiopia was highly prevalent but buffered from the  
23 2008 food crisis. *The Journal of nutrition*. 2009; 139(9):1758-64.  
24  
25  
26  
27  
28  
29 48. Greenland S, Pearl J, Robins JM. Causal diagrams for epidemiologic research.  
30 *Epidemiology*. 1999; 10(1):37-48.  
31  
32  
33  
34  
35 49. Textor J, Hardt J, Knuppel S. DAGitty: a graphical tool for analyzing causal diagrams.  
36 *Epidemiology*. 2011; 22(5):745.  
37  
38  
39  
40 50. Shrier I, Platt RW. Reducing bias through directed acyclic graphs. *BMC Med Res*  
41 *Methodol*. 2008; 8:70.  
42  
43  
44  
45 51. Woimo TT, Yimer WK, Bati T, Gesesew HA. The prevalence and factors associated for  
46 anti-tuberculosis treatment non-adherence among pulmonary tuberculosis patients in public  
47 health care facilities in South Ethiopia: a cross-sectional study. *BMC Public Health*. 2017;  
48 17(1):269.  
49  
50  
51  
52  
53  
54  
55  
56  
57  
58  
59  
60

- 1  
2  
3 52. Mekonnen HS, Azagew AW. Non-adherence to anti-tuberculosis treatment, reasons and  
4 associated factors among TB patients attending at Gondar town health centers, Northwest  
5 Ethiopia. *BMC research notes*. 2018; 11(1):691.  
6  
7  
8  
9  
10  
11 53. Tola HH, Garmaroudi G, Shojaeizadeh D, Tol A, Yekaninejad MS, Ejeta LT, et al. The  
12 Effect of Psychosocial Factors and Patients' Perception of Tuberculosis Treatment Non-  
13 Adherence in Addis Ababa, Ethiopia. *Ethiopian journal of health sciences*. 2017; 27(5):447-58.  
14  
15  
16  
17  
18 54. Adane AA, Alene KA, Koye DN, Zeleke BM. Non-adherence to anti-tuberculosis  
19 treatment and determinant factors among patients with tuberculosis in northwest Ethiopia. *PLoS*  
20 *One*. 2013; 8(11):e78791.  
21  
22  
23  
24  
25  
26 55. Ricks PM, Hershov RC, Rahimian A, Huo D, Johnson W, Prachand N, et al. A  
27 randomized trial comparing standard outcomes in two treatment models for substance users with  
28 tuberculosis. *Int J Tuberc Lung Dis*. 2015; 19(3):326-32.  
29  
30  
31  
32  
33  
34 56. Sahile Z, Yared A, Kaba M. Patients' experiences and perceptions on associates of TB  
35 treatment adherence: a qualitative study on DOTS service in public health centers in Addis  
36 Ababa, Ethiopia. *BMC Public Health*. 2018; 18(1):462.  
37  
38  
39  
40  
41  
42 57. Hasker E, Khodjikhhanov M, Usarova S, Asamidinov U, Yuldashova U, van der Werf MJ,  
43 et al. Default from tuberculosis treatment in Tashkent, Uzbekistan; who are these defaulters and  
44 why do they default? *BMC Infect Dis*. 2008; 8:97.  
45  
46  
47  
48  
49  
50 58. Cayla JA, Caminero JA, Rey R, Lara N, Valles X, Galdos-Tanguis H. Current status of  
51 treatment completion and fatality among tuberculosis patients in Spain. *Int J Tuberc Lung Dis*.  
52 2004; 8(4):458-64.  
53  
54  
55  
56  
57



- 1  
2  
3 59. Dooley KE, Lahlou O, Ghali I, Knudsen J, Elmessaoudi MD, Cherkaoui I, et al. Risk  
4 factors for tuberculosis treatment failure, default, or relapse and outcomes of retreatment in  
5 Morocco. *BMC Public Health*. 2011; 11:140.  
6  
7  
8  
9  
10  
11 60. Tesfahuneygn G, Medhin G, Legesse M. Adherence to Anti-tuberculosis treatment and  
12 treatment outcomes among tuberculosis patients in Alamata District, northeast Ethiopia. *BMC*  
13 *research notes*. 2015; 8:503.  
14  
15  
16  
17  
18 61. Anaam MS, Mohamed Ibrahim MI, Al Serouri AW, Aldobhani A. Factors affecting  
19 patients' compliance to anti-tuberculosis treatment in Yemen. *Journal of Pharmaceutical Health*  
20 *Services Research*. 2013; 4(2):115-22.  
21  
22  
23  
24  
25  
26 62. Adane K, Spigt M, Ferede S, Asmelash T, Abebe M, Dinant GJ. Half of Pulmonary  
27 Tuberculosis Cases Were Left Undiagnosed in Prisons of the Tigray Region of Ethiopia:  
28 Implications for Tuberculosis Control. *PLoS One*. 2016; 11(2):e0149453.  
29  
30  
31  
32  
33  
34 63. Fang XH, Dan YL, Liu J, Jun L, Zhang ZP, Kan XH, et al. Factors influencing  
35 completion of treatment among pulmonary tuberculosis patients. *Patient Prefer Adherence*. 2019;  
36 13:491-6.  
37  
38  
39  
40  
41  
42 64. Kawatsu L, Uchimura K, Ohkado A, Kato S. A combination of quantitative and  
43 qualitative methods in investigating risk factors for lost to follow-up for tuberculosis treatment in  
44 Japan - Are physicians and nurses at a particular risk? *PLoS One*. 2018; 13(6):e0198075.  
45  
46  
47  
48  
49 65. Gebreweld FH, Kifle MM, Gebremicheal FE, Simel LL, Gezae MM, Ghebreyesus SS, et  
50 al. Factors influencing adherence to tuberculosis treatment in Asmara, Eritrea: a qualitative  
51 study. *J Health Popul Nutr*. 2018; 37(1):1.  
52  
53  
54  
55  
56  
57  
58  
59  
60

# Reporting checklist for cohort study.

Based on the STROBE cohort guidelines.

## Instructions to authors

Complete this checklist by entering the page numbers from your manuscript where readers will find each of the items listed below.

Your article may not currently address all the items on the checklist. Please modify your text to include the missing information. If you are certain that an item does not apply, please write "n/a" and provide a short explanation.

Upload your completed checklist as an extra file when you submit to a journal.

In your methods section, say that you used the STROBE cohort reporting guidelines, and cite them as:

von Elm E, Altman DG, Egger M, Pocock SJ, Gøtzsche PC, Vandenbroucke JP. The Strengthening the Reporting of Observational Studies in Epidemiology (STROBE) Statement: guidelines for reporting observational studies.

|                           |                     |                                                                                    | Page<br>Number |
|---------------------------|---------------------|------------------------------------------------------------------------------------|----------------|
| <b>Title and abstract</b> |                     |                                                                                    |                |
| Title                     | <a href="#">#1a</a> | Indicate the study's design with a commonly used term in the title or the abstract | 1              |
| Abstract                  | <a href="#">#1b</a> | Provide in the abstract an informative and balanced summary                        | 2,3            |

of what was done and what was found

## Introduction

Background / [#2](#) Explain the scientific background and rationale for the 4-6  
 rationale investigation being reported

Objectives [#3](#) State specific objectives, including any prespecified 6  
 hypotheses

## Methods

Study design [#4](#) Present key elements of study design early in the paper 6

Setting [#5](#) Describe the setting, locations, and relevant dates, including 6  
 periods of recruitment, exposure, follow-up, and data collection

Eligibility criteria [#6a](#) Give the eligibility criteria, and the sources and methods of 6  
 selection of participants. Describe methods of follow-up.

Eligibility criteria [#6b](#) For matched studies, give matching criteria and number of  
 exposed and unexposed

Variables [#7](#) Clearly define all outcomes, exposures, predictors, potential 7-10  
 confounders, and effect modifiers. Give diagnostic criteria, if  
 applicable

Data sources / [#8](#) For each variable of interest give sources of data and details of 7-10  
 measurement methods of assessment (measurement). Describe  
 comparability of assessment methods if there is more than one  
 group. Give information separately for for exposed and  
 unexposed groups if applicable.

|    |                |                      |                                                                   |        |
|----|----------------|----------------------|-------------------------------------------------------------------|--------|
| 1  | Bias           | <a href="#">#9</a>   | Describe any efforts to address potential sources of bias         | 10,11  |
| 2  |                |                      |                                                                   |        |
| 3  |                |                      |                                                                   |        |
| 4  | Study size     | <a href="#">#10</a>  | Explain how the study size was arrived at                         | 7      |
| 5  |                |                      |                                                                   |        |
| 6  |                |                      |                                                                   |        |
| 7  | Quantitative   | <a href="#">#11</a>  | Explain how quantitative variables were handled in the            | 10, 11 |
| 8  | variables      |                      | analyses. If applicable, describe which groupings were chosen,    |        |
| 9  |                |                      | and why                                                           |        |
| 10 |                |                      |                                                                   |        |
| 11 |                |                      |                                                                   |        |
| 12 |                |                      |                                                                   |        |
| 13 |                |                      |                                                                   |        |
| 14 |                |                      |                                                                   |        |
| 15 | Statistical    | <a href="#">#12a</a> | Describe all statistical methods, including those used to control | 10,11  |
| 16 | methods        |                      | for confounding                                                   |        |
| 17 |                |                      |                                                                   |        |
| 18 |                |                      |                                                                   |        |
| 19 |                |                      |                                                                   |        |
| 20 | Statistical    | <a href="#">#12b</a> | Describe any methods used to examine subgroups and                |        |
| 21 | methods        |                      | interactions                                                      |        |
| 22 |                |                      |                                                                   |        |
| 23 |                |                      |                                                                   |        |
| 24 |                |                      |                                                                   |        |
| 25 |                |                      |                                                                   |        |
| 26 | Statistical    | <a href="#">#12c</a> | Explain how missing data were addressed                           | 10     |
| 27 | methods        |                      |                                                                   |        |
| 28 |                |                      |                                                                   |        |
| 29 |                |                      |                                                                   |        |
| 30 |                |                      |                                                                   |        |
| 31 | Statistical    | <a href="#">#12d</a> | If applicable, explain how loss to follow-up was addressed        |        |
| 32 | methods        |                      |                                                                   |        |
| 33 |                |                      |                                                                   |        |
| 34 |                |                      |                                                                   |        |
| 35 |                |                      |                                                                   |        |
| 36 | Statistical    | <a href="#">#12e</a> | Describe any sensitivity analyses                                 |        |
| 37 | methods        |                      |                                                                   |        |
| 38 |                |                      |                                                                   |        |
| 39 |                |                      |                                                                   |        |
| 40 |                |                      |                                                                   |        |
| 41 |                |                      |                                                                   |        |
| 42 | <b>Results</b> |                      |                                                                   |        |
| 43 |                |                      |                                                                   |        |
| 44 |                |                      |                                                                   |        |
| 45 | Participants   | <a href="#">#13a</a> | Report numbers of individuals at each stage of study—eg           | 12     |
| 46 |                |                      | numbers potentially eligible, examined for eligibility, confirmed |        |
| 47 |                |                      | eligible, included in the study, completing follow-up, and        |        |
| 48 |                |                      | analysed. Give information separately for for exposed and         |        |
| 49 |                |                      | unexposed groups if applicable.                                   |        |
| 50 |                |                      |                                                                   |        |
| 51 |                |                      |                                                                   |        |
| 52 |                |                      |                                                                   |        |
| 53 |                |                      |                                                                   |        |
| 54 |                |                      |                                                                   |        |
| 55 |                |                      |                                                                   |        |
| 56 |                |                      |                                                                   |        |
| 57 | Participants   | <a href="#">#13b</a> | Give reasons for non-participation at each stage                  |        |
| 58 |                |                      |                                                                   |        |
| 59 |                |                      |                                                                   |        |
| 60 |                |                      |                                                                   |        |

|    |                   |                      |                                                                   |        |
|----|-------------------|----------------------|-------------------------------------------------------------------|--------|
| 1  | Participants      | <a href="#">#13c</a> | Consider use of a flow diagram                                    |        |
| 2  |                   |                      |                                                                   |        |
| 3  |                   |                      |                                                                   |        |
| 4  | Descriptive data  | <a href="#">#14a</a> | Give characteristics of study participants (eg demographic,       | 12, 13 |
| 5  |                   |                      | clinical, social) and information on exposures and potential      |        |
| 6  |                   |                      | confounders. Give information separately for exposed and          |        |
| 7  |                   |                      | unexposed groups if applicable.                                   |        |
| 8  |                   |                      |                                                                   |        |
| 9  |                   |                      |                                                                   |        |
| 10 |                   |                      |                                                                   |        |
| 11 |                   |                      |                                                                   |        |
| 12 |                   |                      |                                                                   |        |
| 13 |                   |                      |                                                                   |        |
| 14 | Descriptive data  | <a href="#">#14b</a> | Indicate number of participants with missing data for each        | 12     |
| 15 |                   |                      | variable of interest                                              |        |
| 16 |                   |                      |                                                                   |        |
| 17 |                   |                      |                                                                   |        |
| 18 |                   |                      |                                                                   |        |
| 19 | Descriptive data  | <a href="#">#14c</a> | Summarise follow-up time (eg, average and total amount)           |        |
| 20 |                   |                      |                                                                   |        |
| 21 |                   |                      |                                                                   |        |
| 22 |                   |                      |                                                                   |        |
| 23 | Outcome data      | <a href="#">#15</a>  | Report numbers of outcome events or summary measures              | 14, 15 |
| 24 |                   |                      | over time. Give information separately for exposed and            |        |
| 25 |                   |                      | unexposed groups if applicable.                                   |        |
| 26 |                   |                      |                                                                   |        |
| 27 |                   |                      |                                                                   |        |
| 28 |                   |                      |                                                                   |        |
| 29 |                   |                      |                                                                   |        |
| 30 | Main results      | <a href="#">#16a</a> | Give unadjusted estimates and, if applicable, confounder-         | 14-18  |
| 31 |                   |                      | adjusted estimates and their precision (eg, 95% confidence        |        |
| 32 |                   |                      | interval). Make clear which confounders were adjusted for and     |        |
| 33 |                   |                      | why they were included                                            |        |
| 34 |                   |                      |                                                                   |        |
| 35 |                   |                      |                                                                   |        |
| 36 |                   |                      |                                                                   |        |
| 37 |                   |                      |                                                                   |        |
| 38 |                   |                      |                                                                   |        |
| 39 |                   |                      |                                                                   |        |
| 40 | Main results      | <a href="#">#16b</a> | Report category boundaries when continuous variables were         |        |
| 41 |                   |                      | categorized                                                       |        |
| 42 |                   |                      |                                                                   |        |
| 43 |                   |                      |                                                                   |        |
| 44 |                   |                      |                                                                   |        |
| 45 | Main results      | <a href="#">#16c</a> | If relevant, consider translating estimates of relative risk into |        |
| 46 |                   |                      | absolute risk for a meaningful time period                        |        |
| 47 |                   |                      |                                                                   |        |
| 48 |                   |                      |                                                                   |        |
| 49 |                   |                      |                                                                   |        |
| 50 |                   |                      |                                                                   |        |
| 51 | Other analyses    | <a href="#">#17</a>  | Report other analyses done—e.g., analyses of subgroups and        |        |
| 52 |                   |                      | interactions, and sensitivity analyses                            |        |
| 53 |                   |                      |                                                                   |        |
| 54 |                   |                      |                                                                   |        |
| 55 |                   |                      |                                                                   |        |
| 56 | <b>Discussion</b> |                      |                                                                   |        |
| 57 |                   |                      |                                                                   |        |
| 58 |                   |                      |                                                                   |        |
| 59 |                   |                      |                                                                   |        |
| 60 |                   |                      |                                                                   |        |

|    |                          |                     |                                                                      |       |
|----|--------------------------|---------------------|----------------------------------------------------------------------|-------|
| 1  | Key results              | <a href="#">#18</a> | Summarise key results with reference to study objectives             | 19-21 |
| 2  |                          |                     |                                                                      |       |
| 3  |                          |                     |                                                                      |       |
| 4  | Limitations              | <a href="#">#19</a> | Discuss limitations of the study, taking into account sources of     | 21    |
| 5  |                          |                     | potential bias or imprecision. Discuss both direction and            |       |
| 6  |                          |                     | magnitude of any potential bias.                                     |       |
| 7  |                          |                     |                                                                      |       |
| 8  |                          |                     |                                                                      |       |
| 9  |                          |                     |                                                                      |       |
| 10 |                          |                     |                                                                      |       |
| 11 |                          |                     |                                                                      |       |
| 12 | Interpretation           | <a href="#">#20</a> | Give a cautious overall interpretation considering objectives,       | 19-21 |
| 13 |                          |                     | limitations, multiplicity of analyses, results from similar studies, |       |
| 14 |                          |                     | and other relevant evidence.                                         |       |
| 15 |                          |                     |                                                                      |       |
| 16 |                          |                     |                                                                      |       |
| 17 |                          |                     |                                                                      |       |
| 18 |                          |                     |                                                                      |       |
| 19 | Generalisability         | <a href="#">#21</a> | Discuss the generalisability (external validity) of the study        |       |
| 20 |                          |                     | results                                                              |       |
| 21 |                          |                     |                                                                      |       |
| 22 |                          |                     |                                                                      |       |
| 23 |                          |                     |                                                                      |       |
| 24 |                          |                     |                                                                      |       |
| 25 | <b>Other Information</b> |                     |                                                                      |       |
| 26 |                          |                     |                                                                      |       |
| 27 |                          |                     |                                                                      |       |
| 28 | Funding                  | <a href="#">#22</a> | Give the source of funding and the role of the funders for the       | 23    |
| 29 |                          |                     | present study and, if applicable, for the original study on which    |       |
| 30 |                          |                     | the present article is based                                         |       |
| 31 |                          |                     |                                                                      |       |
| 32 |                          |                     |                                                                      |       |
| 33 |                          |                     |                                                                      |       |
| 34 |                          |                     |                                                                      |       |
| 35 |                          |                     |                                                                      |       |

36 None The STROBE checklist is distributed under the terms of the Creative Commons Attribution  
37 License CC-BY. This checklist can be completed online using <https://www.goodreports.org/>, a tool  
38 made by the [EQUATOR Network](#) in collaboration with [Penelope.ai](#)  
39  
40  
41  
42  
43  
44  
45  
46  
47  
48  
49  
50  
51  
52  
53  
54  
55  
56  
57  
58  
59

# BMJ Open

## Substance use disorders and adherence to anti-tuberculosis medications in Southwest Ethiopia: A prospective cohort study

|                                 |                                                                                                                                                                                                                                                                                                                                                                                                                                                                                                                                                                                                                                                                                                                                                                                                                                                                                                                                                                                                                                                                                                                                                                                                                                                                                                                                                                                     |
|---------------------------------|-------------------------------------------------------------------------------------------------------------------------------------------------------------------------------------------------------------------------------------------------------------------------------------------------------------------------------------------------------------------------------------------------------------------------------------------------------------------------------------------------------------------------------------------------------------------------------------------------------------------------------------------------------------------------------------------------------------------------------------------------------------------------------------------------------------------------------------------------------------------------------------------------------------------------------------------------------------------------------------------------------------------------------------------------------------------------------------------------------------------------------------------------------------------------------------------------------------------------------------------------------------------------------------------------------------------------------------------------------------------------------------|
| Journal:                        | <i>BMJ Open</i>                                                                                                                                                                                                                                                                                                                                                                                                                                                                                                                                                                                                                                                                                                                                                                                                                                                                                                                                                                                                                                                                                                                                                                                                                                                                                                                                                                     |
| Manuscript ID                   | bmjopen-2020-043050.R4                                                                                                                                                                                                                                                                                                                                                                                                                                                                                                                                                                                                                                                                                                                                                                                                                                                                                                                                                                                                                                                                                                                                                                                                                                                                                                                                                              |
| Article Type:                   | Original research                                                                                                                                                                                                                                                                                                                                                                                                                                                                                                                                                                                                                                                                                                                                                                                                                                                                                                                                                                                                                                                                                                                                                                                                                                                                                                                                                                   |
| Date Submitted by the Author:   | 31-May-2021                                                                                                                                                                                                                                                                                                                                                                                                                                                                                                                                                                                                                                                                                                                                                                                                                                                                                                                                                                                                                                                                                                                                                                                                                                                                                                                                                                         |
| Complete List of Authors:       | Daba, Mawitaw; Jimma University College of Public Health and Medical Sciences, Psychiatry; Center for International Health, Ludwig Maxmillians University, Munich, Germany<br>Tsefaye, Markos ; Department of Psychiatry, St. Paul's Hospital Millennium Medical College, Addis Ababa, Ethiopia, Psychiatry; Center for International Health, Ludwig Maxmillians University, Munich, Germany<br>Adorjan, Kristina; Department of Psychiatry and Psychotherapy, LMU Munich, Germany; Institute of Psychiatric Phenomics and Genomics (IPPG), University Hospital, LMU Munich, Germany<br>Krahl, Wolfgang ; Department of Forensic Psychiatry, Isar Amper Klinikum, Munich, Germany, Forensic Psychiatry; Center for International Health, Ludwig Maxmillians University, Munich, Germany<br>Tsefaye, Elias ; Department of Psychiatry, Medical Faculty, Jimma University, Jimma Ethiopia, Psychiatry<br>Yitayih, Yimenu; Jimma University College of Public Health and Medical Sciences, Psychiatry<br>Strobl, Ralf; Ludwig-Maximilians-Universitat Munchen, Institute for Medical Information Processing, Biometrics and Epidemiology<br>Grill, Eva; Ludwig Maximilians University Munich, Institute for Medical Information Processing, Biometrics and Epidemiology, LMU Munich, Munich, Germany ; Center for International Health, Ludwig Maxmillians University, Munich, Germany |
| <b>Primary Subject Heading</b>: | Addiction                                                                                                                                                                                                                                                                                                                                                                                                                                                                                                                                                                                                                                                                                                                                                                                                                                                                                                                                                                                                                                                                                                                                                                                                                                                                                                                                                                           |
| Secondary Subject Heading:      | Addiction, Infectious diseases, Mental health                                                                                                                                                                                                                                                                                                                                                                                                                                                                                                                                                                                                                                                                                                                                                                                                                                                                                                                                                                                                                                                                                                                                                                                                                                                                                                                                       |
| Keywords:                       | Substance misuse < PSYCHIATRY, Tuberculosis < INFECTIOUS DISEASES, INFECTIOUS DISEASES, CLINICAL PHARMACOLOGY                                                                                                                                                                                                                                                                                                                                                                                                                                                                                                                                                                                                                                                                                                                                                                                                                                                                                                                                                                                                                                                                                                                                                                                                                                                                       |
|                                 |                                                                                                                                                                                                                                                                                                                                                                                                                                                                                                                                                                                                                                                                                                                                                                                                                                                                                                                                                                                                                                                                                                                                                                                                                                                                                                                                                                                     |

SCHOLARONE™  
Manuscripts



I, the Submitting Author has the right to grant and does grant on behalf of all authors of the Work (as defined in the below author licence), an exclusive licence and/or a non-exclusive licence for contributions from authors who are: i) UK Crown employees; ii) where BMJ has agreed a CC-BY licence shall apply, and/or iii) in accordance with the terms applicable for US Federal Government officers or employees acting as part of their official duties; on a worldwide, perpetual, irrevocable, royalty-free basis to BMJ Publishing Group Ltd ("BMJ") its licensees and where the relevant Journal is co-owned by BMJ to the co-owners of the Journal, to publish the Work in this journal and any other BMJ products and to exploit all rights, as set out in our [licence](#).

The Submitting Author accepts and understands that any supply made under these terms is made by BMJ to the Submitting Author unless you are acting as an employee on behalf of your employer or a postgraduate student of an affiliated institution which is paying any applicable article publishing charge ("APC") for Open Access articles. Where the Submitting Author wishes to make the Work available on an Open Access basis (and intends to pay the relevant APC), the terms of reuse of such Open Access shall be governed by a Creative Commons licence – details of these licences and which [Creative Commons](#) licence will apply to this Work are set out in our licence referred to above.

Other than as permitted in any relevant BMJ Author's Self Archiving Policies, I confirm this Work has not been accepted for publication elsewhere, is not being considered for publication elsewhere and does not duplicate material already published. I confirm all authors consent to publication of this Work and authorise the granting of this licence.



1  
2  
3  
4  
5 **Substance use disorders and adherence to anti-tuberculosis medications in Southwest**  
6  
7 **Ethiopia: A prospective cohort study**  
8

9  
10 Matiws Soboka<sup>1\*,7</sup>, Markos Tesfaye<sup>2,7</sup>, Kristina Adorjan<sup>3,4,7</sup>, Wolfgang Krahl<sup>5,7</sup>, Elias  
11  
12 Tesfaye<sup>1</sup>, Yimenu Yitayih<sup>1</sup>, Ralf Strobl<sup>6</sup>, Eva Grill<sup>6,7</sup>  
13  
14  
15  
16  
17  
18  
19  
20

21 **\* Corresponding author:** Matiws Soboka, Department of Psychiatry, Medical Faculty, Jimma University, Jimma  
22  
23 Ethiopia, Center for International Health, Ludwig Maxmillians University, Munich, Germany  
24

25  
26 **Email:** [matiwos2004@yahoo.com](mailto:matiwos2004@yahoo.com)  
27

28  
29 **Phone:** +251913792348  
30

31 <sup>1</sup> Department of Psychiatry, Medical Faculty, Jimma University, Jimma Ethiopia.  
32

33  
34 <sup>2</sup> Department of Psychiatry, St. Paul's Hospital Millennium Medical College, Addis Ababa, Ethiopia  
35

36  
37 <sup>3</sup> Department of Psychiatry and Psychotherapy, LMU Munich, Germany  
38

39  
40 <sup>4</sup> Institute of Psychiatric Phenomics and Genomics (IPPG), University Hospital, LMU Munich, Germany  
41

42  
43 <sup>5</sup>Department of Forensic Psychiatry, Isar Amper Klinikum, Munich, Germany  
44

45  
46 <sup>6</sup> Institute for Medical Information Processing, Biometrics and Epidemiology, LMU Munich, Munich, Germany  
47

48  
49 <sup>7</sup>Center for International Health, Ludwig Maxmillians University, Munich, Germany  
50  
51  
52  
53  
54  
55  
56  
57

## Abstract

**Objectives:** In Ethiopia, little is known about the association between substance use disorders and adherence to anti-TB medications. Therefore, the objective of this study was to assess the effect of substance use disorders on adherence to anti-TB medications in Southwest Ethiopia.

**Design:** Prospective cohort study.

**Settings:** Patients were recruited from 22 health centers and four hospitals in Southwest Ethiopia.

**Participants:** This study was conducted among 268 patients with tuberculosis, aged 18-80 in Southwest Ethiopia between October 2017 and October 2018. At baseline, patients who were exposed substance use disorders (134 patients) and unexposed to substance use disorders (134 patients) were recruited. Patients were followed for six months, and data were collected on three occasions.

**Main outcome measure:** Adherence to anti-TB medications.

**Results:** Patients with substance use disorders had consistently higher prevalence of non-adherence than those without, 16.4% vs. 3.0% at baseline, 41.7% vs 14.4% at two month follow up, and 45.7% vs 10.8% at six month follow up assessments. Patients with khat use disorder were 3.8 times more likely to be non-adherent to anti-TB medications than patients without khat use disorder (aOR 3.8, 95%CI=1.8-8.0). Patients who had alcohol use disorder were also 3.2 times likely to have poor adherence compared to their counterparts (aOR=3.2, 95%CI=1.6-6.6). In addition, being educated (aOR =4.4, 95%CI=1.7-11.3), and being merchant (aOR=6.1, 95%CI=1.2-3.0) were associated with non-adherence to anti-TB medications.

1  
2  
3 **Conclusion:** Khat and alcohol use disorders predict greater likelihood of non-adherence to anti-  
4 TB medication. This implies the need to integrate the management for substance use disorders  
5 into the existing tuberculosis treatment services.  
6  
7  
8  
9

10  
11 **Keywords:** Substance use disorders, alcohol, khat, anti-TB adherence, non-adherence, Ethiopia.  
12  
13

### 14 **Strengths and limitations**

- 15  
16  
17 ➤ The strengths of this study are the prospective cohort design, longitudinal data collection,  
18 including patients from urban and rural health institutions, intensive training for data  
19 collectors, multi-center data collection, and use of standardized instruments.  
20  
21  
22  
23  
24  
25 ➤ Due to social desirability, patients might minimize reporting of the amount and frequency  
26 of the substances they were using.  
27  
28  
29  
30  
31 ➤ Measuring adherence based on pills count may not reflect the real adherence situation,  
32 since patients may not bring all leftover medications during the follow up.  
33  
34  
35  
36 ➤ Follow up and data collections have been carried out by health professionals working in  
37 the respective TB clinic. As a result, their assessment of adherence might be biased.  
38  
39  
40  
41 ➤ Hospitalized patients, patients on re-treatment, and patients with MDR-TB were not  
42 included in this study, and this may limit the generalizability of the result for these  
43 patients.  
44  
45  
46  
47  
48  
49  
50  
51  
52  
53  
54  
55  
56  
57  
58  
59  
60

## Introduction

Tuberculosis (TB) is a preventable and treatable disease but it remains one of the major diseases leading to death worldwide (1, 2). World Health Organization (WHO) estimates that 1.6 million persons died of TB in 2017 (1); almost 20% of them were HIV positive (1). The number of TB patients is estimated at about 10 million with an annual incidence of 6.4%. TB remains the main reason for premature mortality among HIV positive patients (1).

TB is most prevalent in middle and low-income countries. This exerts enormous pressure on societies as TB mainly affects mostly adults in the economically productive age groups (1, 3, 4). In fact, 87% of cases worldwide are from Asia, Africa, and the Russian Federation (1, 5). Tuberculosis related morbidity and mortality also remain high in low and middle-income countries. Because these countries have poor nutrition, unfavorable housing conditions, and unstable health care (1). Notably, 117,705 new cases were registered in 2017 in Ethiopia, corresponding to an annual incidence of 164 per 100,000 inhabitants (1). Ethiopia remains one of the top 22 countries having the highest TB mortality with an estimated mortality rate of 24 per 100,000 inhabitants in 2017 (1).

Long-term adherence to standardized medication is the key to successful treatment of TB as non-adherence may lead to the emergence of multidrug-resistant TB (MDR-TB), an increasing global health threat (1, 6, 7). Non-adherence to anti-TB medication could also lead to a lower treatment success rate (8, 9), default, and death (10, 11). Thus, Ethiopia has developed a national TB treatment guideline to ensure adherence through regular appointments and supervised drug administration, and to reduce poor treatment outcomes (12).

1  
2  
3 In Ethiopia, the prevalence of non-adherence among TB patients has been estimated to range  
4 from 10% in Amhara region to 24% in Southern Nations and Nationalities of Ethiopia (13). To  
5  
6 counteract this, the Ethiopian has implemented Direct Observed Treatment (DOT) services in  
7  
8 almost all health institutions (12), but its impact on medication adherence is unclear and the  
9  
10 reasons for non-adherence are still poorly understood.  
11  
12  
13

14  
15 Among the reasons for non-adherence, substance use disorders have been found to play a  
16  
17 dominant role (8, 14-16). Substances such as alcohol, tobacco, khat, and illicit drugs are  
18  
19 commonly used among patients with TB (17-19). Patients with TB are also at risk of increased  
20  
21 morbidity, and premature mortality due to substance use disorders (20). Because, substance use  
22  
23 disorders such as alcohol and tobacco are associated with MDR-TB (21, 22).  
24  
25  
26

27  
28 Khat is a natural stimulant with over 40 active compounds. Among these, psychoactive alkaloids,  
29  
30 cathinone, and cathine cause the stimulating effect, and lead to craving and dependency (23-26).  
31  
32 There is evidence that khat use increases susceptibility to tuberculosis (27-31), and maybe  
33  
34 associated with poor TB treatment outcomes (14, 32), prolonged duration of treatment (33), and  
35  
36 high load of bacteria in TB patients (34). In Yemen, khat use has been shown to be associated  
37  
38 with non-adherence to anti-tuberculosis medications (35), probably because khat disrupts  
39  
40 patients' sleep patterns and causes them to miss their appointments (35, 36). Ethiopia, like  
41  
42 Yemen, counts among the few countries where khat use is legal. Khat use disorder may be an  
43  
44 important but unrecognized threat to anti-TB medication adherence. Filling the information gaps  
45  
46 about the effect of substance use disorders will help to improve TB treatment outcomes and  
47  
48 inform decision makers about the need for an integration of substance use disorder treatment in  
49  
50 TB control programs in the future. Therefore, the objective of this study is to assess the effect of  
51  
52 substance use disorders (including khat and alcohol) on adherence to anti-TB medications in  
53  
54  
55  
56  
57

1  
2  
3 Southwest Ethiopia. Specifically, we examined the association of the most frequently used  
4 substances, namely khat and/or alcohol, on adherence to guideline compatible TB treatment.  
5  
6  
7

## 8 **Methods**

### 9 **Study area, period, and patients**

10  
11  
12 We conducted a prospective cohort study in Jimma zone and Jimma city special zone. Jimma  
13 city special zone is the capital city of Jimma zone and located in the Southwestern part of  
14 Ethiopia, 352 km from Addis Ababa, the capital of the country. The city has a tertiary hospital  
15 and a zonal hospital, as well as four functional health centers those currently providing services.  
16  
17 Similarly, Jimma Zone has 18 districts and located in the Southwest of Ethiopia. Overall, the  
18 zone has more than three million inhabitants. During the period of this study, Jimma Zone had  
19 112 health centers and three hospitals. Out of these government's public health facilities, 91  
20 health centers and all hospitals were providing services to TB patients. In this study, data was  
21 collected from a total of 26 health institutions (22 health centers and four hospitals). From Jimma  
22 city, we randomly selected 2 health centers and one hospital. We also randomly selected 20  
23 health centers and three hospitals from the Jimma Zone. Patients were included if they had  
24 initiated anti-TB treatment within a month of start of the study at the selected health centers and  
25 hospitals between October 2017 and October 2018. Patients were recruited over the first six  
26 months. Follow-ups were done at the end of two and six months of treatment.  
27  
28  
29  
30  
31  
32  
33  
34  
35  
36  
37  
38  
39  
40  
41  
42  
43  
44  
45  
46  
47

### 48 **Study design**

49  
50  
51 This study is a multicenter prospective cohort study. We did not pair exposed and non-exposed  
52 patients by a certain character. Patients recruited to the cohort were interviewed on three  
53  
54  
55  
56  
57

1  
2  
3 occasions, namely, baseline (starting treatment), first follow up (after 2 months), and second  
4  
5 follow up (at the end of six months).  
6  
7

### 8 **Sample size assumption and sampling procedure**

9

10  
11 In Ethiopia and other African countries, we could not find a study done regarding substance use  
12 disorders (alcohol, tobacco, cannabis, amphetamine and others) and adherence to anti-TB. So,  
13 we were forced to calculate the sample based on the proportion of adherence to anti-TB among  
14 khat users TB patients. The prevalence of non-adherence among TB patients who also used khat  
15 from previous studies was 62·4% (35). The prevalence of non-adherence among non khat user  
16 TB patients was 43·6% (35). We have included 111 exposed (with substance use) and 111  
17 unexposed (without substance use) individuals to detect a difference of non-adherence to anti-TB  
18 medication at an alpha level of 0·05 and with a power of 80% using the corrected Fleiss sample  
19 size calculation [EPIInfo™] (37). The total sample size was calculated considering a 20% of drop  
20 out rate and the final sample size was 134 in each group which totals 268 TB patients. New TB  
21 patients who were 18 years or older were recruited to participate in the study. Patients who had  
22 been on treatment for more than one month, patients on re-treatment, and MDR-TB cases were  
23 not included in the study.  
24  
25  
26  
27  
28  
29  
30  
31  
32  
33  
34  
35  
36  
37  
38  
39  
40  
41

### 42 **Instruments**

43

### 44 **Exposure variables**

45

46 In this study, the exposure variable is substance use disorder which includes khat and/or alcohol  
47 use disorder.  
48  
49  
50  
51  
52  
53  
54  
55  
56  
57

1  
2  
3 *Substance use disorder*: In this study substance use disorder was defined as having khat and/or  
4 alcohol use disorder. Data on tobacco, shisha, and cannabis use were collected for explorative  
5 data analysis.  
6  
7  
8

9  
10  
11 *Alcohol use disorders (AUDs)*:-Alcohol use disorder identification test (AUDIT) was used to  
12 collect data on AUDs (38). The AUDIT was evaluated over a period of two decades, and  
13 provides an accurate measure of risk of AUDs across gender, age, and cultures. With a cut-off  
14 score of eight or more, the sensitivity, and specificity of AUDIT for AUDs was 0·90 and 0·80,  
15 respectively (39). AUDIT was used in Ethiopian context and questions number two and three  
16 regarding standard drinks were adapted to a more locally appropriate question (40).  
17  
18  
19

20  
21  
22 *Nicotine dependence*: The Fagerstrom test for nicotine dependence (FTND) was used to assess  
23 tobacco dependence. A total score of FTND  $\geq 5$  was considered as tobacco dependence (41). At  
24 a cut-off score  $\geq 5$ , the FTND has good sensitivity (0·75), and specificity (0·80). The FTND has  
25 six items, with a total score ranging from 0-10 to measure nicotine dependence. A total FTND  
26 score of five indicates moderate nicotine dependence, a score of 6-7 indicates high nicotine  
27 dependence, and a score of 8-10 indicates very high nicotine dependence. Patients were also  
28 asked about their reasons for smoking tobacco (41).  
29  
30  
31  
32  
33  
34  
35  
36  
37  
38  
39  
40  
41

42 *Cannabis and shisha use*: Use of both substances and their frequency were assessed.  
43  
44

45 *Khat use*: - Khat use was assessed by self-reported questionnaire. Since there is no standardized  
46 questionnaire for khat use, patterns, and reasons of khat use were assessed by using a structured  
47 questionnaire which was developed in the context of a literature review. Any consumption of  
48 khat in the last one month was considered as current khat use.  
49  
50  
51  
52  
53  
54  
55  
56  
57



1  
2  
3 In this study, frequent khat use (using khat daily and 2-3 times per week) and using more than  
4 one bundle of khat per day was considered as khat use disorder. The term 'khat use disorder' is  
5  
6 also supported by previous study (42).  
7  
8  
9

### 10 **Outcome variable**

11  
12  
13  
14 *Adherence:* Adherence status of tuberculosis patients was assessed by Direct Observed  
15 Treatment (DOT) (based on missing appointments) and pills counts. In this study, adherence is  
16 defined as taking medication regularly and attending follow-up according to appointments and  
17 national guideline for tuberculosis in Ethiopia (12). In this study, non-adherence is defined as  
18 missing at least one follow-up appointment during DOT. Non-adherence during intensive phase  
19 is defined as missing at least one dose of the prescribed anti-TB medication and noted separately.  
20  
21 Adherence was assessed at baseline (beginning of intensive phase), at second month (end of  
22 intensive phase), and at end of 6 month (end of continuation phase).  
23  
24  
25  
26  
27  
28  
29  
30  
31  
32

### 33 **Explanatory variables**

34  
35  
36 *Socio-demographic variables:* Age, sex, marital status, level of education, religion, ethnicity,  
37 income, household size, occupation, place of residence, and living conditions were assessed  
38 using a structured questionnaire. Income was categorized considering that the minimum monthly  
39 wage for employees of governmental organization in Ethiopia of 1,214 Ethiopian birr (36·67  
40 Euros) (43). Then the monthly income of each patient was multiplied by 12 months to obtain the  
41 annual income, and we used a cutoff 14,568 Ethiopian birr (439·98 Euros).  
42  
43  
44  
45  
46  
47  
48  
49  
50

51 *Disease related factors:* Types of TB diagnosis (smear positive, smear negative, extrapulmonary  
52 TB, and MDR-TB) were collected from patients' charts.  
53  
54  
55  
56  
57

1  
2  
3 *Comorbidities:* All confirmed diagnoses of HIV, previous mental illness, hypertension, and  
4 diabetes mellitus were collected from patients' charts.  
5  
6  
7

8  
9 *Social support:* Oslo Social Support Scale (The Oslo 3-items) was used to collect data on the  
10 strength of social support. The Oslo-3 total score 3-8 indicate poor social support, 9-11 indicate  
11 moderate social support, and 12-14 indicate strong social support (44). The scale had been  
12 validated in Ethiopia among patients with tuberculosis (45). Social support was assessed at  
13 baseline, second month (at first follow up), and six month (at the completion of anti-TB  
14 treatment or second follow up).  
15  
16  
17  
18  
19  
20  
21  
22

23 *Food insecurity:* It was assessed using the Household Food Insecurity Access Scale (HFIAS) to  
24 determine whether the respondent has experienced any of the indicators of food insecurity in the  
25 previous month. Food secure if none of the items were endorsed on HFIAS, mild food insecurity  
26 if the respondent endorsed any of the items 1, 2, 3, and/or 4 but not the items 5 to 9, 'moderate  
27 food insecurity' if the respondent has endorsed items 5, and/or 6 but not the items 7 to 9, and  
28 'severe food insecurity' if the respondent has endorsed items 7, 8, and/or 9 (46). This tool had  
29 been validated in Ethiopia among people living with HIV (47, 48). Food insecurity assessed at  
30 baseline, second month (at first follow up), and six month (at the completion of anti-TB  
31 treatment or second follow up).  
32  
33  
34  
35  
36  
37  
38  
39  
40  
41  
42  
43  
44

#### 45 **Data collection procedures**

46  
47  
48 Before starting data collection, the questionnaires were pretested on a sample (5% of the total  
49 sample) of patients with TB who were on treatment at Agaro health center. Those patients who  
50 participated in the pretest were not included in the main cohort study. Data were collected by  
51 trained health professionals working in the respective TB clinics. Data collectors were not blind  
52  
53  
54  
55  
56  
57  
58  
59  
60

1  
2  
3 to exposure status of the patients. Also, district tuberculosis focal persons and other health  
4 professionals specifically trained for this purpose participated in the supervision of data  
5 collection.  
6  
7  
8  
9

## 10 **Data analysis**

11  
12  
13  
14 Data were entered to Epi Data (version 3.1) and analyzed using R studio (1.2.1335). Missing  
15 values of income were excluded from the analysis. Participants' characteristics and study  
16 variables were presented using descriptive statistics. Generalized linear model was used to  
17 examine the longitudinal effect of khat and alcohol use disorders on medication adherence  
18 (binary outcome). We used an intercept only model to investigate the trajectory of adherence  
19 over time (model 0). Model 1 investigated the longitudinal effect of presence or absence of khat  
20 and alcohol use disorders on adherence without adjusting for covariates, model 2 investigated the  
21 longitudinal effect of khat and alcohol on adherence while adjusting for the full set of covariates.  
22 Model fit was examined with the Bayesian Information Criterion (BIC).  
23  
24  
25  
26  
27  
28  
29  
30  
31  
32  
33  
34

35  
36 The covariate selection was based on a directed acyclic graph (DAG). DAGs are analytical  
37 method for visualizing hypotheses about causal relationships between exposure (substance use  
38 disorders) and outcome (adherence) (49, 50). This approach has been shown to yield valid  
39 adjustment sets of variables and to avoid bias (51).  
40  
41  
42  
43  
44

## 45 **Ethical considerations**

46  
47  
48  
49 Ethical clearance was obtained from the Ethical Review Board of Jimma University  
50 (IHRPGC1095/2017) and LMU (Nr: 18-017). The study was discussed in detail and written  
51 informed consent was obtained from each participant. The anonymity of the study participants  
52 was kept at all stages of data processing and write-up of the manuscript. Patients who had  
53  
54  
55  
56  
57

alcohol and khat use disorder were advised to contact a mental health professional for further evaluation and treatment.

## Patient and public involvement

Patients were not involved in development of the research questions, study design, interpretation of results or writing of the manuscript.

## Results

### Socio-demographic characteristics

A total of 268 newly diagnosed patients (50% with substance use disorders, mean age 32.4, SD 14.4, 60.1% male) with tuberculosis were recruited. There was no loss to follow up.

Of all patients, 10.8% (n=29), and 39.2% (n= 105) had alcohol and khat use disorders, respectively. No participant had tobacco, shisha, or cannabis use disorders. Age range was 18-80 years with 35% under 25 years (Refer to table 1). There were 22 missing data of annual income which we excluded from the analysis.

**Table1: Socio-demographic characteristics and substance use disorder among a cohort of patients on anti-tuberculosis treatment in Southwest Ethiopia, 2017/18 (n=268).**

| Variables |        | Total (%) | Substance use disorder |                          |                                    |
|-----------|--------|-----------|------------------------|--------------------------|------------------------------------|
|           |        |           | Baseline<br>N (%)      | First follow-up<br>N (%) | 2 <sup>nd</sup> follow up<br>N (%) |
| Gender    | Female | 39.9      | 40(37.4)               | 35(32.7)                 | 45(42.1)                           |
|           | Male   | 60.1      | 94(58.4)               | 80(49.7)                 | 84(52.2)                           |
| Age       | 18-24  | 34.7      | 42(45.2)               | 31(33.3)                 | 38(40.9)                           |
|           | 25-34  | 32.5      | 35(40.2)               | 34(39.1)                 | 35(40.2)                           |

|                       |                     |      |           |          |           |
|-----------------------|---------------------|------|-----------|----------|-----------|
|                       | 35-44               | 13·4 | 23(63·9)  | 20(55·6) | 22(61·1)  |
|                       | 45-54               | 10·1 | 17(63·0)  | 16(59·3) | 18(66·7)  |
|                       | 55-64               | 9·3  | 17(68·0)  | 14(56·0) | 16(64·0)  |
| Occupation            | Merchant            | 10·8 | 23(79·3)  | 19(65·5) | 20(69·0)  |
|                       | Farmer              | 34·3 | 57(62·0)  | 51(55·4) | 57(62·0)  |
|                       | Government employee | 39·2 | 37(35·2)  | 29(27·6) | 33(31·4)  |
|                       | Daily laborer       | 15·7 | 17(40·5)  | 16(38·1) | 19(45·2)  |
| Education             | No formal education | 63·1 | 68(40·2)  | 59(34·9) | 62(36·7)  |
|                       | Literate            | 36·9 | 66(66·7)  | 56(56·6) | 67(67·7)  |
| Annual income in Birr | <14568              | 76·9 | 108(52·4) | 92(44·7) | 104(50·5) |
|                       | ≥14568              | 14·9 | 16(40·0)  | 17(42·5) | 18(45·0)  |
| Marital               | Single              | 36·2 | 85(54·1)  | 76(48·4) | 87(55·4)  |
|                       | Married             | 58·6 | 39(40·2)  | 32(33·0) | 34(35·1)  |
|                       | Divorced/widowed    | 5·2  | 10(71·4)  | 7(50·0)  | 8(57·1)   |
| Religion              | Orthodox            | 30·6 | 43(52·4)  | 27(32·9) | 43(52·4)  |
|                       | Muslim              | 61·6 | 89(53·9)  | 86(52·1) | 82(49·7)  |
|                       | Protestant/others   | 7·8  | 2(9·5)    | 2(9·5)   | 4(19·0)   |
| Ethnicity             | Amhara              | 22·0 | 27(45·8)  | 17(28·8) | 29(49·2)  |
|                       | Oromo               | 61·6 | 83(50·3)  | 82(49·7) | 79(47·9)  |
|                       | Tigre/Gurage        | 16·4 | 24(54·5)  | 16(36·4) | 21(47·7)  |
| Family size           | Less than five      | 67·5 | 89(49·2)  | 76(42·0) | 89(49·2)  |
|                       | Five or greater     | 32·5 | 45(51·7)  | 39(44·8) | 40(46·0)  |
| Residence             | Rural               | 47·4 | 72(56·7)  | 59(46·5) | 68(53·5)  |
|                       | Urban               | 52·6 | 62(44·0)  | 56(39·7) | 61(43·3)  |
| Type of               | Smear positive,     | 40·3 | 54(50·0)  | 43(39·8) | 46(42·6)  |

|              |                 |      |          |          |          |
|--------------|-----------------|------|----------|----------|----------|
| tuberculosis | Smear negative  | 32.5 | 43(49.4) | 39(44.8) | 46(52.9) |
|              | Extra pulmonary | 27.2 | 37(50.7) | 33(45.2) | 37(50.7) |

### Clinical characteristics and non-adherence

Out of all patients, 40.3 % (n=108), 32.5 % (n=87), and 27.2 % (n=73) were diagnosed with smear positive, smear negative, and extra pulmonary TB respectively. At baseline, 3.7% (n=10) patients were diagnosed with HIV, and 7.1% (n=19) with other comorbidities. At baseline 9.7 % (n=26) were non-adherent to TB medication. At two and six months of assessment, 26.1% (n=70) and 27.6% (n=74) missed at least one dose of their medications respectively. .

The prevalence of non-adherence among patients with substance use disorder was 16.4% (n=22), 41.7 % (n=48), and 45.7% (n=59) at baseline, first, and second follow up respectively (See table 2).

**Table 2: Various characteristics by adherence to anti-TB medications at the three time point assessments among patients with tuberculosis in Southwest Ethiopia 2017/18 (n=268)**

| Variables              |        | Adherence to anti-TB at baseline |                       | Adherence to anti-TB at first follow-up |                       | Adherence to anti-TB at second follow-up |                       |
|------------------------|--------|----------------------------------|-----------------------|-----------------------------------------|-----------------------|------------------------------------------|-----------------------|
|                        |        | Adherent<br>N (%)                | Non-adherent<br>N (%) | Adherent<br>N (%)                       | Non-adherent<br>N (%) | Adherent<br>N (%)                        | Non-adherent<br>N (%) |
| Substance use disorder | No     | 130(97.0)                        | 4(3.0)                | 131(85.6)                               | 22(14.4)              | 124(89.2)                                | 15(10.8)              |
|                        | Yes    | 112(83.6)                        | 22(16.4)              | 67(58.3)                                | 48(41.7)              | 70(54.3)                                 | 59(45.7)              |
| Gender                 | Male   | 143(88.8)                        | 18(11.2)              | 112(69.6)                               | 49(30.4)              | 83(77.6)                                 | 24(22.4)              |
|                        | Female | 99(92.5)                         | 8(7.5)                | 86(80.4)                                | 21(19.6)              | 111(68.9)                                | 50(31.1)              |

|                       |                     |           |          |           |          |           |          |
|-----------------------|---------------------|-----------|----------|-----------|----------|-----------|----------|
| Age                   | 18-24               | 88(94·6)  | 5(5·4)   | 72(77·3)  | 21(22·7) | 69(74·2)  | 24(25·8) |
|                       | 25-34               | 79(90·8)  | 8(9·2)   | 64(73·7)  | 23(26·3) | 67(77·0)  | 20(23·0) |
|                       | 35-44               | 28(77·8)  | 8(22·2)  | 24(66·7)  | 12(33·3) | 23(63·9)  | 13(36·1) |
|                       | 45-54               | 24(88·9)  | 3(11·1)  | 21(77·8)  | 6(22·2)  | 19(70·4)  | 8(29·6)  |
|                       | 55-64               | 23(92·0)  | 2(8·0)   | 17(68·0)  | 8(32·0)  | 16(64·0)  | 9(36·0)  |
| Occupation            | Merchant            | 22(75·9)  | 7(24·1)  | 17(58·6)  | 12(41·4) | 14(48·3)  | 15(51·7) |
|                       | Farmer              | 79(85·9)  | 23(14·1) | 66(71·7)  | 26(28·3) | 64(69·6)  | 28(30·4) |
|                       | Government Employee | 21(95·5)  | 1(4·5)   | 79(75·2)  | 26(24·8) | 82(78·1)  | 23(21·9) |
|                       | Daily laborer       | 41(97·6)  | 1(2·4)   | 36(85·0)  | 6(14·3)  | 34(81·0)  | 8(19·0)  |
| Education             | No formal education | 165(97·6) | 4(2·4)   | 145(85·8) | 24(14·2) | 139(82·2) | 30(17·8) |
|                       | Literate            | 77(77·8)  | 22(22·2) | 53(53·5)  | 46(46·5) | 55(55·6)  | 44(44·4) |
|                       | Tertiary            | 20(71·4)  | 8(28·6)  | 8(28·6)   | 20(71·4) | 10(35·7)  | 18(64·3) |
| Annual income in Birr | <14568              | 185(89·8) | 21(10·2) | 154(74·8) | 52(25·2) | 149(72·3) | 57(27·7) |
|                       | ≥14568              | 37(92·5)  | 3(7·5)   | 30(75·0)  | 10(25·0) | 31(77·5)  | 9(22·5)  |
| Food insecurity       | No                  | 129(94·9) | 7(5·1)   | 105(72·4) | 40(27·6) | 118(72·8) | 44(27·2) |
|                       | Middle/moderate     | 46(80·7)  | 11(19·3) | 29(70·0)  | 12(29·3) | 26(60·5)  | 17(39·5) |
|                       | Severe              | 67(89·3)  | 8(10·7)  | 64(78·0)  | 18(22·0) | 50(79·4)  | 13(20·6) |
| Marital status        | Single              | 92(94·8)  | 5(5·2)   | 109(69·4) | 48(30·6) | 80(82·5)  | 17(17·5) |
|                       | Married             | 140(89·2) | 17(10·8) | 80(85·8)  | 17(17·2) | 104(66·2) | 53(33·8) |
|                       | Divorced/widowed    | 10(71·4)  | 4(28·6)  | 9(64·6)   | 5(37·4)  | 10(71·4)  | 4(28·6)  |
| Religion              | Orthodox            | 74(90·2)  | 8(9·8)   | 63(76·8)  | 19(23·2) | 61(74·4)  | 21(25·6) |
|                       | Muslim              | 147(89·7) | 18(10·3) | 118(71·5) | 47(28·5) | 114(69·1) | 51(39·9) |

|                |                       |           |          |           |          |           |          |
|----------------|-----------------------|-----------|----------|-----------|----------|-----------|----------|
|                | Protestant and others | 20(95·2)  | 1(4·8)   | 17(81·0)  | 4(19·0)  | 19(90·5)  | 2(9·5)   |
| Ethnicity      | Amhara                | 53(89·8)  | 6(10·2)  | 49(83·1)  | 10(16·9) | 48(81·4)  | 11(18·6) |
|                | Oromo                 | 160(90·9) | 16(9·1)  | 119(72·1) | 46(27·9) | 119(72·1) | 46(27·9) |
|                | Tigre/Gurage          | 29(87·9)  | 4(12·1)  | 30(68·2)  | 14(31·8) | 27(61·4)  | 17(38·6) |
| Family size    | Less than five        | 165(91·2) | 16(8·8)  | 132(72·9) | 49(27·1) | 137(75·7) | 44(24·3) |
|                | Five or greater       | 77(88·5)  | 10(11·5) | 66(75·9)  | 21(24·1) | 57(64·5)  | 30(34·5) |
| Residence      | Rural                 | 113(89·0) | 14(11·0) | 94(74·0)  | 33(26·0) | 93(73·2)  | 34(26·8) |
|                | Urban                 | 129(91·5) | 12(8·5)  | 104(73·0) | 37(26·2) | 101(71·6) | 40(28·4) |
| Type of TB     | Smear positive        | 95(91·9)  | 13(8·1)  | 80(74·1)  | 28(25·9) | 78(72·2)  | 30(27·8) |
|                | Smear negative        | 81(9·1)   | 6(6·9)   | 66(75·9)  | 21(24·1) | 64(73·6)  | 23(26·4) |
|                | Extra pulmonary       | 66(90·4)  | 7(9·6)   | 52(71·2)  | 21(28·8) | 52(71·2)  | 21(28·8) |
| HIV            | Seronegative          | 233(90·3) | 25(9·7)  | 190(74·2) | 66(25·8) | 183(73·5) | 66(26·5) |
|                | Seropositive          | 9(90·0)   | 1(10·0)  | 8(66·7)   | 4(33·3)  | 11(57·9)  | 8(42·1)  |
| Social support | Poor                  | 83(89·2)  | 10(10·8) | 83(74·8)  | 28(25·2) | 96(68·6)  | 44(34·1) |
|                | Moderate              | 101(89·4) | 12(10·6) | 68(80·0)  | 17(20·0) | 58(78·4)  | 16(21·6) |
|                | Good                  | 58(93·5)  | 4(6·5)   | 47(65·3)  | 25(34·7) | 40(74·1)  | 14(25·9) |

### Effect of substance use disorder on the adherence to anti-TB medications

The intercept only model (model 0) showed a significant decrease in the percentage of adherence over time (BIC= 642.5). Adding alcohol and khat use disorders (model 1) improved model fit (BIC=627.6): Patients with khat use disorder had a significantly higher probability of non-adherence over time (OR= 4.2, 95%CI=2.1-8.6). The odds of non-adherence among patients with



alcohol use disorder (AUDs) was 3.3 times that of patients free of AUDs (OR=3.3, 95%CI=1.6-6.6). Adding covariates did not substantially change this association (OR= 2.8, 95%CI=2.0-3.8) and further improved model fit (BIC= 642.2). In the final model, khat use disorder (aOR= 3.8, 95%CI=1.8-8.0), or alcohol use disorder (aOR= 3.2, 95%CI=1.6-6.6), being educated (aOR=4.4, 95%CI=1.7-11.3), and being merchant (aOR=6.1, 95%CI= 1.2-30.8) were associated with decreasing adherence (See table 3). Patients with khat use disorder were 3.8 times more likely to be non-adherent to anti-TB medications than patients without khat use disorder. Also, participants whose occupation was merchant were 6.1 times more likely to be non-adherent to anti-TB medications compared to daily laborers.

**Table 3: Predictors of non-adherence to anti TB medications among patients with tuberculosis in Southwest Ethiopia 2017/2018 (n=268).**

| Variables |                     | Model 0(Intercept only) |       | Model 1(khat and alcohol including age and gender) |         | Full model |         |
|-----------|---------------------|-------------------------|-------|----------------------------------------------------|---------|------------|---------|
|           |                     | OR                      | 95%CI | OR                                                 | 95%CI   | aOR        | 95%CI   |
| Khat UD   | No                  | Reference               |       |                                                    |         |            |         |
|           | Yes                 | -                       | -     | 4.2                                                | 2.1-8.6 | 3.8        | 1.8-8.0 |
| AUDs      | No                  | Reference               |       |                                                    |         |            |         |
|           | Yes                 | -                       | -     | 3.3                                                | 1.6-6.6 | 3.2        | 1.6-6.6 |
| Age       | 18-24               | Reference               |       |                                                    |         |            |         |
|           | 25-34               | -                       | -     | 1.2                                                | 0.4-3.2 | -          | -       |
|           | 35-44               | -                       | -     | 1.8                                                | 0.5-6.4 | -          | -       |
|           | 45-54               | -                       | -     | 0.9                                                | 0.2-4.0 | -          | -       |
|           | ≥55                 | -                       | -     | 1.2                                                | 0.3-5.1 | -          | -       |
| Gender    | Female              | Reference               |       |                                                    |         |            |         |
|           | Male                | -                       | -     | 1.6                                                | 0.7-3.6 | -          | -       |
| Education | No formal education | Reference               |       |                                                    |         |            |         |

|                |                         |           |         |       |         |       |          |
|----------------|-------------------------|-----------|---------|-------|---------|-------|----------|
|                | Read and write/literate | -         | -       | -     | -       | 4·4   | 1·7-11·3 |
| Social support | Good                    | Reference |         |       |         |       |          |
|                | moderate                | -         | -       | -     | -       | 0·5   | 0·2-1·2  |
|                | Poor                    | -         | -       | -     | -       | 0·8   | 0·3-1·9  |
| Occupation     | Daily laborer           | Reference |         |       |         |       |          |
|                | Farmer                  | -         | -       | -     | -       | 2·1   | 0·5-8·0  |
|                | Government employee     | -         | -       | -     | -       | 2·1   | 0·6-8·0  |
|                | Merchant                | -         | -       | -     | -       | 6·1   | 1·2-30·8 |
| Time T2        |                         | 2·7       | 2·0-3·6 | 2·7   | 2·0-3·6 | 2·8   | 2·0-3·8  |
| BIC            |                         | 642·5     |         | 672·6 |         | 642·2 |          |

## Discussion

This study conducted in patients undergoing standardized treatment for tuberculosis in Southwest Ethiopia revealed three important findings: 1) adherence to medication decreased over the course of treatment; 2) substance use disorders, particularly khat and alcohol contributed to this non-adherence; and 3) this association was independent of other factors such as education, social support, and occupation.

It is alarming that adherence to TB medication decreased over the course of treatment, as already shown by studies done in South Ethiopia (52), Northwest Ethiopia (53), and Addis Ababa (54) Ethiopia. Possible reasons for non-compliance are distance from the health institution that dispenses medications (13, 52), lack of knowledge about tuberculosis (52, 53), psychological distress (54), being busy with work (53), and alcohol intake (51). To solve the problem related to adherence, Ethiopian health authorities have reinforced their efforts to implement DOT programs

1  
2  
3 throughout the whole treatment and all over the country starting from initiation to completion of  
4  
5 treatment (12).  
6  
7

8  
9 In this study, the prevalence of non-adherence to anti-TB medication in the first month of  
10  
11 treatment was 9.7 % which is in line with a systematic review that found 10.0% of non-  
12  
13 adherence in the Amhara region (13, 55). The proportion of non-adherence to anti-TB  
14  
15 medications during the first (26.1%) and second (27.6%) follow up was slightly higher than  
16  
17 findings from South Ethiopia (24.5%) (52), Northwest Ethiopia (21.2%) (53), and Addis Ababa  
18  
19 (19.5%) (54). This might be explained by the high proportion of persons with a substance use  
20  
21 disorder in our study, in which we deliberately oversampled persons with SUD to maximize  
22  
23 power. The discrepancy may be also due to patients in our study were using substances whereas  
24  
25 in the systematic review there was no data regarding substance use.  
26  
27  
28  
29

30  
31 In this study, the prevalence of non-adherence among patients with substance use disorder at  
32  
33 baseline, first, and second follow up was 16.4%, 41.7%, and 45.7% respectively. This is in line  
34  
35 with a study from the US (39%) (53, 56, 57).  
36  
37

38  
39 Moreover, this study provides the evidence that substance use disorders have a significant  
40  
41 negative effect on adherence to anti-TB medications among patients with tuberculosis, which  
42  
43 supports earlier findings from previous studies that found alcohol use disorder, tobacco  
44  
45 dependence, and illicit drug use have a negative impact on adherence in Uzbekistan, Spain, and  
46  
47 Morocco (58-60). This is also comparable with retrospective studies conducted in Russia and  
48  
49 New York which found that alcohol use disorder and drug addiction were significantly  
50  
51 associated with non-adherence to anti-TB medications (8, 9). Likewise, the finding of this study  
52  
53 is in line with studies conducted in different parts of Ethiopia which found khat, alcohol, and  
54  
55  
56  
57  
58  
59  
60

1  
2  
3 tobacco are the main factors for non-adherence to anti-TB medications (53, 57, 61). In our study,  
4 patients with substance use disorder were more than two times more likely not to follow their  
5 medication plan than patients without substance use disorders. This finding is in line with the  
6 finding of a study conducted in US that found the risk of missing a DOT appointment was 2.6  
7 times higher among patients with substance use disorder than in patients without drug  
8 consumption (56).

9  
10 In our study, khat use disorder turned out to be the most stringent factor that decreased  
11 adherence. This confirms earlier findings from Yemen (62) and Ethiopia (14, 61). A plausible  
12 explanation is that khat chewing disrupts night sleep (63) causing patients to oversleep which  
13 may lead to missing of the DOT appointments at the health facility. Another reason may be that  
14 khat is common substance in Ethiopia, and therefore less attention is paid to its use. Since little is  
15 known about the effect of khat on patients with tuberculosis (14), it may be considered as part of  
16 a normal social interaction (62).

17  
18 A higher level of education was associated with non-adherence to anti-TB medications in our  
19 study. This result confirms the findings from Yemen that found more educated patients were  
20 19% times less likely to be adherent to their medication (62). Also, a study from Ethiopia  
21 showed that attending primary education was associated with non-adherence to anti-TB  
22 medications (61). Our findings are contrary to previous studies which have suggested that lower  
23 or no formal education decreases adherence to TB medication (13, 64). Our finding seems  
24 counterintuitive. However, our results are likely to be related to findings from a study indicating  
25 that persons with higher educational attainment might be reluctant to accept DOTS regimes (65).  
26 Daily visits to the health facility have been reported as time consuming and probably  
27 stigmatizing for patients with a job (66). In this study, being merchant was associated with poor

1  
2  
3 adherence to anti-TB medications. This might be due to patients miss their medications because  
4  
5 of busy working schedule, but this needs further investigation.  
6  
7

## 8 **Limitations**

9  
10  
11 This study has some limitations. Due to social desirability, patients might minimize reporting of  
12  
13 the amount and frequency of substance they were using. The tools used for alcohol and khat use  
14  
15 disorder are not gold-standard diagnostic for the respective disorders. Also, measuring adherence  
16  
17 based on pills count may not reflect the real adherence situation since some patients might not  
18  
19 bring all leftover medications during the follow up. Likewise, follow up and data collections  
20  
21 have been carried out by health professionals working in the respective TB clinics which might  
22  
23 have biased their assessment of adherence. However, overestimating adherence may have biased  
24  
25 our results towards a null effect and led to underestimating the effect of substance use disorders,  
26  
27 so we are confident that our estimates are conservative. The participation of district tuberculosis  
28  
29 focal persons and other health professionals in the supervision of data collection might have also  
30  
31 introduced bias.  
32  
33  
34  
35  
36  
37

38 Furthermore, hospitalized patients, patients on re-treatment, and patients with MDR-TB were not  
39  
40 included in this study, so that the results cannot be generalized for these patients. However,  
41  
42 MDR-TB patients are under special treatment and surveillance so that including this group of  
43  
44 patients might have biased the results. Finally, we did not assess the reasons for non-adherence.  
45  
46 This should be part of a separate study going more into the details of the situation of persons  
47  
48 with khat and alcohol problems.  
49  
50  
51  
52  
53  
54  
55  
56  
57  
58  
59  
60

## Strengths

The specific strengths of this study are the prospective cohort design, longitudinal data collection, including patients from urban and rural health institutions, intensive training given for data collectors, multi-center data collection, and the use of standardized instruments to assess exposure, outcomes, and explanatory variables.

## Conclusions

Substance use disorders predict greater likelihood of anti-TB medication non-adherence among TB patients. Also, khat and alcohol use disorders were the main risk factors for anti-TB medication adherence. This finding implies the importance of integrating substance use disorders screening and treatment into the existing tuberculosis services to reduce the effect of substances on treatment outcomes including adherence.

## Ethics approval and consent to participate

Ethical clearance was obtained from the ethical review committee of Jimma University, Institute of Health. Written informed consent was obtained from each participant before participation. Information obtained in due course was kept confidentially

## Consent for publication

Not applicable.

## Competing of interest

All authors declare that they have no conflict of interests.

## Funding

The study was funded by Jimma University Institute of Health with the grant number of IHRPGC 1095/2017, Institute of Psychiatric Phenomics and Genomics (IPPG) with the grant number of 15106202/2018, and individual throughout data collection. The funders had no role in this study including interpretation and preparation of the manuscript.

## Authors' contribution

MS contributed to the conceptualization, design, statistical analysis, and manuscript preparation. MT, KA, WK, ET, YY, RS, and EG contributed to the design, analysis, and review of the manuscript.

## Author affiliations

<sup>1</sup> Department of Psychiatry, Medical Faculty, Jimma University, Jimma Ethiopia.

<sup>2</sup> Department of Psychiatry, St. Paul's Hospital Millennium Medical College, Addis Ababa, Ethiopia

<sup>3</sup> Department of Psychiatry and Psychotherapy, LMU Munich, Germany

<sup>4</sup> Institute of Psychiatric Phenomics and Genomics (IPPG), University Hospital, LMU Munich, Germany

<sup>5</sup> Department of Forensic Psychiatry, Isar Amper Klinikum, Munich, Germany

<sup>6</sup> Institute for Medical Information Processing, Biometrics and Epidemiology, LMU Munich, Munich, Germany

<sup>7</sup> Center for International Health, Ludwig Maxmillians University, Munich, Germany

## Acknowledgment

We are grateful to the study participants for sacrificing their time to participate in the study. Our gratitude is extended to Jimma University for funding the project. We are also grateful to IPPG for funding part of the project. Our gratitude also extends to Dr. Michael Odenwald, who contributed money from his pocket to support the project.

## Availability of data

It will be available upon official request from interested individuals or organizations.

## References

1. Global tuberculosis report 2018. Geneva: World Health Organization; 2018. Licence: CC BY-NC-SA 3.0 IGO. [https://www.who.int/tb/publications/global\\_report/en/](https://www.who.int/tb/publications/global_report/en/) accessed on 24/07/2019
2. Grobusch MP, Kapata N. Global burden of tuberculosis: where we are and what to do. *Lancet Infect Dis.* 2018; 18(12):1291-3.
3. Patel V, Chisholm D, Dua T, Laxminarayan R, Medina-Mora ME. Mental, Neurological, and Substance Use Disorders: Disease Control Priorities, Third Edition (Volume 4). Washington (DC): The International Bank for Reconstruction and Development / The World Bank, 2016.
4. Floyd K, Glaziou P, Zumla A, Raviglione M. The global tuberculosis epidemic and progress in care, prevention, and research: an overview in year 3 of the end TB era. *Lancet Respir Med.* 2018; 6(4):299-314.
5. Global tuberculosis report 2016, Geneva, World Health Organization; 2016. <https://apps.who.int/medicinedocs/en/d/Js23098en/> accessed on 24/07/2019.



- 1  
2  
3 6. Dodor EA. Tuberculosis treatment default at the communicable diseases unit of Effia-  
4 Nkwanta Regional Hospital: a 2-year experience. *Int J Tuberc Lung Dis.* 2004; 8(11):1337-41.  
5  
6
- 7  
8 7. Global tuberculosis report 2013. Geneva, World Health Organization; 2013.  
9  
10 <http://apps.who.int/medicinedocs/en/m/abstract/Js21534en/> accessed on 25/07/2019  
11  
12
- 13  
14 8. Gelmanova IY, Keshavjee S, Golubchikova VT, Berezina VI, Strelis AK, Yanova GV, et al.  
15  
16 Barriers to successful tuberculosis treatment in Tomsk, Russian Federation: non-adherence,  
17  
18 default and the acquisition of multidrug resistance. *Bulletin of the World Health Organization.*  
19  
20 2007; 85(9):703-11.  
21  
22
- 23  
24 9. Mekonnen HS, Azagew AW. Non-adherence to anti-tuberculosis treatment, reasons and  
25  
26 associated factors among TB patients attending at Gondar town health centers, Northwest  
27  
28 Ethiopia. *BMC Res Notes.* 2018; 11: 691.  
29  
30
- 31  
32 10. Mohd Shariff N, Shah SA, Kamaludin F. Predictors of death among drug-resistant  
33  
34 tuberculosis patients in Kuala Lumpur, Malaysia: A retrospective cohort study from 2009 to  
35  
36 2013. *J Glob Antimicrob Resist.* 2016; 6:102-7.  
37  
38
- 39  
40 11. Waitt CJ, Squire SB. A systematic review of risk factors for death in adults during and after  
41  
42 tuberculosis treatment. *Int J Tuberc Lung Dis.* 2011; 15(7):871-85.  
43  
44
- 45  
46 12. Federal Democratic Republic of Ethiopia MoH. Guidelines for clinical and programmatic  
47  
48 management of Tb, leprosy and Tb/HIV in Ethiopia fifth edition: MoH; 2012.  
49
- 50  
51 13. Zegeye A, Dessie G, Wagnew F, Gebrie A, Islam SMS, Tesfaye B, et al. Prevalence and  
52  
53 determinants of anti-tuberculosis treatment non-adherence in Ethiopia: A systematic review and  
54  
55 meta-analysis. *PLoS One.* 2019; 14(1):e0210422.  
56  
57

- 1  
2  
3 14. Ambaw F, Mayston R, Hanlon C, Medhin G, Alem A. Untreated depression and tuberculosis  
4 treatment outcomes, quality of life and disability, Ethiopia. *Bulletin of the World Health*  
5 *Organization*. 2018; 96(4):243-55.  
6  
7
- 8  
9  
10 15. Pelissari DM, Diaz-Quijano FA. Impact of alcohol disorder and the use of illicit drugs on  
11 tuberculosis treatment outcomes: a retrospective cohort study. *Arch Public Health*. 2018; 76:45.  
12  
13
- 14  
15 16. Silva MR, Pereira JC, Costa RR, Dias JA, Guimaraes MDC, Leite ICG. Drug addiction and  
16 alcoholism as predictors for tuberculosis treatment default in Brazil: a prospective cohort study.  
17 *Epidemiol Infect*. 2017; 145(16):3516-24.  
18  
19
- 20  
21 17. Deiss RG, Rodwell TC, Garfein RS. Tuberculosis and illicit drug use: review and update.  
22 *Clin Infect Dis*. 2009 ;48(1):72-82.  
23  
24
- 25  
26 18. Oeltmann JE, Kammerer JS, Pevzner ES, Moonan PK. Tuberculosis and substance abuse in  
27 the United States, 1997-2006. *Arch Intern Med*. 2009. 26;169(2):189-97  
28  
29
- 30  
31 19. O'Connell R, Chishinga N, Kinyanda E, Patel V, Ayles H, Weiss HA, et al. Prevalence and  
32 correlates of alcohol dependence disorder among TB and HIV infected patients in Zambia. *PloS*  
33 *one*. 2013; 8(9):e74406.  
34  
35
- 36  
37 20. Christensen AS, Roed C, Andersen PH, Andersen AB, Obel N. Long-term mortality in  
38 patients with pulmonary and extrapulmonary tuberculosis: a Danish nationwide cohort study.  
39 *Clinical epidemiology*. 2014; 6:405-21.  
40  
41
- 42  
43 21. Fleming MF, Krupitsky E, Tsoy M, Zvartau E, Brazhenko N, Jakubowiak W, et al. Alcohol  
44 and drug use disorders, HIV status and drug resistance in a sample of Russian TB patients. *The*  
45  
46  
47  
48  
49  
50  
51  
52  
53  
54  
55  
56  
57

1  
2  
3 international journal of tuberculosis and lung disease: the official journal of the International  
4 Union against Tuberculosis and Lung Disease. 2006; 10(5):565-70.  
5  
6

7  
8 22. Skrahina A, Hurevich H, Zalutskaya A, Sahalchyk E, Astrauko A, Hoffner S, et al.  
9 Multidrug-resistant tuberculosis in Belarus: the size of the problem and associated risk factors.  
10 Bulletin of the World Health Organization. 2013; 91(1):36-45.  
11  
12  
13

14  
15 23. Luqman W, Danowski TS. The use of khat (*Catha edulis*) in Yemen. Social and medical  
16 observations. *Ann Intern Med*. 1976;85(2):246-9.  
17  
18  
19

20  
21 24. Gebissa E. Khat in the Horn of Africa: historical perspectives and current trends. *J*  
22 *Ethnopharmacol*. 2010; 132(3):607-14.  
23  
24  
25

26  
27 25. Dhaifalah I, Santavy J. Khat habit and its health effect. A natural amphetamine. *Biomed Pap*  
28 *Med Fac Univ Palacky Olomouc Czech Repub*. 2004; 148(1):11-5.  
29  
30  
31

32  
33 26. Alfaifi H, Abdelwahab SI, Mohan S, Elhassan Taha MM, Syame SM, Shaala LA, et al. *Catha*  
34 *edulis* Forsk. (Khat): Evaluation of its Antidepressant-like Activity. *Pharmacognosy magazine*.  
35 2017; 13(Suppl 2):S354-s8.  
36  
37  
38

39  
40 27. Wolde D, Tadesse M, Abdella K, Abebe G, Ali S. Tuberculosis among Jimma University  
41 Undergraduate Students: First Insight about the Burden of Tuberculosis in Ethiopia Universities-  
42 Cross-Sectional Study. *Int J Bacteriol*. 2017;9840670.  
43  
44  
45

46  
47 28. Alemu YM, Awoke W, Wilder-Smith A. Determinants for tuberculosis in HIV-infected  
48 adults in Northwest Ethiopia: a multicentre case-control study. *BMJ Open*. 2016; 6(4):e009058.  
49  
50  
51

52  
53 29. Jaber AA, Khan AH, Sulaiman SA, Ahmad N. Role of socio-demographical factors on  
54 tuberculosis outcome in Yemen. *International journal of mycobacteriology*. 2016; 5(1):S20.  
55  
56  
57

- 1  
2  
3 30. Legesse M, Ameni G, Mamo G, Medhin G, Shawel D, Bjune G, et al. Knowledge and  
4 perception of pulmonary tuberculosis in pastoral communities in the middle and Lower Awash  
5 Valley of Afar region, Ethiopia. *BMC Public Health*. 2010; 10:187.  
6  
7  
8  
9  
10  
11 31. Alvi A, Rizwan M, Sunosi RA, Bin Ali Jerah A. Does khat chewing increases the risk of  
12 *Mycobacterium tuberculosis* infection by macrophage immune modulation? *Med Hypotheses*.  
13 2014; 82(6):667-9.  
14  
15  
16  
17  
18 32. Jaber AA, Khan AH, Syed Sulaiman SA, Ahmad N, Anaam MS. Evaluation of Health-  
19 Related Quality of Life among Tuberculosis Patients in Two Cities in Yemen. *PLoS One*. 2016;  
20 11(6):e0156258.  
21  
22  
23  
24  
25  
26 33. Jaber AAS, Khan AH, Sulaiman SAS. Evaluating treatment outcomes and durations among  
27 cases of smear-positive pulmonary tuberculosis in Yemen: a prospective follow-up study. *J*  
28 *Pharm Policy Pract*. 2017; 10:36.  
29  
30  
31  
32  
33  
34 34. Alvi A, Fatima N, Jerah AA, Rizwan M, Hobani YH, Sunosi RA, et al. Correlation between  
35 Resistin, Tuberculosis and Khat Addiction: A Study from South Western Province of Saudi  
36 Arabia. *PLoS One*. 2015; 10(10):e0140245.  
37  
38  
39  
40  
41  
42 35. Anaam MS I, Al Serouri AW, Aldobhani A. Factors affecting patients' compliance to anti-  
43 tuberculosis treatment in Yemen: *JPHSR*; 2013.  
44  
45  
46  
47 36. Cox G, Rampes H. Adverse effects of khat: a review. *Advances in Psychiatric Treatment*.  
48 2018; 9(6):456-63.  
49  
50  
51  
52 37. EPIInfoTM. <http://apps.who.int/medicinedocs/en/m/abstract/Js21534en/> accessed on  
53 19/08/2019  
54  
55  
56  
57  
58  
59  
60

1  
2  
3 38. Babor TF, Higgins-Biddle JC, Saunders JB, Monteiro MG. The Alcohol Use Disorders  
4 Identification Test Guidelines for Use in Primary Care. World Health Organization. 2001.

5  
6  
7  
8 [https://apps.who.int/iris/bitstream/handle/10665/67205/WHO\\_MSD\\_MSB\\_01.6a.pdf;jsessionid=](https://apps.who.int/iris/bitstream/handle/10665/67205/WHO_MSD_MSB_01.6a.pdf;jsessionid=B5D5F8F1F1B82FE622D04E8F02635F05?sequence=1)  
9 [B5D5F8F1F1B82FE622D04E8F02635F05?sequence=1](https://apps.who.int/iris/bitstream/handle/10665/67205/WHO_MSD_MSB_01.6a.pdf;jsessionid=B5D5F8F1F1B82FE622D04E8F02635F05?sequence=1) accessed on 20/07/2019.

10  
11  
12  
13  
14 39. Babor TF, Higgins-Biddle JC, Saunders JB, Monteiro MG. The Alcohol Use Disorders  
15 Identification Test Guidelines for Use in Primary Care. World Health Organization. 2001.

16  
17  
18  
19 40. Soboka M, Tesfaye M, Feyissa GT, Hanlon C. Alcohol use disorders and associated factors  
20 among people living with HIV who are attending services in south west Ethiopia. BMC research  
21 notes. 2014; 7:828.

22  
23  
24  
25  
26  
27 41. Mikami I, Akechi T, Kugaya A, Okuyama T, Nakano T, Okamura H, et al. Screening for  
28 nicotine dependence among smoking-related cancer patients. Japanese journal of cancer research  
29 : Gann. 1999; 90(10):1071-5.

30  
31  
32  
33  
34  
35 42. Duresso SW, Matthews AJ, Ferguson SG, Bruno R. Is khat use disorder a valid diagnostic  
36 entity? Addiction. 2016; 111(9):1666-76.

37  
38  
39  
40 43. Average Salary in Ethiopia. [http://www.salaryexplorer.com/salary-](http://www.salaryexplorer.com/salary-survey.php?loc=69&loctype=1)  
41 [survey.php?loc=69&loctype=1](http://www.salaryexplorer.com/salary-survey.php?loc=69&loctype=1) accessed on 09/07/2019.

42  
43  
44  
45 44. Instrument Manual: Oslo-3 Social Support Scale (OSS-3)2006.  
46 [https://circabc.europa.eu/webdav/CircaBC/ESTAT/healthtf/Library/ehis\\_wave\\_2/methodology\\_e](https://circabc.europa.eu/webdav/CircaBC/ESTAT/healthtf/Library/ehis_wave_2/methodology_ehis/development/instruments/Manual_OSS_3.pdf)  
47 [his/development/instruments/Manual\\_OSS\\_3.pdf](https://circabc.europa.eu/webdav/CircaBC/ESTAT/healthtf/Library/ehis_wave_2/methodology_ehis/development/instruments/Manual_OSS_3.pdf) , Accessed on 08/06/2019

- 1  
2  
3 45. Duko B, Gebeyehu A, Ayano G. Prevalence and correlates of depression and anxiety among  
4 patients with tuberculosis at WolaitaSodo University Hospital and Sodo Health Center,  
5 WolaitaSodo, South Ethiopia, Cross sectional study. BMC psychiatry. 2015; 15:214.  
6  
7  
8  
9  
10  
11 46. Coates J SA, Bilinsky P. Household Food Insecurity Access Scale (HFIAS) for measurement  
12 of food access: Indicator guide (V.3): Washington, D.C.: FHI 360/FANTA; 2007.  
13  
14  
15  
16 [http://www.fao.org/fileadmin/user\\_upload/eufao-fsi4dm/doc-training/hfias.pdf](http://www.fao.org/fileadmin/user_upload/eufao-fsi4dm/doc-training/hfias.pdf) accessed on  
17  
18 10/01/2017  
19  
20  
21 47. Tesfaye M, Kaestel P, Olsen MF, Girma T, Yilma D, Abdissa A, et al. Food insecurity,  
22 mental health and quality of life among people living with HIV commencing antiretroviral  
23 treatment in Ethiopia: a cross-sectional study. Health and quality of life outcomes. 2016; 14:37.  
24  
25  
26  
27  
28  
29 48. Maes KC, Hadley C, Tesfaye F, Shifferaw S, Tesfaye YA. Food insecurity among volunteer  
30 AIDS caregivers in Addis Ababa, Ethiopia was highly prevalent but buffered from the 2008 food  
31 crisis. The Journal of nutrition. 2009; 139(9):1758-64.  
32  
33  
34  
35  
36  
37 49. Greenland S, Pearl J, Robins JM. Causal diagrams for epidemiologic research.  
38 Epidemiology. 1999; 10(1):37-48.  
39  
40  
41  
42 50. Textor J, Hardt J, Knuppel S. DAGitty: a graphical tool for analyzing causal diagrams.  
43 Epidemiology. 2011; 22(5):745.  
44  
45  
46  
47  
48 51. Shrier I, Platt RW. Reducing bias through directed acyclic graphs. BMC Med Res Methodol.  
49 2008; 8:70.  
50  
51  
52  
53  
54  
55  
56  
57  
58  
59  
60

- 1  
2  
3 52. Woimo TT, Yimer WK, Bati T, Gesesew HA. The prevalence and factors associated for anti-  
4 tuberculosis treatment non-adherence among pulmonary tuberculosis patients in public health  
5 care facilities in South Ethiopia: a cross-sectional study. *BMC Public Health*. 2017; 17(1):269.  
6  
7  
8  
9  
10  
11 53. Mekonnen HS, Azagew AW. Non-adherence to anti-tuberculosis treatment, reasons and  
12 associated factors among TB patients attending at Gondar town health centers, Northwest  
13 Ethiopia. *BMC research notes*. 2018; 11(1):691.  
14  
15  
16  
17  
18 54. Tola HH, Garmaroudi G, Shojaeizadeh D, Tol A, Yekaninejad MS, Ejeta LT, et al. The  
19 Effect of Psychosocial Factors and Patients' Perception of Tuberculosis Treatment Non-  
20 Adherence in Addis Ababa, Ethiopia. *Ethiopian journal of health sciences*. 2017; 27(5):447-58.  
21  
22  
23  
24  
25  
26 55. Adane AA, Alene KA, Koye DN, Zeleke BM. Non-adherence to anti-tuberculosis treatment  
27 and determinant factors among patients with tuberculosis in northwest Ethiopia. *PLoS One*.  
28 2013; 8(11):e78791.  
29  
30  
31  
32  
33  
34 56. Ricks PM, Hershov RC, Rahimian A, Huo D, Johnson W, Prachand N, et al. A randomized  
35 trial comparing standard outcomes in two treatment models for substance users with  
36 tuberculosis. *Int J Tuberc Lung Dis*. 2015; 19(3):326-32.  
37  
38  
39  
40  
41  
42 57. Sahile Z, Yared A, Kaba M. Patients' experiences and perceptions on associates of TB  
43 treatment adherence: a qualitative study on DOTS service in public health centers in Addis  
44 Ababa, Ethiopia. *BMC Public Health*. 2018; 18(1):462.  
45  
46  
47  
48  
49  
50 58. Hasker E, Khodjikhhanov M, Usarova S, Asamidinov U, Yuldashova U, van der Werf MJ, et  
51 al. Default from tuberculosis treatment in Tashkent, Uzbekistan; who are these defaulters and  
52 why do they default? *BMC Infect Dis*. 2008; 8:97.  
53  
54  
55  
56  
57  
58  
59  
60

- 1  
2  
3 59. Cayla JA, Caminero JA, Rey R, Lara N, Valles X, Galdos-Tanguis H. Current status of  
4 treatment completion and fatality among tuberculosis patients in Spain. *Int J Tuberc Lung Dis.*  
5  
6 2004; 8(4):458-64.  
7  
8  
9  
10  
11 60. Dooley KE, Lahlou O, Ghali I, Knudsen J, Elmessaoudi MD, Cherkaoui I, et al. Risk factors  
12 for tuberculosis treatment failure, default, or relapse and outcomes of retreatment in Morocco.  
13 *BMC Public Health.* 2011; 11:140.  
14  
15  
16  
17  
18 61. Tesfahuneygn G, Medhin G, Legesse M. Adherence to Anti-tuberculosis treatment and  
19 treatment outcomes among tuberculosis patients in Alamata District, northeast Ethiopia. *BMC*  
20 *research notes.* 2015; 8:503.  
21  
22  
23  
24  
25  
26 62. Anaam MS, Mohamed Ibrahim MI, Al Serouri AW, Aldobhani A. Factors affecting patients'  
27 compliance to anti-tuberculosis treatment in Yemen. *Journal of Pharmaceutical Health Services*  
28 *Research.* 2013; 4(2):115-22.  
29  
30  
31  
32  
33  
34 63. Adane K, Spigt M, Ferede S, Asmelash T, Abebe M, Dinant GJ. Half of Pulmonary  
35 Tuberculosis Cases Were Left Undiagnosed in Prisons of the Tigray Region of Ethiopia:  
36 Implications for Tuberculosis Control. *PLoS One.* 2016; 11(2):e0149453.  
37  
38  
39  
40  
41  
42 64. Fang XH, Dan YL, Liu J, Jun L, Zhang ZP, Kan XH, et al. Factors influencing completion of  
43 treatment among pulmonary tuberculosis patients. *Patient Prefer Adherence.* 2019; 13:491-6.  
44  
45  
46  
47 65. Kawatsu L, Uchimura K, Ohkado A, Kato S. A combination of quantitative and qualitative  
48 methods in investigating risk factors for lost to follow-up for tuberculosis treatment in Japan -  
49 Are physicians and nurses at a particular risk? *PLoS One.* 2018; 13(6):e0198075.  
50  
51  
52  
53  
54  
55  
56  
57  
58  
59  
60



1  
2  
3 66. Gebreweld FH, Kifle MM, Gebremicheal FE, Simel LL, Gezae MM, Ghebreyesus SS, et al.  
4 Factors influencing adherence to tuberculosis treatment in Asmara, Eritrea: a qualitative study. J  
5 Health Popul Nutr. 2018; 37(1):1.  
6  
7  
8  
9  
10  
11  
12  
13  
14  
15  
16  
17  
18  
19  
20  
21  
22  
23  
24  
25  
26  
27  
28  
29  
30  
31  
32  
33  
34  
35  
36  
37  
38  
39  
40  
41  
42  
43  
44  
45  
46  
47  
48  
49  
50  
51  
52  
53  
54  
55  
56  
57  
58  
59  
60

For peer review only

# Reporting checklist for cohort study.

Based on the STROBE cohort guidelines.

## Instructions to authors

Complete this checklist by entering the page numbers from your manuscript where readers will find each of the items listed below.

Your article may not currently address all the items on the checklist. Please modify your text to include the missing information. If you are certain that an item does not apply, please write "n/a" and provide a short explanation.

Upload your completed checklist as an extra file when you submit to a journal.

In your methods section, say that you used the STROBE cohort reporting guidelines, and cite them as:

von Elm E, Altman DG, Egger M, Pocock SJ, Gøtzsche PC, Vandenbroucke JP. The Strengthening the Reporting of Observational Studies in Epidemiology (STROBE) Statement: guidelines for reporting observational studies.

|                           |                     |                                                                                    | Page   |
|---------------------------|---------------------|------------------------------------------------------------------------------------|--------|
|                           |                     | Reporting Item                                                                     | Number |
| <b>Title and abstract</b> |                     |                                                                                    |        |
| Title                     | <a href="#">#1a</a> | Indicate the study's design with a commonly used term in the title or the abstract | 1      |
| Abstract                  | <a href="#">#1b</a> | Provide in the abstract an informative and balanced summary                        | 2,3    |

of what was done and what was found

## Introduction

Background / [#2](#) Explain the scientific background and rationale for the 4-6  
rationale investigation being reported

Objectives [#3](#) State specific objectives, including any prespecified 6  
hypotheses

## Methods

Study design [#4](#) Present key elements of study design early in the paper 6

Setting [#5](#) Describe the setting, locations, and relevant dates, including 6  
periods of recruitment, exposure, follow-up, and data collection

Eligibility criteria [#6a](#) Give the eligibility criteria, and the sources and methods of 6  
selection of participants. Describe methods of follow-up.

Eligibility criteria [#6b](#) For matched studies, give matching criteria and number of  
exposed and unexposed

Variables [#7](#) Clearly define all outcomes, exposures, predictors, potential 7-10  
confounders, and effect modifiers. Give diagnostic criteria, if  
applicable

Data sources / [#8](#) For each variable of interest give sources of data and details of 7-10  
measurement methods of assessment (measurement). Describe  
comparability of assessment methods if there is more than one  
group. Give information separately for for exposed and  
unexposed groups if applicable.

|    |                |                      |                                                                   |        |
|----|----------------|----------------------|-------------------------------------------------------------------|--------|
| 1  | Bias           | <a href="#">#9</a>   | Describe any efforts to address potential sources of bias         | 10,11  |
| 2  |                |                      |                                                                   |        |
| 3  |                |                      |                                                                   |        |
| 4  | Study size     | <a href="#">#10</a>  | Explain how the study size was arrived at                         | 7      |
| 5  |                |                      |                                                                   |        |
| 6  |                |                      |                                                                   |        |
| 7  | Quantitative   | <a href="#">#11</a>  | Explain how quantitative variables were handled in the            | 10, 11 |
| 8  | variables      |                      | analyses. If applicable, describe which groupings were chosen,    |        |
| 9  |                |                      | and why                                                           |        |
| 10 |                |                      |                                                                   |        |
| 11 |                |                      |                                                                   |        |
| 12 |                |                      |                                                                   |        |
| 13 |                |                      |                                                                   |        |
| 14 |                |                      |                                                                   |        |
| 15 | Statistical    | <a href="#">#12a</a> | Describe all statistical methods, including those used to control | 10,11  |
| 16 | methods        |                      | for confounding                                                   |        |
| 17 |                |                      |                                                                   |        |
| 18 |                |                      |                                                                   |        |
| 19 |                |                      |                                                                   |        |
| 20 | Statistical    | <a href="#">#12b</a> | Describe any methods used to examine subgroups and                |        |
| 21 | methods        |                      | interactions                                                      |        |
| 22 |                |                      |                                                                   |        |
| 23 |                |                      |                                                                   |        |
| 24 |                |                      |                                                                   |        |
| 25 |                |                      |                                                                   |        |
| 26 | Statistical    | <a href="#">#12c</a> | Explain how missing data were addressed                           | 10     |
| 27 | methods        |                      |                                                                   |        |
| 28 |                |                      |                                                                   |        |
| 29 |                |                      |                                                                   |        |
| 30 |                |                      |                                                                   |        |
| 31 | Statistical    | <a href="#">#12d</a> | If applicable, explain how loss to follow-up was addressed        |        |
| 32 | methods        |                      |                                                                   |        |
| 33 |                |                      |                                                                   |        |
| 34 |                |                      |                                                                   |        |
| 35 |                |                      |                                                                   |        |
| 36 | Statistical    | <a href="#">#12e</a> | Describe any sensitivity analyses                                 |        |
| 37 | methods        |                      |                                                                   |        |
| 38 |                |                      |                                                                   |        |
| 39 |                |                      |                                                                   |        |
| 40 |                |                      |                                                                   |        |
| 41 |                |                      |                                                                   |        |
| 42 | <b>Results</b> |                      |                                                                   |        |
| 43 |                |                      |                                                                   |        |
| 44 |                |                      |                                                                   |        |
| 45 | Participants   | <a href="#">#13a</a> | Report numbers of individuals at each stage of study—eg           | 12     |
| 46 |                |                      | numbers potentially eligible, examined for eligibility, confirmed |        |
| 47 |                |                      | eligible, included in the study, completing follow-up, and        |        |
| 48 |                |                      | analysed. Give information separately for for exposed and         |        |
| 49 |                |                      | unexposed groups if applicable.                                   |        |
| 50 |                |                      |                                                                   |        |
| 51 |                |                      |                                                                   |        |
| 52 |                |                      |                                                                   |        |
| 53 |                |                      |                                                                   |        |
| 54 |                |                      |                                                                   |        |
| 55 |                |                      |                                                                   |        |
| 56 |                |                      |                                                                   |        |
| 57 | Participants   | <a href="#">#13b</a> | Give reasons for non-participation at each stage                  |        |
| 58 |                |                      |                                                                   |        |
| 59 |                |                      |                                                                   |        |
| 60 |                |                      |                                                                   |        |

|    |                   |                      |                                                                   |        |
|----|-------------------|----------------------|-------------------------------------------------------------------|--------|
| 1  | Participants      | <a href="#">#13c</a> | Consider use of a flow diagram                                    |        |
| 2  |                   |                      |                                                                   |        |
| 3  |                   |                      |                                                                   |        |
| 4  | Descriptive data  | <a href="#">#14a</a> | Give characteristics of study participants (eg demographic,       | 12, 13 |
| 5  |                   |                      | clinical, social) and information on exposures and potential      |        |
| 6  |                   |                      | confounders. Give information separately for exposed and          |        |
| 7  |                   |                      | unexposed groups if applicable.                                   |        |
| 8  |                   |                      |                                                                   |        |
| 9  |                   |                      |                                                                   |        |
| 10 |                   |                      |                                                                   |        |
| 11 |                   |                      |                                                                   |        |
| 12 |                   |                      |                                                                   |        |
| 13 |                   |                      |                                                                   |        |
| 14 | Descriptive data  | <a href="#">#14b</a> | Indicate number of participants with missing data for each        | 12     |
| 15 |                   |                      | variable of interest                                              |        |
| 16 |                   |                      |                                                                   |        |
| 17 |                   |                      |                                                                   |        |
| 18 |                   |                      |                                                                   |        |
| 19 | Descriptive data  | <a href="#">#14c</a> | Summarise follow-up time (eg, average and total amount)           |        |
| 20 |                   |                      |                                                                   |        |
| 21 |                   |                      |                                                                   |        |
| 22 |                   |                      |                                                                   |        |
| 23 | Outcome data      | <a href="#">#15</a>  | Report numbers of outcome events or summary measures              | 14, 15 |
| 24 |                   |                      | over time. Give information separately for exposed and            |        |
| 25 |                   |                      | unexposed groups if applicable.                                   |        |
| 26 |                   |                      |                                                                   |        |
| 27 |                   |                      |                                                                   |        |
| 28 |                   |                      |                                                                   |        |
| 29 |                   |                      |                                                                   |        |
| 30 | Main results      | <a href="#">#16a</a> | Give unadjusted estimates and, if applicable, confounder-         | 14-18  |
| 31 |                   |                      | adjusted estimates and their precision (eg, 95% confidence        |        |
| 32 |                   |                      | interval). Make clear which confounders were adjusted for and     |        |
| 33 |                   |                      | why they were included                                            |        |
| 34 |                   |                      |                                                                   |        |
| 35 |                   |                      |                                                                   |        |
| 36 |                   |                      |                                                                   |        |
| 37 |                   |                      |                                                                   |        |
| 38 |                   |                      |                                                                   |        |
| 39 |                   |                      |                                                                   |        |
| 40 | Main results      | <a href="#">#16b</a> | Report category boundaries when continuous variables were         |        |
| 41 |                   |                      | categorized                                                       |        |
| 42 |                   |                      |                                                                   |        |
| 43 |                   |                      |                                                                   |        |
| 44 |                   |                      |                                                                   |        |
| 45 | Main results      | <a href="#">#16c</a> | If relevant, consider translating estimates of relative risk into |        |
| 46 |                   |                      | absolute risk for a meaningful time period                        |        |
| 47 |                   |                      |                                                                   |        |
| 48 |                   |                      |                                                                   |        |
| 49 |                   |                      |                                                                   |        |
| 50 |                   |                      |                                                                   |        |
| 51 | Other analyses    | <a href="#">#17</a>  | Report other analyses done—e.g., analyses of subgroups and        |        |
| 52 |                   |                      | interactions, and sensitivity analyses                            |        |
| 53 |                   |                      |                                                                   |        |
| 54 |                   |                      |                                                                   |        |
| 55 |                   |                      |                                                                   |        |
| 56 | <b>Discussion</b> |                      |                                                                   |        |
| 57 |                   |                      |                                                                   |        |
| 58 |                   |                      |                                                                   |        |
| 59 |                   |                      |                                                                   |        |
| 60 |                   |                      |                                                                   |        |

|    |                          |                     |                                                                      |       |
|----|--------------------------|---------------------|----------------------------------------------------------------------|-------|
| 1  | Key results              | <a href="#">#18</a> | Summarise key results with reference to study objectives             | 19-21 |
| 2  |                          |                     |                                                                      |       |
| 3  |                          |                     |                                                                      |       |
| 4  | Limitations              | <a href="#">#19</a> | Discuss limitations of the study, taking into account sources of     | 21    |
| 5  |                          |                     | potential bias or imprecision. Discuss both direction and            |       |
| 6  |                          |                     | magnitude of any potential bias.                                     |       |
| 7  |                          |                     |                                                                      |       |
| 8  |                          |                     |                                                                      |       |
| 9  |                          |                     |                                                                      |       |
| 10 |                          |                     |                                                                      |       |
| 11 |                          |                     |                                                                      |       |
| 12 | Interpretation           | <a href="#">#20</a> | Give a cautious overall interpretation considering objectives,       | 19-21 |
| 13 |                          |                     | limitations, multiplicity of analyses, results from similar studies, |       |
| 14 |                          |                     | and other relevant evidence.                                         |       |
| 15 |                          |                     |                                                                      |       |
| 16 |                          |                     |                                                                      |       |
| 17 |                          |                     |                                                                      |       |
| 18 |                          |                     |                                                                      |       |
| 19 | Generalisability         | <a href="#">#21</a> | Discuss the generalisability (external validity) of the study        |       |
| 20 |                          |                     | results                                                              |       |
| 21 |                          |                     |                                                                      |       |
| 22 |                          |                     |                                                                      |       |
| 23 |                          |                     |                                                                      |       |
| 24 |                          |                     |                                                                      |       |
| 25 | <b>Other Information</b> |                     |                                                                      |       |
| 26 |                          |                     |                                                                      |       |
| 27 |                          |                     |                                                                      |       |
| 28 | Funding                  | <a href="#">#22</a> | Give the source of funding and the role of the funders for the       | 23    |
| 29 |                          |                     | present study and, if applicable, for the original study on which    |       |
| 30 |                          |                     | the present article is based                                         |       |
| 31 |                          |                     |                                                                      |       |
| 32 |                          |                     |                                                                      |       |
| 33 |                          |                     |                                                                      |       |
| 34 |                          |                     |                                                                      |       |
| 35 |                          |                     |                                                                      |       |

36 None The STROBE checklist is distributed under the terms of the Creative Commons Attribution  
37 License CC-BY. This checklist can be completed online using <https://www.goodreports.org/>, a tool  
38 made by the [EQUATOR Network](#) in collaboration with [Penelope.ai](#)  
39  
40  
41  
42  
43  
44  
45  
46  
47  
48  
49  
50  
51  
52  
53  
54  
55  
56  
57  
58  
59  
60
